# Supplementary material for: A Generic Multivariate Framework for the Integration of Microbiome Longitudinal Studies With Other Data Types
Source: Front Genet. 2019 Nov 7;10:963. doi: 10.3389/fgene.2019.00963 (PMC6875829; doi:10.3389/fgene.2019.00963)
Supplement: Supplementary file 2 [file Table_1.xls]

## Sheet: Vaginal
Feature	Name	Cluster ID	selected	F_1003	F_119	F_120	F_121	F_1221	F_1247	F_1264	F_1276	F_1280	F_1281	F_1284	F_1285	F_1307	F_1315	F_1316	F_1334	F_1345	F_1387	F_1388	F_1451	F_1452	F_1490	F_1491	F_1493	F_1514	F_1530	F_1563	F_1645	F_1646	F_1663	F_1667	F_1671	F_1678	F_1679	F_1683	F_171	F_1713	F_1714	F_174	F_1751	F_1754	F_1763	F_1769	F_177	F_1772	F_1826
F_1003	2.28.4 DELTA_SUBDIVISION	-1	no	0	3.53203	3.9358	6.83125	0.00165629	0.0211028	1.14529	3.22131	0.0658463	3.36008	0.277203	1.92753	3.0522	1.60304	1.60304	1.069	0.00840295	2.52051	2.52051	11.8477	0.223122	1.53936	0.729782	0.398498	0.000669927	2.54409	2.33517	0.110948	0.214069	0.436723	0.139887	1.77621	0.679776	0.541082	0.00765676	1.97085	1.03716	1.20707	3.60588	0.384331	0.122988	0.0124171	0.211089	0.335437	0.426371	0.000393053
F_119	2.15 FLEXIBACTER-CYTOPHAGA-BACTEROIDES	1	no	3.53203	0	0.00138359	0.0339275	3.19543	2.55587	1.11122	0.00118505	8.58572	0.000335685	20.3516	0.0834995	0.592087	0.8453	0.8453	0.651982	4.58073	0.707332	0.707332	0.0798308	21.657	0.200639	1.98404	10.6105	3.78152	0.0186204	0.573603	12.4503	21.3752	8.38279	1.77198	0.85338	1.18482	1.25951	2.87546	0.6089	0.934245	0.892882	5.43665e-05	1.2956	1.82872	4.88021	1.59261	15.5541	1.30297	3.36033
F_120	2.15.1 BACTEROIDES_AND_CYTOPHAGA	1	no	3.9358	0.00138359	0	0.0218908	3.52643	2.76277	1.10897	0.00511744	10.5148	0.0030784	21.0616	0.104343	0.573044	0.835329	0.835329	0.67839	5.24026	0.688283	0.688283	0.0614189	25.1677	0.228533	1.93049	9.79403	4.24229	0.0298765	0.557317	15.784	25.3044	7.71344	1.85548	0.841459	1.19688	1.28027	3.14197	0.594286	0.933464	0.88839	0.000889885	1.32675	1.91996	5.62008	1.65294	14.8241	1.33047	3.72638
F_121	2.15.1.2 BACTEROIDES	1	yes	6.83125	0.0339275	0.0218908	0	5.80261	4.06832	1.09782	0.0472291	30.6539	0.0407533	14.2534	0.203402	0.491359	0.789025	0.789025	0.768117	10.5617	0.605637	0.605637	0.0107173	22.9242	0.345636	1.71528	6.2923	7.64628	0.0981563	0.491908	45.5386	24.9573	5.14005	2.32256	0.786222	1.25584	1.38507	4.89936	0.533312	0.930475	0.867811	0.0313458	1.48714	2.43524	11.7732	1.98019	9.25783	1.47177	6.29643
F_1221	2.28.5 EPSILON_SUBDIVISION	-1	no	0.00165629	3.19543	3.52643	5.80261	0	0.0110642	1.14211	2.9379	0.0865934	3.05322	0.308549	1.8344	3.27576	1.67107	1.67107	1.06517	0.0173919	2.62411	2.62411	9.46139	0.253527	1.49119	0.748971	0.429541	0.00442374	2.36715	2.38471	0.136051	0.244234	0.467122	0.114536	1.85971	0.657451	0.514334	0.00220628	2.02172	1.04553	1.22897	3.25627	0.35886	0.098881	0.0229372	0.182049	0.367001	0.395514	0.000436339
F_1247	2.28.5.3 CAMPYLOBACTER	-1	no	0.0211028	2.55587	2.76277	4.06832	0.0110642	0	1.13119	2.39111	0.15022	2.46532	0.390135	1.63962	3.87568	1.89263	1.89263	1.05567	0.0546866	2.84902	2.84902	5.87408	0.334578	1.38685	0.793345	0.507113	0.0290756	2.01261	2.4418	0.208409	0.325013	0.542285	0.0584649	2.1311	0.597449	0.443992	0.00342252	2.10975	1.06978	1.29253	2.5943	0.296394	0.046818	0.0638323	0.113227	0.447429	0.314274	0.015826
F_1264	2.29 FUSOBACTERIA_AND_RELATIVES	2	yes	1.14529	1.11122	1.10897	1.09782	1.14211	1.13119	0	1.11313	1.15415	1.11226	1.15076	1.12366	3.82833	1.27335	1.27335	1.13466	1.15046	1.37595	1.37595	1.08761	1.15201	1.12805	1.14066	1.14786	1.14701	1.11802	2.09387	1.15406	1.15222	1.14696	1.0937	0.681374	0.602202	0.440895	1.13773	14.3156	1.48694	1.68903	1.11079	1.983	1.09822	1.15124	1.07648	1.14936	1.03957	1.14381
F_1276	2.29.5 FUSOBACTERIA	1	yes	3.22131	0.00118505	0.00511744	0.0472291	2.9379	2.39111	1.11313	0	7.24601	0.000259603	18.729	0.0659569	0.60914	0.854008	0.854008	0.626116	4.08812	0.724322	0.724322	0.0986394	18.2534	0.175695	2.03108	11.1664	3.42964	0.0105001	0.588469	10.1872	17.8149	8.91507	1.70316	0.863799	1.17446	1.24187	2.66579	0.622082	0.934965	0.89682	0.00174625	1.26929	1.75373	4.33173	1.54241	15.609	1.27971	3.07709
F_1280	2.30 GRAM_POSITIVE_BACTERIA	-1	no	0.0658463	8.58572	10.5148	30.6539	0.0865934	0.15022	1.15415	7.24601	0	7.82902	0.096708	2.93103	1.985	1.31169	1.31169	1.09127	0.0285114	1.88868	1.88868	71.3939	0.059928	2.00376	0.576148	0.198005	0.0539375	4.7429	1.8436	0.0069703	0.0543724	0.234551	0.331553	1.41885	0.80503	0.697459	0.113325	1.5725	0.996717	1.09982	8.92251	0.548754	0.310859	0.0223152	0.410906	0.142383	0.607829	0.0756521
F_1281	2.30.1 HIGH_G+C_BACTERIA	1	no	3.36008	0.000335685	0.0030784	0.0407533	3.05322	2.46532	1.11226	0.000259603	7.82902	0	19.5795	0.0739463	0.601231	0.849994	0.849994	0.638388	4.30648	0.71645	0.71645	0.0896362	19.8254	0.18725	2.00947	10.937	3.58649	0.0140197	0.581542	11.1651	19.4379	8.6807	1.73443	0.858996	1.17921	1.24995	2.75995	0.615958	0.934629	0.895003	0.000660072	1.28132	1.78778	4.57441	1.56527	15.6634	1.29035	3.20376
F_1284	2.30.1.10 PROPIONIBACTERIUM	-1	no	0.277203	20.3516	21.0616	14.2534	0.308549	0.390135	1.15076	18.729	0.096708	19.5795	0	5.8942	1.38372	1.1423	1.1423	1.06758	0.208367	1.42979	1.42979	9.03313	0.00509341	3.09255	0.327613	0.0237529	0.257475	12.2361	1.34977	0.0544424	0.00698827	0.0407805	0.567741	1.21205	0.90915	0.836717	0.344946	1.21253	0.971256	1.02798	20.5906	0.713755	0.549914	0.193985	0.632218	0.00557418	0.77255	0.29243
F_1285	2.30.1.10.1 PRP.ACNES	1	no	1.92753	0.0834995	0.104343	0.203402	1.8344	1.63962	1.12366	0.0659569	2.93103	0.0739463	5.8942	0	0.719736	0.906279	0.906279	0.393268	2.1867	0.832967	0.832967	0.281943	5.07521	0.0316511	2.11289	6.92	1.99311	0.0249559	0.690121	3.48396	4.93675	6.74444	1.35709	0.926481	1.11562	1.14458	1.74019	0.709049	0.93994	0.920661	0.0874795	1.12707	1.37966	2.25379	1.28304	6.62106	1.15339	1.88074
F_1307	2.30.1.11 MICROMONOSPORA	1	yes	3.0522	0.592087	0.573044	0.491359	3.27576	3.87568	3.82833	0.60914	1.985	0.601231	1.38372	0.719736	0	0.326123	0.326123	0.881747	2.60048	0.896523	0.896523	0.431188	1.4756	0.776981	1.00704	1.23455	2.91679	0.656609	0.101425	1.77329	1.49327	1.19817	4.46478	0.889846	5.31598	2.43703	3.544	0.154216	0.265786	0.210832	0.588363	0.945725	4.50287	2.51361	4.10896	1.30446	2.69952	3.15964
F_1315	2.30.1.11.4 APL.UTAHENSIS	1	no	1.60304	0.8453	0.835329	0.789025	1.67107	1.89263	1.27335	0.854008	1.31169	0.849994	1.1423	0.906279	0.326123	0	0	0.973239	1.47623	1.05406	1.05406	0.750067	1.16965	0.931024	1.01968	1.09609	1.56386	0.877266	0.486325	1.25411	1.17482	1.08441	2.84702	0.673864	9.63262	2.02891	1.76077	0.671329	0.418186	0.241626	0.843371	1.12759	2.69837	1.45279	3.58167	1.11806	7.47813	1.63513
F_1316	2.30.1.11.4.022 Actinoplanesutahensis	1	no	1.60304	0.8453	0.835329	0.789025	1.67107	1.89263	1.27335	0.854008	1.31169	0.849994	1.1423	0.906279	0.326123	0	0	0.973239	1.47623	1.05406	1.05406	0.750067	1.16965	0.931024	1.01968	1.09609	1.56386	0.877266	0.486325	1.25411	1.17482	1.08441	2.84702	0.673864	9.63262	2.02891	1.76077	0.671329	0.418186	0.241626	0.843371	1.12759	2.69837	1.45279	3.58167	1.11806	7.47813	1.63513
F_1334	2.30.1.13 MYCOBACTERIUM_SUBDIVISION	1	no	1.069	0.651982	0.67839	0.768117	1.06517	1.05567	1.13466	0.626116	1.09127	0.638388	1.06758	0.393268	0.881747	0.973239	0.973239	0	1.07766	0.987356	0.987356	0.816592	1.08379	0.225362	0.41454	0.993485	1.07145	0.541251	0.84964	1.09441	1.08571	0.956187	1.0372	1.00711	1.04797	1.03838	1.06085	0.83784	0.947672	0.951445	0.657343	0.977795	1.03893	1.0795	1.03116	1.03948	1.019	1.06713
F_1345	2.30.1.13.2 CORYNEBACTERIUM	-1	yes	0.00840295	4.58073	5.24026	10.5617	0.0173919	0.0546866	1.15046	4.08812	0.0285114	4.30648	0.208367	2.1867	2.60048	1.47623	1.47623	1.07766	0	2.28085	2.28085	21.9454	0.158097	1.66818	0.681949	0.327258	0.00434799	3.06145	2.1828	0.0619539	0.149886	0.366167	0.202823	1.62056	0.727645	0.599539	0.0315984	1.83589	1.0204	1.16307	4.69974	0.442872	0.183775	0.000398633	0.279825	0.264505	0.493916	0.0123862
F_1387	2.30.1.5 ATOPOBIUM	2	no	2.52051	0.707332	0.688283	0.605637	2.62411	2.84902	1.37595	0.724322	1.88868	0.71645	1.42979	0.832967	0.896523	1.05406	1.05406	0.987356	2.28085	0	0	0.543728	1.5049	0.888164	1.10288	1.304	2.45291	0.771279	1.92384	1.73583	1.51913	1.27259	2.81431	0.431007	0.519213	3.82633	2.73479	0.425276	6.84568	3.48418	0.703613	5.07758	2.86177	2.23012	2.56739	1.36355	1.82029	2.57155
F_1388	2.30.1.5.2 ATP.MINUTUM	2	no	2.52051	0.707332	0.688283	0.605637	2.62411	2.84902	1.37595	0.724322	1.88868	0.71645	1.42979	0.832967	0.896523	1.05406	1.05406	0.987356	2.28085	0	0	0.543728	1.5049	0.888164	1.10288	1.304	2.45291	0.771279	1.92384	1.73583	1.51913	1.27259	2.81431	0.431007	0.519213	3.82633	2.73479	0.425276	6.84568	3.48418	0.703613	5.07758	2.86177	2.23012	2.56739	1.36355	1.82029	2.57155
F_1451	2.30.1.9 ARTHROBACTER_SUBDIVISION	1	yes	11.8477	0.0798308	0.0614189	0.0107173	9.46139	5.87408	1.08761	0.0986394	71.3939	0.0896362	9.03313	0.281943	0.431188	0.750067	0.750067	0.816592	21.9454	0.543728	0.543728	0	13.7416	0.427554	1.58296	4.60084	13.8682	0.163455	0.449615	50.2905	14.9038	3.90011	2.85086	0.739913	1.30938	1.4855	7.52303	0.490995	0.928874	0.850973	0.0760195	1.64534	3.02712	25.6343	2.33224	6.31061	1.61122	10.5836
F_1452	2.30.1.9.1 ARTHROBACTER_AND_RELATIVES	-1	yes	0.223122	21.657	25.1677	22.9242	0.253527	0.334578	1.15201	18.2534	0.059928	19.8254	0.00509341	5.07521	1.4756	1.16965	1.16965	1.08379	0.158097	1.5049	1.5049	13.7416	0	2.80686	0.386208	0.0498337	0.204226	10.5041	1.43495	0.027081	0.000151204	0.0727699	0.518768	1.24535	0.890287	0.810792	0.289364	1.27437	0.975346	1.03998	22.3909	0.681873	0.499866	0.144864	0.587827	0.0211158	0.74159	0.237836
F_1490	2.30.1.9.1.6 ARTHROBACTER	1	no	1.53936	0.200639	0.228533	0.345636	1.49119	1.38685	1.12805	0.175695	2.00376	0.18725	3.09255	0.0316511	0.776981	0.931024	0.931024	0.225362	1.66818	0.888164	0.888164	0.427554	2.80686	0	1.69678	3.5906	1.57265	0.108017	0.745442	2.2283	2.75877	3.64059	1.22557	0.956235	1.08966	1.10314	1.44136	0.754577	0.942641	0.932026	0.206095	1.06806	1.23894	1.70039	1.18106	3.37453	1.10054	1.51529
F_1491	2.30.1.9.1.6.1 ARB.GLOBIFORMIS	1	no	0.729782	1.98404	1.93049	1.71528	0.748971	0.793345	1.14066	2.03108	0.576148	2.00947	0.327613	2.11289	1.00704	1.01968	1.01968	0.41454	0.681949	1.10288	1.10288	1.58296	0.386208	1.69678	0	0.203562	0.716952	2.13988	0.976705	0.516394	0.396216	0.167238	0.870844	1.06322	1.00562	0.974692	0.76966	0.936088	0.953709	0.972753	1.9736	0.891504	0.863953	0.670709	0.894471	0.266663	0.940009	0.739275
F_1493	2.30.1.9.1.6.1.016 ArthrobacterSN16A	1	no	0.398498	10.6105	9.79403	6.2923	0.429541	0.507113	1.14786	11.1664	0.198005	10.937	0.0237529	6.92	1.23455	1.09609	1.09609	0.993485	0.327258	1.304	1.304	4.60084	0.0498337	3.5906	0.203562	0	0.378545	10.9408	1.20566	0.140504	0.0551938	0.00241808	0.663798	1.15586	0.943102	0.88422	0.464679	1.10718	0.964451	1.00741	10.4626	0.773458	0.648687	0.311733	0.717483	0.0064466	0.829674	0.413674
F_1514	2.30.1.9.2.1 ACTINOMYCES	-1	no	0.000669927	3.78152	4.24229	7.64628	0.00442374	0.0290756	1.14701	3.42964	0.0539375	3.58649	0.257475	1.99311	2.91679	1.56386	1.56386	1.07145	0.00434799	2.45291	2.45291	13.8682	0.204226	1.57265	0.716952	0.378545	0	2.67153	2.29715	0.0960002	0.195368	0.417079	0.156889	1.72812	0.693639	0.557853	0.0127989	1.93507	1.03214	1.19392	3.86551	0.400736	0.139291	0.00736054	0.230074	0.315352	0.445729	0.00208715
F_1530	2.30.1.9.2.1.2 ACT.NEUII	1	no	2.54409	0.0186204	0.0298765	0.0981563	2.36715	2.01261	1.11802	0.0105001	4.7429	0.0140197	12.2361	0.0249559	0.656609	0.877266	0.877266	0.541251	3.06145	0.771279	0.771279	0.163455	10.5041	0.108017	2.13988	10.9408	2.67153	0	0.631088	6.15749	10.1468	9.401	1.53615	0.891659	1.14759	1.19683	2.19304	0.659156	0.937046	0.90739	0.0206491	1.20284	1.57255	3.20129	1.41876	12.591	1.22084	2.45459
F_1563	2.30.2 THERMOANAEROBACTER_AND_RELATIVES	-2	no	2.33517	0.573603	0.557317	0.491908	2.38471	2.4418	2.09387	0.588469	1.8436	0.581542	1.34977	0.690121	0.101425	0.486325	0.486325	0.84964	2.1828	1.92384	1.92384	0.449615	1.43495	0.745442	0.976705	1.20566	2.29715	0.631088	0	1.68772	1.45098	1.16961	2.19771	1.15675	3.68417	1.17181	2.42371	0.367726	0.182072	0.219752	0.570392	0.651625	2.24072	2.14469	2.02287	1.27401	1.61164	2.36098
F_1645	2.30.3 SPOROMUSA_AND_RELATIVES	-1	yes	0.110948	12.4503	15.784	45.5386	0.136051	0.208409	1.15406	10.1872	0.0069703	11.1651	0.0544424	3.48396	1.77329	1.25411	1.25411	1.09441	0.0619539	1.73583	1.73583	50.2905	0.027081	2.2283	0.516394	0.140504	0.0960002	6.15749	1.68772	0	0.0232749	0.173848	0.396088	1.34844	0.83721	0.739525	0.167135	1.45785	0.988084	1.0761	13.0272	0.596926	0.375548	0.052929	0.47337	0.0918236	0.657198	0.122941
F_1646	2.30.3.1 SPOROMUSA	-1	yes	0.214069	21.3752	25.3044	24.9573	0.244234	0.325013	1.15222	17.8149	0.0543724	19.4379	0.00698827	4.93675	1.49327	1.17482	1.17482	1.08571	0.149886	1.51913	1.51913	14.9038	0.000151204	2.75877	0.396216	0.0551938	0.195368	10.1468	1.45098	0.0232749	0	0.0790705	0.510073	1.25166	0.886814	0.806054	0.27989	1.28599	0.976124	1.04223	22.1689	0.6761	0.491003	0.136892	0.579874	0.0247581	0.735947	0.228655
F_1663	2.30.3.1.2 VLN.PARVULA	1	no	0.436723	8.38279	7.71344	5.14005	0.467122	0.542285	1.14696	8.91507	0.234551	8.6807	0.0407805	6.74444	1.19817	1.08441	1.08441	0.956187	0.366167	1.27259	1.27259	3.90011	0.0727699	3.64059	0.167238	0.00241808	0.417079	9.401	1.16961	0.173848	0.0790705	0	0.691139	1.14168	0.952122	0.897026	0.501304	1.0806	0.96276	1.00216	8.2556	0.789828	0.676936	0.350627	0.741355	0.0166465	0.845166	0.451608
F_1667	2.30.3.1.2.004 Veillonellaratti	-1	no	0.139887	1.77198	1.85548	2.32256	0.114536	0.0584649	1.0937	1.70316	0.331553	1.73443	0.567741	1.35709	4.46478	2.84702	2.84702	1.0372	0.202823	2.81431	2.81431	2.85086	0.518768	1.22557	0.870844	0.663798	0.156889	1.53615	2.19771	0.396088	0.510073	0.691139	0	3.26943	0.461877	0.293358	0.0876967	2.00753	1.13425	1.46335	1.78773	0.194181	0.000719024	0.217312	0.0106149	0.615855	0.13576	0.127318
F_1671	2.30.3.1.2.010 Veillonellasp.	2	no	1.77621	0.85338	0.841459	0.786222	1.85971	2.1311	0.681374	0.863799	1.41885	0.858996	1.21205	0.926481	0.889846	0.673864	0.673864	1.00711	1.62056	0.431007	0.431007	0.739913	1.24535	0.956235	1.06322	1.15586	1.72812	0.891659	1.15675	1.34844	1.25166	1.14168	3.26943	0	0.687461	3.73028	1.96972	0.933727	1.82978	1.92536	0.851073	9.20236	3.0971	1.5918	4.08178	1.18256	6.74378	1.8156
F_1678	2.30.3.1.2.021 Veillonellasp.	2	no	0.679776	1.18482	1.19688	1.25584	0.657451	0.597449	0.602202	1.17446	0.80503	1.17921	0.90915	1.11562	5.31598	9.63262	9.63262	1.04797	0.727645	0.519213	0.519213	1.30938	0.890287	1.08966	1.00562	0.943102	0.693639	1.14759	3.68417	0.83721	0.886814	0.952122	0.461877	0.687461	0	0.864293	0.631025	1.67531	7.5666	30.1479	1.18713	1.94207	0.475144	0.737512	0.417263	0.926623	0.36942	0.66898
F_1679	2.30.3.1.3 SPM.PAUCIVORANS	-1	yes	0.541082	1.25951	1.28027	1.38507	0.514334	0.443992	0.440895	1.24187	0.697459	1.24995	0.836717	1.14458	2.43703	2.02891	2.02891	1.03838	0.599539	3.82633	3.82633	1.4855	0.810792	1.10314	0.974692	0.88422	0.557853	1.19683	1.17181	0.739525	0.806054	0.897026	0.293358	3.73028	0.864293	0	0.48308	2.86055	0.617317	0.766421	1.26348	0.30392	0.30752	0.611782	0.24728	0.861026	0.216884	0.528106
F_1683	2.30.3.1.4 PHA.FAECIUM	-1	no	0.00765676	2.87546	3.14197	4.89936	0.00220628	0.00342252	1.13773	2.66579	0.113325	2.75995	0.344946	1.74019	3.544	1.76077	1.76077	1.06085	0.0315984	2.73479	2.73479	7.52303	0.289364	1.44136	0.76966	0.464679	0.0127989	2.19304	2.42371	0.167135	0.27989	0.501304	0.0876967	1.96972	0.631025	0.48308	0	2.06981	1.0559	1.2561	2.9247	0.330252	0.0736926	0.0388223	0.150091	0.403168	0.359455	0.00459601
F_171	2.15.1.2.8 BAC.FRAGILIS	1	yes	1.97085	0.6089	0.594286	0.533312	2.02172	2.10975	14.3156	0.622082	1.5725	0.615958	1.21253	0.709049	0.154216	0.671329	0.671329	0.83784	1.83589	0.425276	0.425276	0.490995	1.27437	0.754577	0.936088	1.10718	1.93507	0.659156	0.367726	1.45785	1.28599	1.0806	2.00753	0.933727	1.67531	2.86055	2.06981	0	0.794735	0.665512	0.606033	1.02094	2.03641	1.8046	1.87637	1.1573	1.5135	1.99655
F_1713	2.30.4 EUBACTERIUM_AND_RELATIVES	-2	no	1.03716	0.934245	0.933464	0.930475	1.04553	1.06978	1.48694	0.934965	0.996717	0.934629	0.971256	0.93994	0.265786	0.418186	0.418186	0.947672	1.0204	6.84568	6.84568	0.928874	0.975346	0.942641	0.953709	0.964451	1.03214	0.937046	0.182072	0.988084	0.976124	0.96276	1.13425	1.82978	7.5666	0.617317	1.0559	0.794735	0	0.0364788	0.934091	0.283032	1.12728	1.01715	1.15935	0.967666	1.20444	1.04116
F_1714	2.30.4.1 C.COCCOIDES	-2	no	1.20707	0.892882	0.88839	0.867811	1.22897	1.29253	1.68903	0.89682	1.09982	0.895003	1.02798	0.920661	0.210832	0.241626	0.241626	0.951445	1.16307	3.48418	3.48418	0.850973	1.03998	0.932026	0.972753	1.00741	1.19392	0.90739	0.219752	1.0761	1.04223	1.00216	1.46335	1.92536	30.1479	0.766421	1.2561	0.665512	0.0364788	0	0.892012	0.317442	1.44495	1.15449	1.52754	1.01723	1.59787	1.21754
F_174	2.15.1.2.8.017 adhufec51	1	no	3.60588	5.43665e-05	0.000889885	0.0313458	3.25627	2.5943	1.11079	0.00174625	8.92251	0.000660072	20.5906	0.0874795	0.588363	0.843371	0.843371	0.657343	4.69974	0.703613	0.703613	0.0760195	22.3909	0.206095	1.9736	10.4626	3.86551	0.0206491	0.570392	13.0272	22.1689	8.2556	1.78773	0.851073	1.18713	1.26348	2.9247	0.606033	0.934091	0.892012	0	1.30154	1.84591	5.01327	1.60403	15.4605	1.30822	3.42745
F_1751	2.30.4.3 C.LENTOCELLUM	-2	yes	0.384331	1.2956	1.32675	1.48714	0.35886	0.296394	1.983	1.26929	0.548754	1.28132	0.713755	1.12707	0.945725	1.12759	1.12759	0.977795	0.442872	5.07758	5.07758	1.64534	0.681873	1.06806	0.891504	0.773458	0.400736	1.20284	0.651625	0.596926	0.6761	0.789828	0.194181	9.20236	1.94207	0.30392	0.330252	1.02094	0.283032	0.317442	1.30154	0	0.201022	0.455598	0.180149	0.744103	0.248303	0.371866
F_1754	2.30.4.4 EUBACTERIUM	-1	no	0.122988	1.82872	1.91996	2.43524	0.098881	0.046818	1.09822	1.75373	0.310859	1.78778	0.549914	1.37966	4.50287	2.69837	2.69837	1.03893	0.183775	2.86177	2.86177	3.02712	0.499866	1.23894	0.863953	0.648687	0.139291	1.57255	2.24072	0.375548	0.491003	0.676936	0.000719024	3.0971	0.475144	0.30752	0.0736926	2.03641	1.12728	1.44495	1.84591	0.201022	0	0.197917	0.0167671	0.599293	0.153217	0.111002
F_1763	2.30.4.5 C.LITUSEBURENSE	-1	yes	0.0124171	4.88021	5.62008	11.7732	0.0229372	0.0638323	1.15124	4.33173	0.0223152	4.57441	0.193985	2.25379	2.51361	1.45279	1.45279	1.0795	0.000398633	2.23012	2.23012	25.6343	0.144864	1.70039	0.670709	0.311733	0.00736054	3.20129	2.14469	0.052929	0.136892	0.350627	0.217312	1.5918	0.737512	0.611782	0.0388223	1.8046	1.01715	1.15449	5.01327	0.455598	0.197917	0	0.295125	0.249351	0.508096	0.0171535
F_1769	2.30.4.5.2 C.STICKLANDII	-1	yes	0.211089	1.59261	1.65294	1.98019	0.182049	0.113227	1.07648	1.54241	0.410906	1.56527	0.632218	1.28304	4.10896	3.58167	3.58167	1.03116	0.279825	2.56739	2.56739	2.33224	0.587827	1.18106	0.894471	0.717483	0.230074	1.41876	2.02287	0.47337	0.579874	0.741355	0.0106149	4.08178	0.417263	0.24728	0.150091	1.87637	1.15935	1.52754	1.60403	0.180149	0.0167671	0.295125	0	0.67521	0.0760754	0.19681
F_177	2.15.1.2.8.050 cloneHuCA36	1	no	0.335437	15.5541	14.8241	9.25783	0.367001	0.447429	1.14936	15.609	0.142383	15.6634	0.00557418	6.62106	1.30446	1.11806	1.11806	1.03948	0.264505	1.36355	1.36355	6.31061	0.0211158	3.37453	0.266663	0.0064466	0.315352	12.591	1.27401	0.0918236	0.0247581	0.0166465	0.615855	1.18256	0.926623	0.861026	0.403168	1.1573	0.967666	1.01723	15.4605	0.744103	0.599293	0.249351	0.67521	0	0.801716	0.350821
F_1772	2.30.4.5.2.010 Fusobacteriumalocis	-1	no	0.426371	1.30297	1.33047	1.47177	0.395514	0.314274	1.03957	1.27971	0.607829	1.29035	0.77255	1.15339	2.69952	7.47813	7.47813	1.019	0.493916	1.82029	1.82029	1.61122	0.74159	1.10054	0.940009	0.829674	0.445729	1.22084	1.61164	0.657198	0.735947	0.845166	0.13576	6.74378	0.36942	0.216884	0.359455	1.5135	1.20444	1.59787	1.30822	0.248303	0.153217	0.508096	0.0760754	0.801716	0	0.411401
F_1826	2.30.7 BACILLUS-LACTOBACILLUS-STREPTOCOCCUS_SUBDIVISION	-1	no	0.000393053	3.36033	3.72638	6.29643	0.000436339	0.015826	1.14381	3.07709	0.0756521	3.20376	0.29243	1.88074	3.15964	1.63513	1.63513	1.06713	0.0123862	2.57155	2.57155	10.5836	0.237836	1.51529	0.739275	0.413674	0.00208715	2.45459	2.36098	0.122941	0.228655	0.451608	0.127318	1.8156	0.66898	0.528106	0.00459601	1.99655	1.04116	1.21754	3.42745	0.371866	0.111002	0.0171535	0.19681	0.350821	0.411401	0
F_1851	2.30.7.11 B.SUBTILIS	-1	no	0.126909	1.81488	1.90421	2.40756	0.102498	0.0494638	1.09716	1.74141	0.315742	1.77477	0.554162	1.37419	4.49627	2.73216	2.73216	1.03851	0.188227	2.85137	2.85137	2.98357	0.504363	1.23571	0.865611	0.652299	0.143384	1.5637	2.23074	0.38041	0.495539	0.680334	0.000419641	3.13647	0.471959	0.304106	0.0769081	2.02986	1.12894	1.44933	1.83171	0.199295	4.0106e-05	0.202457	0.0151918	0.603246	0.149033	0.11478
F_1865	2.30.7.12.1.017 Staphylococcussp.	-1	no	0.289318	1.45925	1.50374	1.73927	0.258312	0.181204	1.06058	1.42196	0.488142	1.43897	0.690122	1.22504	3.57083	4.67086	4.67086	1.026	0.36017	2.27395	2.27395	1.98303	0.65072	1.14546	0.914148	0.764499	0.309215	1.32901	1.85243	0.546665	0.643608	0.785039	0.0419604	5.13321	0.3857	0.21791	0.223243	1.73335	1.18043	1.57434	1.4677	0.187273	0.0530841	0.375538	0.0108145	0.727828	0.0312761	0.274164
F_1890	2.30.7.17 LACTOBACILLI	1	no	2.05917	0.0619212	0.0804595	0.172562	1.94933	1.72192	1.12233	0.0466893	3.28224	0.0535774	7.08922	0.00182889	0.703968	0.899215	0.899215	0.434285	2.36838	0.817639	0.817639	0.248541	6.04484	0.0481499	2.1517	8.05999	2.13692	0.013423	0.675158	3.98159	5.86494	7.65678	1.39802	0.917996	1.12325	1.15692	1.83894	0.696543	0.939207	0.917423	0.0654281	1.14484	1.42362	2.44923	1.31437	7.92613	1.16924	2.00389
F_1901	2.30.7.17.3 L.DELBRUECKII	-1	yes	0.592886	1.07198	1.08531	1.15042	0.579088	0.547283	20.778	1.06054	0.686517	1.06579	0.780988	0.99586	0.548837	1.14169	1.14169	0.922728	0.625626	0.795087	0.795087	1.20913	0.762971	0.967588	0.878049	0.814277	0.601939	1.03092	0.838021	0.71434	0.759693	0.823291	0.513548	1.85155	1.08692	1.9784	0.564084	0.210347	0.901065	0.856899	1.07454	0.386728	0.513633	0.632871	0.522174	0.797988	0.604761	0.58609
F_1920	2.30.7.21 STREPTOCOCCI	-1	no	0.00102312	3.2624	3.6075	6.00083	7.6084e-05	0.0129518	1.14284	2.99451	0.0819511	3.11441	0.301811	1.85339	3.22696	1.65579	1.65579	1.06599	0.015202	2.60235	2.60235	9.90664	0.246954	1.5011	0.744961	0.422933	0.00334336	2.40284	2.37525	0.13052	0.237705	0.460667	0.119813	1.84096	0.662282	0.520095	0.00309926	2.01147	1.04369	1.22415	3.32577	0.364272	0.103876	0.0204245	0.188174	0.360251	0.40216	0.000148068
F_1962	2.30.8 MYCOPLASMA_AND_RELATIVES	1	yes	1.91646	0.0856083	0.106651	0.206294	1.8247	1.63262	1.12377	0.0678643	2.90235	0.0759499	5.79911	1.52696e-05	0.721133	0.906899	0.906899	0.389504	2.17156	0.834323	0.834323	0.285033	4.99844	0.0303066	2.10807	6.82123	1.98104	0.0261793	0.691453	3.44383	4.86323	6.6612	1.35357	0.927226	1.11496	1.1435	1.73183	0.710158	0.940005	0.920945	0.0896294	1.12553	1.37588	2.23753	1.28034	6.51452	1.15202	1.87036
F_1963	2.30.8.2 ACHOLEPLASMA-ANAEROPLASMA	1	no	1.19424	0.464435	0.494632	0.605834	1.17985	1.14702	1.13273	0.435834	1.3119	0.449287	1.47867	0.214345	0.848349	0.960163	0.960163	0.0321048	1.2305	0.955992	0.955992	0.67254	1.44767	0.0891938	0.767532	1.49477	1.20391	0.348098	0.816113	1.35742	1.44155	1.47617	1.09127	0.991335	1.06054	1.05769	1.16447	0.811357	0.946062	0.94543	0.470481	1.00445	1.09614	1.2391	1.07468	1.49799	1.04319	1.18711
F_1979	2.30.8.2.8 C.RAMOSUM_ASSEMBLAGE	1	no	1.60892	0.171087	0.197779	0.31237	1.5532	1.43335	1.1272	0.147463	2.1582	0.158376	3.51402	0.0191491	0.765289	0.926078	0.926078	0.261347	1.75915	0.876948	0.876948	0.394489	3.15169	0.00161603	1.81882	4.1355	1.64758	0.0848674	0.734029	2.43101	3.09099	4.1846	1.25048	0.950284	1.09476	1.11121	1.49582	0.745269	0.942085	0.929752	0.176286	1.07947	1.26552	1.79696	1.20053	3.87132	1.11079	1.58105
F_1994	2.30.8.3.7 SPP.CITRI	-2	no	1.47187	0.901801	0.893657	0.855645	1.51815	1.66342	0.539571	0.908903	1.26453	0.905631	1.1371	0.951283	0.643252	0.181141	0.181141	1.00494	1.38346	1.52376	1.52376	0.823431	1.15801	0.971198	1.04173	1.10146	1.44486	0.927812	0.605139	1.22178	1.16196	1.0924	2.20193	0.671136	3.96439	0.619653	1.57796	1.33758	0.447643	0.338847	0.900227	1.25052	2.12658	1.36682	2.53481	1.11845	3.57016	1.49381
F_2045	2.30.9 CLOSTRIDIUM_AND_RELATIVES	-1	yes	0.257106	21.3908	23.0713	16.8705	0.288194	0.369784	1.15123	19.0086	0.0823569	20.1848	0.000688083	5.59558	1.41542	1.15182	1.15182	1.0746	0.189456	1.45591	1.45591	10.4344	0.00204447	2.98734	0.349162	0.0322879	0.237625	11.7034	1.3795	0.0433909	0.00330421	0.051566	0.550089	1.22364	0.902483	0.827518	0.32448	1.23414	0.972676	1.03217	21.8183	0.702383	0.531849	0.175449	0.616294	0.0101426	0.761547	0.272187
F_2046	2.30.9.1 C.LEPTUM	-2	yes	0.513697	1.10496	1.12536	1.22465	0.507222	0.499629	12.4882	1.08747	0.585818	1.09549	0.689939	0.989161	0.354452	0.847335	0.847335	0.880929	0.534143	2.07329	2.07329	1.31268	0.668301	0.946821	0.817427	0.731746	0.518701	1.04227	0.374781	0.613905	0.664445	0.74344	0.540738	1.96731	1.93255	1.14952	0.502101	0.227302	0.316429	0.378534	1.10888	0.259838	0.532414	0.539461	0.579697	0.711008	0.714113	0.510321
F_2063	2.30.9.1.3 C.LEPTUM	-2	yes	0.51304	1.10658	1.12686	1.22558	0.506065	0.497039	14.1844	1.08919	0.587461	1.09717	0.692624	0.991412	0.376923	0.883994	0.883994	0.883631	0.534478	1.85841	1.85841	1.31314	0.670864	0.949272	0.820277	0.734575	0.518343	1.04425	0.426732	0.615964	0.666982	0.746291	0.534665	1.90264	1.77491	1.21386	0.500327	0.213871	0.360132	0.422585	1.11047	0.281122	0.526688	0.539984	0.572437	0.713779	0.705057	0.509425
F_2072	2.30.9.2 C.BOTULINUM	1	no	0.941363	0.950984	0.965915	1.00526	0.947228	0.959755	1.13677	0.93494	0.883166	0.942726	0.729948	0.72985	0.921744	0.988486	0.988486	0.0527788	0.925483	1.0246	1.0246	1.01869	0.774787	0.515055	0.153162	0.608448	0.937284	0.872681	0.890049	0.854166	0.781812	0.563501	0.978431	1.02551	1.03367	1.01666	0.953244	0.869422	0.949603	0.958452	0.954134	0.948076	0.976925	0.921476	0.98337	0.675495	0.991928	0.9443
F_2075	2.30.9.2.11 C.BARATI	1	yes	8.49154	0.0517759	0.0368206	0.0020395	7.04699	4.71554	1.09365	0.067623	45.7545	0.0599759	11.6874	0.236968	0.465339	0.77279	0.77279	0.790519	14.0442	0.578978	0.578978	0.00343739	18.5821	0.381535	1.65526	5.47002	9.66516	0.125103	0.4729	54.6126	20.2829	4.54197	2.52465	0.766905	1.2777	1.42544	5.81535	0.514672	0.929699	0.860733	0.0486291	1.55022	2.66057	15.9341	2.11693	7.80937	1.52733	7.73514
F_2079	2.30.9.2.11.3 C.PERFRINGENS	2	no	0.961176	1.04321	1.04408	1.04775	0.955199	0.938055	0.814522	1.04242	0.990759	1.04279	1.01042	1.03736	2.47814	2.50982	2.50982	1.03017	0.973268	0.406216	0.406216	1.05026	1.00717	1.03478	1.02488	1.0159	0.964779	1.04024	3.33319	0.9973	1.00656	1.01729	0.89306	0.439151	0.175066	1.70385	0.947843	1.0906	3.88131	5.9167	1.04338	2.80618	0.897913	0.975638	0.875589	1.01329	0.845447	0.958312
F_2094	2.30.9.2.6 C.BOTULINUM	1	no	3.76286	0.000491041	0.000226467	0.0264588	3.38514	2.6751	1.10991	0.00319723	9.66212	0.00163749	20.9277	0.095689	0.58082	0.839433	0.839433	0.667904	4.95512	0.696071	0.696071	0.0686153	23.8217	0.217148	1.95238	10.1433	4.04446	0.0250203	0.563926	14.3026	23.7533	7.99124	1.82048	0.846365	1.19189	1.27165	3.0286	0.600239	0.93378	0.890237	0.000218694	1.3138	1.88168	5.29947	1.62772	15.1934	1.31904	3.56986
F_2101	2.30.9.2.9 C.SUBTERMINALE	1	no	2.90376	0.00587624	0.0128946	0.0662766	2.67198	2.21719	1.11529	0.0017922	6.00278	0.00341175	16.0663	0.046899	0.629334	0.864071	0.864071	0.592479	3.5985	0.744358	0.744358	0.123892	14.5317	0.146434	2.0832	11.4469	3.0726	0.00364471	0.606389	8.14661	14.0781	9.35708	1.62806	0.875847	1.16269	1.22202	2.44698	0.637793	0.935838	0.901384	0.0070537	1.23988	1.6721	3.79037	1.48714	14.8255	1.25368	2.78613
F_227	2.15.2 SPHINGOBACTERIUM	1	no	0.546636	4.51383	4.21808	3.16069	0.574013	0.639901	1.14447	4.78132	0.350484	4.65776	0.115156	5.03589	1.11173	1.0559	1.0559	0.802497	0.481238	1.19681	1.19681	2.61877	0.161561	3.29235	0.0752667	0.0376324	0.528699	5.38908	1.08292	0.284789	0.170061	0.0213035	0.763958	1.1071	0.974931	0.929778	0.60428	1.01621	0.9587	0.989263	4.45532	0.832211	0.752448	0.466449	0.804158	0.0732814	0.88497	0.560097
F_257	2.15.6 CY.AURANTIACA	-2	yes	0.774463	0.961216	0.966313	0.990969	0.769968	0.761109	69.3422	0.956829	0.809035	0.958844	0.846489	0.931796	0.305787	0.803848	0.803848	0.90306	0.785963	0.856691	0.856691	1.01286	0.839284	0.920738	0.885314	0.859821	0.777544	0.945413	0.529189	0.81995	0.837974	0.863431	0.765206	1.75874	1.73084	2.20064	0.765452	0.127423	0.625686	0.549417	0.962196	0.405865	0.762748	0.78862	0.779147	0.853296	0.840036	0.772215
F_258	2.15.6.012 RunellaNS12	1	no	1.14667	0.96293	0.959732	0.944442	1.15957	1.19908	0.907002	0.965697	1.08632	0.964424	1.04632	0.981824	0.939985	0.703467	0.703467	1.00139	1.12152	0.841197	0.841197	0.930968	1.05308	0.98919	1.01432	1.0346	1.13906	0.972972	0.997577	1.0732	1.05434	1.03158	1.34003	0.450645	1.00025	1.41002	1.17599	0.987854	1.11634	1.1045	0.962314	1.52033	1.32033	1.11669	1.42964	1.04022	1.84761	1.15281
F_26	2.13 NITROSPINA_SUBDIVISION	-1	no	0.0227048	2.5294	2.7316	4.00264	0.0122447	3.0616e-05	1.13051	2.36823	0.153885	2.44084	0.394375	1.63096	3.90584	1.90641	1.90641	1.05519	0.0571584	2.85799	2.85799	5.74938	0.33886	1.3821	0.795468	0.511033	0.0309353	1.99735	2.44171	0.212427	0.329293	0.546055	0.0559684	2.14794	0.594256	0.440311	0.00409791	2.11225	1.07115	1.29611	2.56697	0.293325	0.04456	0.0664744	0.10994	0.451549	0.310011	0.017225
F_27	2.13.11 ENVIRONMENTAL_CLONE_MB1228	-1	no	0.274143	20.5436	21.3873	14.6141	0.305457	0.387057	1.15083	18.8054	0.0944739	19.7068	1.5799e-05	5.84962	1.38838	1.14371	1.14371	1.06873	0.205472	1.43365	1.43365	9.22644	0.00454426	3.07668	0.330877	0.024966	0.254449	12.1663	1.35417	0.0526957	0.00634344	0.0423402	0.565091	1.21376	0.908158	0.835347	0.341844	1.21573	0.971465	1.0286	20.8097	0.712056	0.547201	0.191143	0.629834	0.00618013	0.770909	0.289351
F_331	2.20 PLANCTOMYCES_AND_RELATIVES	-1	yes	0.249249	1.46885	1.52245	1.80038	0.234258	0.206939	6.04574	1.42376	0.384826	1.44435	0.571831	1.18442	1.26964	1.65474	1.65474	0.945292	0.290475	0.992506	0.992506	2.07308	0.532432	1.08808	0.815103	0.649311	0.2599	1.31087	1.54545	0.434874	0.525454	0.671349	0.21921	1.92767	0.668039	1.11188	0.219909	0.416839	1.29902	1.31835	1.47906	0.375197	0.212607	0.300555	0.255296	0.610634	0.412221	0.241669
F_36	2.13.11.038 cloneRB126	1	yes	1.32195	0.919858	0.913556	0.88374	1.35324	1.45173	0.925242	0.925329	1.18099	0.922811	1.09243	0.957564	0.791186	0.417073	0.417073	0.997468	1.26211	0.723576	0.723576	0.857897	1.10713	0.972483	1.02432	1.06721	1.30369	0.939797	0.933587	1.15152	1.10989	1.06075	1.83661	0.230308	1.19358	2.2244	1.3937	0.897319	1.11931	1.04831	0.918642	2.07763	1.77958	1.25081	2.11007	1.07927	3.71901	1.33678
F_384	2.21 CYANOBACTERIA_AND_CHLOROPLASTS	-1	no	0.00227434	4.01741	4.53436	8.45843	0.00778245	0.036727	1.1483	3.62535	0.0447188	3.79981	0.241013	2.0527	2.80737	1.53303	1.53303	1.07351	0.00195085	2.39563	2.39563	15.9904	0.188612	1.60248	0.705742	0.361626	0.000476711	2.78938	2.26177	0.0840638	0.179943	0.400351	0.171702	1.69027	0.705109	0.571826	0.018127	1.9033	1.02809	1.18329	4.11135	0.414648	0.153571	0.00410605	0.246345	0.29845	0.461867	0.00454983
F_403	2.21.2 CHLOROPLASTS_AND_CYANELLES	-1	no	0.0445361	7.04479	8.44309	22.2241	0.0623076	0.119587	1.15373	6.05253	0.0023169	6.48675	0.125299	2.67618	2.13145	1.35088	1.35088	1.08808	0.0148085	1.98898	1.98898	58.3645	0.0838803	1.89382	0.608289	0.233402	0.0346543	4.13588	1.93942	0.0171894	0.0774386	0.271158	0.294379	1.46684	0.784765	0.671385	0.0859577	1.64433	1.00252	1.1155	7.2913	0.519675	0.273863	0.0103975	0.374054	0.174825	0.577371	0.0528591
F_404	2.21.2.1 PSEUDANABAENA	-1	yes	0.0967868	1.93431	2.04048	2.65056	0.0749934	0.0301468	1.10561	1.84747	0.276764	1.88685	0.519457	1.42064	4.50565	2.48203	2.48203	1.04194	0.153424	2.91923	2.91923	3.37142	0.467772	1.26299	0.851781	0.62258	0.111768	1.6394	2.30671	0.3413	0.458662	0.652327	0.00506007	2.84243	0.498289	0.332579	0.0528139	2.07691	1.11551	1.41369	1.95426	0.214996	0.00197169	0.166866	0.0298957	0.570834	0.183557	0.0858924
F_430	2.25 FIBROBACTER_AND_ACIDOBACTERIUM	-1	no	0.0249701	2.49436	2.69037	3.91642	0.0139416	0.000170263	1.12957	2.33789	0.158909	2.40841	0.400125	1.61942	3.94626	1.92553	1.92553	1.05455	0.0605925	2.86959	2.86959	5.58694	0.344675	1.37574	0.798319	0.516332	0.0335476	1.97707	2.44109	0.217914	0.335107	0.551148	0.0526546	2.17128	0.589918	0.435318	0.00511177	2.11527	1.07301	1.30101	2.53081	0.289198	0.0415744	0.0701367	0.105535	0.457127	0.304225	0.0192167
F_431	2.25.1 FIBROBACTER_SUBDIVISION	-1	yes	0.149405	1.74304	1.82266	2.26589	0.123426	0.0652865	1.09124	1.67732	0.342837	1.70719	0.57727	1.34543	4.4332	2.93445	2.93445	1.03629	0.213399	2.78493	2.78493	2.76325	0.528907	1.21863	0.874461	0.671826	0.166755	1.51746	2.17359	0.407217	0.520308	0.698672	0.000213579	3.36967	0.454905	0.285984	0.0957406	1.99064	1.13799	1.47316	1.75807	0.190986	0.00171502	0.228051	0.00784049	0.624681	0.126553	0.136542
F_432	2.25.1.1 FIBROBACTER	-1	no	0.451967	1.28038	1.30557	1.43443	0.421541	0.340746	1.03658	1.25904	0.628558	1.2688	0.786071	1.14267	2.56296	8.0563	8.0563	1.01789	0.518137	1.74779	1.74779	1.5607	0.75664	1.09373	0.944034	0.840182	0.470989	1.20491	1.57377	0.676015	0.751267	0.854814	0.158204	6.83668	0.37174	0.224238	0.38581	1.47738	1.20744	1.5946	1.28519	0.266218	0.176495	0.531958	0.0943791	0.81373	0.00117411	0.437223
F_538	2.28 PROTEOBACTERIA	1	yes	1.90434	0.0879762	0.109238	0.20952	1.81408	1.62495	1.1239	0.0700104	2.87111	0.078202	5.69601	6.80055e-05	0.722676	0.907584	0.907584	0.385324	2.15499	0.835819	0.835819	0.288472	4.91523	0.0288463	2.10246	6.71281	1.96783	0.0275706	0.692925	3.40018	4.78354	6.5691	1.34971	0.928048	1.11422	1.14232	1.72266	0.711383	0.940077	0.921259	0.0920424	1.12384	1.37173	2.21976	1.27737	6.39858	1.1505	1.859
F_539	2.28.1 ALPHA_SUBDIVISION	1	yes	15.2725	0.467048	0.439204	0.324547	21.0783	71.7527	1.00226	0.492348	4.32108	0.48057	2.09096	0.665007	0.215497	0.454815	0.454815	0.946617	8.68562	0.303375	0.303375	0.244981	2.35737	0.760455	1.19036	1.70056	12.7755	0.564609	0.425666	3.38791	2.41109	1.6125	50.8992	0.394657	1.83331	2.94198	33.274	0.4158	0.954703	0.756656	0.46157	4.16844	75.6064	7.85234	17.6905	1.87745	4.31275	17.7416
F_580	2.28.1.6 RHIZOBIUM-AGROBACTERIUM	-1	no	0.0203987	5.42963	6.32439	14.1592	0.0332963	0.0796898	1.15228	4.77473	0.0139341	5.06357	0.171589	2.37048	2.38335	1.41794	1.41794	1.08235	0.00268594	2.15124	2.15124	33.2886	0.124546	1.75537	0.652111	0.28702	0.0137756	3.45022	2.08176	0.0398432	0.116997	0.325757	0.240907	1.54904	0.752848	0.630949	0.0517626	1.75421	1.01223	1.14145	5.58961	0.475827	0.221049	0.00101715	0.319702	0.225476	0.530326	0.0263074
F_582	2.28.1.6.10 BEI.INDICA	-1	yes	0.197703	20.5189	25.0193	29.1161	0.227365	0.307498	1.15257	16.8272	0.0448136	18.4777	0.0112285	4.68918	1.52728	1.18472	1.18472	1.08867	0.135209	1.54634	1.54634	17.4286	0.00121409	2.67222	0.414472	0.0656526	0.179399	9.48361	1.48147	0.0170129	0.000508796	0.0911899	0.49393	1.26372	0.88026	0.797141	0.26262	1.30809	0.977612	1.04653	21.3827	0.66529	0.474569	0.122685	0.565049	0.0321514	0.725346	0.212026
F_681	2.28.2 BETA_SUBDIVISION	-1	no	0.157342	1.68349	1.75973	2.18046	0.134829	0.0867401	1.60362	1.62042	0.33367	1.6491	0.556316	1.30027	1.83389	1.65922	1.65922	1.00046	0.214353	5.63163	5.63163	2.64391	0.50997	1.17741	0.843403	0.647316	0.172608	1.46652	1.0531	0.394215	0.501747	0.673226	0.0498082	4.26786	0.994612	0.305853	0.111432	1.43983	0.510583	0.657038	1.69789	0.0680306	0.0480679	0.227638	0.0698555	0.601888	0.21673	0.146138
F_748	2.28.3 GAMMA_SUBDIVISION	1	yes	1.54308	0.198926	0.226759	0.343742	1.49451	1.38935	1.128	0.174051	2.01189	0.185573	3.11422	0.0308647	0.776337	0.930753	0.930753	0.227351	1.67302	0.887547	0.887547	0.425685	2.82466	5.15863e-06	1.70395	3.61882	1.57665	0.106645	0.744812	2.2389	2.77593	3.66904	1.22692	0.955909	1.08994	1.10358	1.44428	0.754065	0.94261	0.931901	0.204369	1.06868	1.24038	1.70552	1.18212	3.40007	1.1011	1.51881
F_751	2.28.3.10 METHYLOMONAS	1	no	12.4967	0.084263	0.065391	0.0125066	9.91514	6.07987	1.08668	0.103461	74.2993	0.09428	8.71541	0.288467	0.426293	0.746658	0.746658	0.820061	23.5966	0.538649	0.538649	7.06147e-05	13.1607	0.434057	1.57316	4.49289	14.6978	0.169213	0.44645	48.337	14.2548	3.81945	2.9048	0.735869	1.31424	1.49489	7.83511	0.487686	0.928778	0.849526	0.0803638	1.66034	3.08806	27.6945	2.36724	6.12823	1.62447	11.1266
F_78	2.13.4.048 cloneABBB-96	-1	no	0.268764	1.48999	1.53802	1.79377	0.238104	0.162693	1.06447	1.4498	0.468627	1.46813	0.675883	1.23865	3.71533	4.34985	4.34985	1.02725	0.339401	2.35008	2.35008	2.06086	0.63518	1.15388	0.909433	0.753036	0.288525	1.3499	1.89476	0.528305	0.627846	0.774413	0.0320048	4.84485	0.39237	0.223615	0.203644	1.77	1.17548	1.56443	1.49911	0.183342	0.0419175	0.354816	0.00597292	0.714946	0.0411349	0.253759
F_813	2.28.3.20 PSEUDOALTEROMONAS	-1	yes	0.178743	1.6646	1.73398	2.11507	0.151108	0.0873469	1.08396	1.6071	0.376198	1.63326	0.604715	1.31328	4.29996	3.22336	3.22336	1.0337	0.245407	2.6858	2.6858	2.53348	0.55824	1.19936	0.88463	0.694763	0.196994	1.46632	2.10042	0.439838	0.549945	0.720148	0.00334768	3.69444	0.435462	0.265717	0.121151	1.93688	1.14873	1.50097	1.67772	0.18382	0.0071476	0.260449	0.00206464	0.649994	0.100686	0.16511
F_818	2.28.3.20.2 PAL.AURANTIA	-1	no	0.193805	1.62947	1.69439	2.04883	0.165466	0.0992121	1.08041	1.57556	0.392603	1.6001	0.61784	1.29861	4.21541	3.38455	3.38455	1.03248	0.261537	2.63144	2.63144	2.43414	0.572336	1.19051	0.889368	0.705639	0.212429	1.44319	2.06384	0.455737	0.5642	0.730307	0.00626906	3.87093	0.426586	0.256646	0.134518	1.90875	1.15383	1.51387	1.64175	0.181589	0.0111871	0.276719	0.000578201	0.662046	0.0887468	0.179847
F_863	2.28.3.24 AEROMONAS	-1	no	0.0826663	9.92591	12.3404	37.4752	0.105278	0.172739	1.15423	8.27075	0.00111075	8.98848	0.0786574	3.13319	1.89461	1.28728	1.28728	1.09295	0.0404299	1.82457	1.82457	68.3827	0.0454363	2.08789	0.552914	0.174393	0.0694688	5.24567	1.77955	0.00252974	0.0405485	0.209833	0.357339	1.38899	0.818308	0.714716	0.1339	1.52514	0.99307	1.08986	10.3451	0.568331	0.33664	0.0330599	0.436079	0.121264	0.628045	0.0934056
F_864	2.28.3.24.1 RUM.AMYLOPHILUS	-1	no	0.0865842	10.2554	12.7909	38.9502	0.109584	0.177826	1.15422	8.52149	0.00165347	9.27286	0.0748887	3.18083	1.87581	1.28217	1.28217	1.09325	0.0433121	1.81102	1.81102	66.3706	0.0424876	2.10736	0.54769	0.169307	0.0731164	5.36671	1.76577	0.00184619	0.0377524	0.204474	0.363013	1.38274	0.821152	0.718429	0.138595	1.515	0.992305	1.08776	10.6952	0.572578	0.342325	0.0356914	0.441578	0.116776	0.632402	0.0975184
F_895	2.28.3.27 ENTERICS_AND_RELATIVES	1	no	4.20999	0.00344833	0.00046526	0.0160705	3.74902	2.89905	1.10758	0.00864388	11.9491	0.00592395	20.8754	0.11725	0.561727	0.829271	0.829271	0.692959	5.70027	0.676924	0.676924	0.05172	26.7605	0.245065	1.8988	9.26628	4.55734	0.0375392	0.547805	18.2892	27.2709	7.30827	1.90882	0.834221	1.20432	1.29317	3.31939	0.585661	0.933011	0.88567	0.00263887	1.34623	1.9784	6.13962	1.69118	14.1559	1.34765	3.97373
F_930	2.28.3.27.7 PN.AGGLOMERANS	-1	no	0.317397	17.151	16.6608	10.4912	0.348972	0.429926	1.1498	16.8241	0.127616	17.071	0.00267348	6.42807	1.32726	1.1251	1.1251	1.04952	0.246915	1.38275	1.38275	6.99514	0.0150441	3.29258	0.285299	0.0106412	0.29737	12.6926	1.296	0.0794291	0.0181606	0.023	0.601389	1.19112	0.921472	0.853831	0.385291	1.17336	0.968704	1.02036	17.1218	0.735075	0.584426	0.231953	0.662346	0.000530644	0.79307	0.332771
[truncated: 44 more columns]

## Sheet: Csection
Feature	Name	Cluster ID	Selected	F_1003	F_119	F_1285	F_1334	F_1451	F_1452	F_1490	F_1491	F_1493	F_1513	F_1543	F_1546	F_1558	F_1563	F_1632	F_1638	F_1647	F_1663	F_1667	F_167	F_1713	F_1714	F_173	F_1751	F_1754	F_1763	F_177	F_1826	F_1862	F_1863	F_1890	F_1904	F_1962	F_1990	F_2045	F_2046	F_2063	F_2072	F_2075	F_2079	F_2094	F_257	F_450	F_455	F_471	F_503
F_1003	2.28.4 DELTA_SUBDIVISION	2	yes	0	5.40793	0.399114	0.377895	5.17224	0.0561323	0.0543989	1.36886	0.367681	4.70314	4.20474	1.08013	1.04071	0.186223	0.456269	0.38522	1.40683	1.36446	0.98051	0.853044	0.935855	1.09043	1.14191	0.345459	0.351162	1.03089	0.38226	0.0208423	0.690012	0.693598	2.95194	0.530762	2.62519	0.506722	2.42224	3.08869	3.40237	2.36224	1.57437	0.0705764	1.68728	0.0427721	0.216492	0.230088	0.226068	0.204713
F_119	2.15 FLEXIBACTER-CYTOPHAGA-BACTEROIDES	2	no	5.40793	0	2.72744	2.87141	0.000779678	7.52701	2.52654	0.22453	0.849334	0.0788847	0.111524	0.668329	0.580549	5.0358	2.39525	2.82027	0.446591	0.555194	0.78404	1.00794	1.29011	0.298435	0.69082	3.11792	3.07204	0.707921	1.14582	7.38736	1.31015	1.30696	0.234668	2.05589	0.075019	2.15582	0.509301	0.216673	0.180667	0.584873	1.67073	2.2747	0.699662	2.75553	4.5522	4.35645	4.413	4.73233
F_1285	2.30.1.10.1 PRP.ACNES	2	yes	0.399114	2.72744	0	0.000731353	2.56226	0.20977	0.586227	1.29696	0.874296	6.97667	9.33855	2.18399	2.07647	0.0723818	0.0054801	0.000314358	6.09667	5.23154	1.40952	0.673607	0.732343	1.20177	2.22822	0.00462984	0.00370379	1.52863	0.334601	0.282692	0.259886	0.264882	36.5382	0.030261	1.66448	0.0199406	12.3957	28.6746	18.6222	9.30361	1.06626	0.611846	5.78185	0.565269	0.0529631	0.0453158	0.0475099	0.0601166
F_1334	2.30.1.13 MYCOBACTERIUM_SUBDIVISION	2	yes	0.377895	2.87141	0.000731353	0	2.68792	0.190217	0.567679	1.31098	0.865381	7.79503	10.6576	2.0996	2.0234	0.0593904	0.0101759	8.682e-05	5.72516	4.8357	1.37942	0.682846	0.734082	1.20985	2.15807	0.00168694	0.00114712	1.50998	0.323883	0.261817	0.275897	0.28093	46.2123	0.0400346	1.70507	0.028101	12.4913	35.724	22.4431	9.32406	1.08192	0.59391	5.44079	0.54626	0.0417459	0.0349197	0.0368696	0.0482
F_1451	2.30.1.9 ARTHROBACTER_SUBDIVISION	2	no	5.17224	0.000779678	2.56226	2.68792	0	6.70208	2.48724	0.202241	0.819055	0.0941006	0.128888	0.678067	0.590097	4.53074	2.27019	2.64335	0.463111	0.571149	0.78907	1.00264	1.28128	0.273812	0.701218	2.90188	2.86217	0.715568	1.11053	6.73699	1.2839	1.28108	0.256297	1.96839	0.061153	2.05765	0.533959	0.23794	0.200981	0.609835	1.68055	2.23947	0.719144	2.71118	4.12413	3.95903	4.00677	4.27576
F_1452	2.30.1.9.1 ARTHROBACTER_AND_RELATIVES	2	no	0.0561323	7.52701	0.20977	0.190217	6.70208	0	0.204042	1.53217	0.594996	14.4056	12.6463	1.25247	1.24132	0.0457574	0.265456	0.196897	1.97019	1.79189	1.05478	0.811861	0.853313	1.28259	1.32992	0.161558	0.166487	1.1492	0.307613	0.0090696	0.567882	0.572245	6.7757	0.344332	2.70494	0.31812	3.93192	7.38269	8.84799	3.6106	1.43122	0.230843	2.20308	0.183274	0.0640991	0.072972	0.0703101	0.0567214
F_1490	2.30.1.9.1.6 ARTHROBACTER	2	no	0.0543989	2.52654	0.586227	0.567679	2.48724	0.204042	0	0.894953	0.153852	2.26174	2.1419	0.981672	0.925061	0.377639	0.634381	0.574126	1.12806	1.14492	0.936224	0.881005	1.00187	0.692949	1.03338	0.538546	0.54374	0.957135	0.464118	0.136078	0.782028	0.784887	1.80205	0.693667	1.65024	0.674929	1.77341	1.84304	1.93287	1.78852	1.65739	0.00112231	1.42002	0.00073636	0.411088	0.42559	0.421334	0.398272
F_1491	2.30.1.9.1.6.1 ARB.GLOBIFORMIS	2	no	1.36886	0.22453	1.29696	1.31098	0.202241	1.53217	0.894953	0	0.224769	0.468588	0.515503	0.801117	0.718964	1.45265	1.26096	1.3061	0.697559	0.785624	0.850852	0.944789	1.16103	0.00636331	0.834521	1.33312	1.32917	0.814101	0.75198	1.51177	1.02281	1.02327	0.644486	1.21767	0.0458591	1.23121	0.917933	0.62868	0.594485	0.98921	1.74097	0.820453	0.981153	0.955878	1.42898	1.4184	1.42152	1.43819
F_1493	2.30.1.9.1.6.1.016 ArthrobacterSN16A	2	no	0.367681	0.849334	0.874296	0.865381	0.819055	0.594996	0.153852	0.224769	0	1.04115	1.05699	0.886269	0.814537	0.751778	0.895986	0.868517	0.887677	0.948296	0.891835	0.912286	1.08048	0.151185	0.928087	0.850704	0.853383	0.882419	0.588049	0.509199	0.894462	0.896284	1.07735	0.920058	0.489088	0.912744	1.27281	1.07644	1.07306	1.32746	1.71989	0.129102	1.17995	0.175239	0.775207	0.784846	0.782048	0.766433
F_1513	2.30.1.9.2 ACTINOMYCES_AND_RELATIVES	-2	no	4.70314	0.0788847	6.97667	7.79503	0.0941006	14.4056	2.26174	0.468588	1.04115	0	0.00336066	0.550746	0.476118	23.1516	5.29893	7.49799	0.271306	0.374335	0.721533	1.08464	1.37172	0.549082	0.568098	9.32488	9.02806	0.620049	1.63547	8.85501	1.73938	1.72939	0.0541383	3.87366	0.272958	4.26455	0.269924	0.0440016	0.0261745	0.336894	1.50544	2.08327	0.47873	2.42538	20.1702	18.7089	19.1408	21.4074
F_1543	2.30.1.9.2.2 BIFIDOBACTERIUM	-2	no	4.20474	0.111524	9.33855	10.6576	0.128888	12.6463	2.1419	0.515503	1.05699	0.00336066	0	0.5239	0.455833	32.2265	6.74034	10.1754	0.237824	0.336135	0.706782	1.10657	1.38089	0.593926	0.541054	13.1931	12.6952	0.601744	1.75368	7.66969	1.88128	1.86873	0.0313103	4.66925	0.3197	5.22326	0.2295	0.0235761	0.0109688	0.293532	1.45915	1.98683	0.431955	2.28331	30.1328	28.3717	28.9263	31.3141
F_1546	2.30.1.9.2.2.3 BIF.BIFIDUM	-2	yes	1.08013	0.668329	2.18399	2.0996	0.678067	1.25247	0.981672	0.801117	0.886269	0.550746	0.5239	0	0.0596417	1.52746	2.43722	2.12816	0.119105	0.136779	0.0666575	0.780299	2.18974	0.816815	0.159992	1.98015	2.00035	0.579978	0.622123	1.17197	0.932587	0.932587	0.440008	2.81954	0.752419	2.69097	0.987734	0.451072	0.474304	1.20738	3.13433	0.971081	1.21851	0.99075	1.59986	1.63409	1.62385	1.57109
F_1558	2.30.1.9.2.2.5 BIF.INFANTIS	-2	yes	1.04071	0.580549	2.07647	2.0234	0.590097	1.24132	0.925061	0.718964	0.814537	0.476118	0.455833	0.0596417	0	1.54075	2.20828	2.04188	0.109695	0.200161	0.115885	0.878312	3.93694	0.736277	0.178761	1.94027	1.95499	0.733325	0.485022	1.14831	0.725418	0.723758	0.405219	2.33307	0.666361	2.30079	1.31709	0.410515	0.423167	1.64374	6.27879	0.91268	1.60907	0.935689	1.61324	1.64643	1.63658	1.5848
F_1563	2.30.2 THERMOANAEROBACTER_AND_RELATIVES	2	yes	0.186223	5.0358	0.0723818	0.0593904	4.53074	0.0457574	0.377639	1.45265	0.751778	23.1516	32.2265	1.52746	1.54075	0	0.113296	0.06374	3.05761	2.59845	1.16625	0.760032	0.781045	1.27983	1.61976	0.0418591	0.0447359	1.30544	0.277629	0.0921739	0.434912	0.439831	26.4153	0.179598	2.19877	0.156584	7.31106	30.1723	36.959	6.06962	1.2614	0.40721	3.14826	0.354019	0.0017096	0.00353034	0.00292718	0.00064796
F_1632	2.30.2.6 THERMOANAEROBACTER	2	yes	0.456269	2.39525	0.0054801	0.0101759	2.27019	0.265456	0.634381	1.26096	0.895986	5.29893	6.74034	2.43722	2.20828	0.113296	0	0.00839812	7.03717	6.50288	1.49899	0.647994	0.73094	1.18035	2.42236	0.0199885	0.0180366	1.57035	0.368947	0.340633	0.218966	0.223805	19.9818	0.0102407	1.56501	0.00460676	11.1444	16.5276	11.761	8.66842	1.02819	0.658193	6.72387	0.614809	0.0895445	0.0798624	0.0826636	0.0984172
F_1638	2.30.2.6.3 TAB.ETHANOLICUS	2	no	0.38522	2.82027	0.000314358	8.682e-05	2.64335	0.196897	0.574126	1.3061	0.868517	7.49799	10.1754	2.12816	2.04188	0.06374	0.00839812	0	5.85321	4.96788	1.38963	0.679674	0.733406	1.20705	2.1821	0.00253729	0.00186397	1.51658	0.327459	0.268983	0.270327	0.275348	42.637	0.0365248	1.69081	0.02514	12.4834	33.1042	21.0257	9.33072	1.07642	0.600149	5.55707	0.552862	0.0454735	0.0383601	0.0403954	0.0521725
F_1647	2.30.3.1.1 SLN.RUMINA	-2	no	1.40683	0.446591	6.09667	5.72516	0.463111	1.97019	1.12806	0.697559	0.887677	0.271306	0.237824	0.119105	0.109695	3.05761	7.03717	5.85321	0	0.0383654	0.232854	0.884972	1.71838	0.730887	0.197497	5.17072	5.26613	0.416768	0.772183	1.69517	1.78375	1.7753	0.151181	7.6882	0.599091	7.5917	0.447078	0.160866	0.183044	0.58253	3.02338	1.09993	0.557241	1.15245	3.37724	3.53221	3.48562	3.24884
F_1663	2.30.3.1.2 VLN.PARVULA	-2	no	1.36446	0.555194	5.23154	4.8357	0.571149	1.79189	1.14492	0.785624	0.948296	0.374335	0.336135	0.136779	0.200161	2.59845	6.50288	4.96788	0.0383654	0	0.200395	1.11221	1.48728	0.814722	0.128206	4.30338	4.39102	0.534076	0.960331	1.58519	2.30539	2.28504	0.224675	8.49575	0.697871	7.83999	0.42207	0.238647	0.268731	0.515337	2.00086	1.12233	0.460533	1.16445	2.83841	2.95605	2.92058	2.74163
F_1667	2.30.3.1.2.004 Veillonellaratti	-2	yes	0.98051	0.78404	1.40952	1.37942	0.78907	1.05478	0.936224	0.850852	0.891835	0.721533	0.706782	0.0666575	0.115885	1.16625	1.49899	1.38963	0.232854	0.200395	0	1.03452	2.49525	0.85851	0.110706	1.33639	1.34371	1.0618	0.58992	1.02057	0.511196	0.505883	0.659534	1.63516	0.826781	1.58881	1.51151	0.665859	0.679052	1.75856	2.77728	0.931371	2.09505	0.940369	1.19442	1.20759	1.20366	1.18328
F_167	2.15.1.2.7.089 Bacteroidesmerdae	-1	no	0.853044	1.00794	0.673607	0.682846	1.00264	0.811861	0.881005	0.944789	0.912286	1.08464	1.10657	0.780299	0.878312	0.760032	0.647994	0.679674	0.884972	1.11221	1.03452	0	0.589337	0.938411	1.42124	0.696668	0.694264	0.270509	0.475061	0.830045	0.607954	0.62783	1.19364	0.61349	0.965876	0.624695	1.29705	1.17998	1.15382	1.53113	1.4989	0.884253	1.57929	0.87826	0.748409	0.743149	0.744707	0.752944
F_1713	2.30.4 EUBACTERIUM_AND_RELATIVES	2	no	0.935855	1.29011	0.732343	0.734082	1.28128	0.853313	1.00187	1.16103	1.08048	1.37172	1.38089	2.18974	3.93694	0.781045	0.73094	0.733406	1.71838	1.48728	2.49525	0.589337	0	1.14565	2.30673	0.738036	0.737226	0.296634	0.856511	0.887212	1.51554	1.53766	1.37702	0.736057	1.2094	0.733574	0.522644	1.3807	1.38512	0.563991	0.446205	1.00989	0.580425	0.995137	0.769707	0.765123	0.766446	0.77393
F_1714	2.30.4.1 C.COCCOIDES	2	yes	1.09043	0.298435	1.20177	1.20985	0.273812	1.28259	0.692949	0.00636331	0.151185	0.549082	0.593926	0.816815	0.736277	1.27983	1.18035	1.20705	0.730887	0.814722	0.85851	0.938411	1.14565	0	0.851715	1.22228	1.22009	0.826753	0.717189	1.23784	0.996648	0.997403	0.712331	1.15345	0.0860527	1.16199	0.977423	0.698196	0.667263	1.04666	1.74045	0.632569	1.01671	0.742442	1.27018	1.26551	1.26691	1.27408
F_173	2.15.1.2.8.011 Bacteroidesfragilis	-2	no	1.14191	0.69082	2.22822	2.15807	0.701218	1.32992	1.03338	0.834521	0.928087	0.568098	0.541054	0.159992	0.178761	1.61976	2.42236	2.1821	0.197497	0.128206	0.110706	1.42124	2.30673	0.851715	0	2.05438	2.07227	1.01103	0.77225	1.24253	1.03172	1.02381	0.460288	2.66394	0.781406	2.59018	0.942048	0.470525	0.492486	1.07175	2.38598	1.02169	1.12427	1.0434	1.69324	1.7275	1.71729	1.66421
F_1751	2.30.4.3 C.LENTOCELLUM	2	no	0.345459	3.11792	0.00462984	0.00168694	2.90188	0.161558	0.538546	1.33312	0.850704	9.32488	13.1931	1.98015	1.94027	0.0418591	0.0199885	0.00253729	5.17072	4.30338	1.33639	0.696668	0.738036	1.22228	2.05438	0	5.20271e-05	1.47905	0.30963	0.230617	0.301061	0.30613	63.8051	0.0572411	1.77148	0.0429824	12.2191	49.4564	30.1179	9.12929	1.10744	0.565643	4.94896	0.516486	0.0270843	0.0215736	0.0231329	0.0324115
F_1754	2.30.4.4 EUBACTERIUM	2	no	0.351162	3.07204	0.00370379	0.00114712	2.86217	0.166487	0.54374	1.32917	0.853383	9.02806	12.6952	2.00035	1.95499	0.0447359	0.0180366	0.00186397	5.26613	4.39102	1.34371	0.694264	0.737226	1.22009	2.07227	5.20271e-05	0	1.48467	0.311949	0.236039	0.296581	0.301645	60.6903	0.0540223	1.7594	0.0401599	12.3015	46.8491	28.5975	9.18204	1.10281	0.570692	5.03246	0.521787	0.0294433	0.0236962	0.0253257	0.0349735
F_1763	2.30.4.5 C.LITUSEBURENSE	-1	no	1.03089	0.707921	1.52863	1.50998	0.715568	1.1492	0.957135	0.814101	0.882419	0.620049	0.601744	0.579978	0.733325	1.30544	1.57035	1.51658	0.416768	0.534076	1.0618	0.270509	0.296634	0.826753	1.01103	1.47905	1.48467	0	0.454229	1.0958	1.74742	1.79652	0.552053	1.59833	0.774855	1.59326	0.506841	0.557756	0.570692	0.688873	1.78838	0.948978	0.584756	0.964095	1.33986	1.3552	1.35067	1.32651
F_177	2.15.1.2.8.050 cloneHuCA36	-1	no	0.38226	1.14582	0.334601	0.323883	1.11053	0.307613	0.464118	0.75198	0.588049	1.63547	1.75368	0.622123	0.485022	0.277629	0.368947	0.327459	0.772183	0.960331	0.58992	0.475061	0.856511	0.717189	0.77225	0.30963	0.311949	0.454229	0	0.334274	0.436499	0.444996	2.06957	0.425639	0.874917	0.405878	4.28701	2.03634	1.95617	6.28825	8.31493	0.475384	3.29332	0.45489	0.278703	0.279981	0.279553	0.277991
F_1826	2.30.7 BACILLUS-LACTOBACILLUS-STREPTOCOCCUS_SUBDIVISION	2	no	0.0208423	7.38736	0.282692	0.261817	6.73699	0.0090696	0.136078	1.51177	0.509199	8.85501	7.66969	1.17197	1.14831	0.0921739	0.340633	0.268983	1.69517	1.58519	1.02057	0.830045	0.887212	1.23784	1.24253	0.230617	0.236039	1.0958	0.334274	0	0.619917	0.623977	4.60361	0.419664	2.81118	0.393742	3.16438	4.92085	5.67189	2.98983	1.4955	0.159534	1.95458	0.118269	0.116279	0.127493	0.124155	0.106752
F_1862	2.30.7.12 STAPHYLOCOCCUS	-1	no	0.690012	1.31015	0.259886	0.275897	1.2839	0.567882	0.782028	1.02281	0.894462	1.73938	1.88128	0.932587	0.725418	0.434912	0.218966	0.270327	1.78375	2.30539	0.511196	0.607954	1.51554	0.996648	1.03172	0.301061	0.296581	1.74742	0.436499	0.619917	0	0.000106141	2.54684	0.172551	1.11289	0.186436	5.96109	2.43049	2.22065	6.3115	1.7001	0.793225	28.3889	0.772653	0.408059	0.39625	0.399727	0.418411
F_1863	2.30.7.12.1 STAPHYLOCOCCUS	-1	no	0.693598	1.30696	0.264882	0.28093	1.28108	0.572245	0.784887	1.02327	0.896284	1.72939	1.86873	0.932587	0.723758	0.439831	0.223805	0.275348	1.7753	2.28504	0.505883	0.62783	1.53766	0.997403	1.02381	0.30613	0.301645	1.79652	0.444996	0.623977	0.000106141	0	2.52048	0.177047	1.11229	0.191061	5.87074	2.40674	2.2014	6.17163	1.68514	0.795987	26.9375	0.775591	0.413047	0.401262	0.404732	0.423374
F_1890	2.30.7.17 LACTOBACILLI	-2	no	2.95194	0.234668	36.5382	46.2123	0.256297	6.7757	1.80205	0.644486	1.07735	0.0541383	0.0313103	0.440008	0.405219	26.4153	19.9818	42.637	0.151181	0.224675	0.659534	1.19364	1.37702	0.712331	0.460288	63.8051	60.6903	0.552053	2.06957	4.60361	2.54684	2.52048	0	10.4192	0.462794	12.6477	0.136314	0.000577058	0.00540316	0.189432	1.3068	1.70577	0.294481	1.88825	37.766	44.3125	42.2842	32.8348
F_1904	2.30.7.17.6 L.PLANTARUM	2	no	0.530762	2.05589	0.030261	0.0400346	1.96839	0.344332	0.693667	1.21767	0.920058	3.87366	4.66925	2.81954	2.33307	0.179598	0.0102407	0.0365248	7.6882	8.49575	1.63516	0.61349	0.736057	1.15345	2.66394	0.0572411	0.0540223	1.59833	0.425639	0.419664	0.172551	0.177047	10.4192	0	1.45341	0.00112544	8.38716	9.10458	7.1078	6.98617	0.987332	0.71484	7.65605	0.676166	0.151326	0.139452	0.142911	0.162018
F_1962	2.30.8 MYCOPLASMA_AND_RELATIVES	2	no	2.62519	0.075019	1.66448	1.70507	0.061153	2.70494	1.65024	0.0458591	0.489088	0.272958	0.3197	0.752419	0.666361	2.19877	1.56501	1.69081	0.599091	0.697871	0.826781	0.965876	1.2094	0.0860527	0.781406	1.77148	1.7594	0.774855	0.874917	2.81118	1.11289	1.11229	0.462794	1.45341	0	1.48746	0.74915	0.444067	0.404715	0.82441	1.7312	1.50689	0.873924	1.77061	2.10186	2.06104	2.07294	2.13855
F_1990	2.30.8.3 SPIROPLASMA	2	yes	0.506722	2.15582	0.0199406	0.028101	2.05765	0.31812	0.674929	1.23121	0.912744	4.26455	5.22326	2.69097	2.30079	0.156584	0.00460676	0.02514	7.5917	7.83999	1.58881	0.624695	0.733574	1.16199	2.59018	0.0429824	0.0401599	1.59326	0.405878	0.393742	0.186436	0.191061	12.6477	0.00112544	1.48746	0	9.31375	10.882	8.27379	7.5848	0.999457	0.696984	7.43393	0.65673	0.129617	0.118386	0.121652	0.13978
F_2045	2.30.9 CLOSTRIDIUM_AND_RELATIVES	1	yes	2.42224	0.509301	12.3957	12.4913	0.533959	3.93192	1.77341	0.917933	1.27281	0.269924	0.2295	0.987734	1.31709	7.31106	11.1444	12.4834	0.447078	0.42207	1.51151	1.29705	0.522644	0.977423	0.942048	12.2191	12.3015	0.506841	4.28701	3.16438	5.96109	5.87074	0.136314	8.38716	0.74915	9.31375	0	0.145636	0.168228	0.00836696	0.417823	1.71195	0.0663252	1.82732	8.31248	8.78193	8.64225	7.91444
F_2046	2.30.9.1 C.LEPTUM	-2	yes	3.08869	0.216673	28.6746	35.724	0.23794	7.38269	1.84304	0.62868	1.07644	0.0440016	0.0235761	0.451072	0.410515	30.1723	16.5276	33.1042	0.160866	0.238647	0.665859	1.17998	1.3807	0.698196	0.470525	49.4564	46.8491	0.557756	2.03634	4.92085	2.43049	2.40674	0.000577058	9.10458	0.444067	10.882	0.145636	0	0.00245695	0.200342	1.32721	1.74023	0.311862	1.93532	42.4772	48.9493	47.0023	37.2764
F_2063	2.30.9.1.3 C.LEPTUM	-2	no	3.40237	0.180667	18.6222	22.4431	0.200981	8.84799	1.93287	0.594485	1.07306	0.0261745	0.0109688	0.474304	0.423167	36.959	11.761	21.0257	0.183044	0.268731	0.679052	1.15382	1.38512	0.667263	0.492486	30.1179	28.5975	0.570692	1.95617	5.67189	2.22065	2.2014	0.00540316	7.1078	0.404715	8.27379	0.168228	0.00245695	0	0.226116	1.36988	1.8152	0.349095	2.03901	47.1513	50.5879	49.7005	43.4082
F_2072	2.30.9.2 C.BOTULINUM	2	yes	2.36224	0.584873	9.30361	9.32406	0.609835	3.6106	1.78852	0.98921	1.32746	0.336894	0.293532	1.20738	1.64374	6.06962	8.66842	9.33072	0.58253	0.515337	1.75856	1.53113	0.563991	1.04666	1.07175	9.12929	9.18204	0.688873	6.28825	2.98983	6.3115	6.17163	0.189432	6.98617	0.82441	7.5848	0.00836696	0.200342	0.226116	0	0.307053	1.73283	0.0551513	1.83717	6.72952	7.03023	6.94129	6.47037
F_2075	2.30.9.2.11 C.BARATI	2	yes	1.57437	1.67073	1.06626	1.08192	1.68055	1.43122	1.65739	1.74097	1.71989	1.50544	1.45915	3.13433	6.27879	1.2614	1.02819	1.07642	3.02338	2.00086	2.77728	1.4989	0.446205	1.74045	2.38598	1.10744	1.10281	1.78838	8.31493	1.4955	1.7001	1.68514	1.3068	0.987332	1.7312	0.999457	0.417823	1.32721	1.36988	0.307053	0	1.6656	0.442813	1.65019	1.22836	1.21412	1.21829	1.241
F_2079	2.30.9.2.11.3 C.PERFRINGENS	2	yes	0.0705764	2.2747	0.611846	0.59391	2.23947	0.230843	0.00112231	0.820453	0.129102	2.08327	1.98683	0.971081	0.91268	0.40721	0.658193	0.600149	1.09993	1.12233	0.931371	0.884253	1.00989	0.632569	1.02169	0.565643	0.570692	0.948978	0.475384	0.159534	0.793225	0.795987	1.70577	0.71484	1.50689	0.696984	1.71195	1.74023	1.8152	1.73283	1.6656	0	1.39246	0.00367423	0.440491	0.45486	0.450647	0.427762
F_2094	2.30.9.2.6 C.BOTULINUM	1	yes	1.68728	0.699662	5.78185	5.44079	0.719144	2.20308	1.42002	0.981153	1.17995	0.47873	0.431955	1.21851	1.60907	3.14826	6.72387	5.55707	0.557241	0.460533	2.09505	1.57929	0.580425	1.01671	1.12427	4.94896	5.03246	0.584756	3.29332	1.95458	28.3889	26.9375	0.294481	7.65605	0.873924	7.43393	0.0663252	0.311862	0.349095	0.0551513	0.442813	1.39246	0	1.44383	3.41979	3.55102	3.51158	3.31089
F_257	2.15.6 CY.AURANTIACA	2	no	0.0427721	2.75553	0.565269	0.54626	2.71118	0.183274	0.00073636	0.955878	0.175239	2.42538	2.28331	0.99075	0.935689	0.354019	0.614809	0.552862	1.15245	1.16445	0.940369	0.87826	0.995137	0.742442	1.0434	0.516486	0.521787	0.964095	0.45489	0.118269	0.772653	0.775591	1.88825	0.676166	1.77061	0.65673	1.82732	1.93532	2.03901	1.83717	1.65019	0.00367423	1.44383	0	0.3875	0.402066	0.397788	0.374652
F_450	2.27 SPIROCHETES_AND_RELATIVES	2	yes	0.216492	4.5522	0.0529631	0.0417459	4.12413	0.0640991	0.411088	1.42898	0.775207	20.1702	30.1328	1.59986	1.61324	0.0017096	0.0895445	0.0454735	3.37724	2.83841	1.19442	0.748409	0.769707	1.27018	1.69324	0.0270843	0.0294433	1.33986	0.278703	0.116279	0.408059	0.413047	37.766	0.151326	2.10186	0.129617	8.31248	42.4772	47.1513	6.72952	1.22836	0.440491	3.41979	0.3875	0	0.000328019	0.000163407	0.000253067
F_455	2.27.3 SPIROCHAETA-TREPONEMA-BORRELIA_SUBDIVISION	2	no	0.230088	4.35645	0.0453158	0.0349197	3.95903	0.072972	0.42559	1.4184	0.784846	18.7089	28.3717	1.63409	1.64643	0.00353034	0.0798624	0.0383601	3.53221	2.95605	1.20759	0.743149	0.765123	1.26551	1.7275	0.0215736	0.0236962	1.3552	0.279981	0.127493	0.39625	0.401262	44.3125	0.139452	2.06104	0.118386	8.78193	48.9493	50.5879	7.03023	1.21412	0.45486	3.55102	0.402066	0.000328019	0	2.84024e-05	0.00115669
F_471	2.27.3.2 TREPONEMA	2	yes	0.226068	4.413	0.0475099	0.0368696	4.00677	0.0703101	0.421334	1.42152	0.782048	19.1408	28.9263	1.62385	1.63658	0.00292718	0.0826636	0.0403954	3.48562	2.92058	1.20366	0.744707	0.766446	1.26691	1.71729	0.0231329	0.0253257	1.35067	0.279553	0.124155	0.399727	0.404732	42.2842	0.142911	2.07294	0.121652	8.64225	47.0023	49.7005	6.94129	1.21829	0.450647	3.51158	0.397788	0.000163407	2.84024e-05	0	0.000822866
F_503	2.27.3.2.6 STR.MPSP16	2	yes	0.204713	4.73233	0.0601166	0.0482	4.27576	0.0567214	0.398272	1.43819	0.766433	21.4074	31.3141	1.57109	1.5848	0.00064796	0.0984172	0.0521725	3.24884	2.74163	1.18328	0.752944	0.77393	1.27408	1.66421	0.0324115	0.0349735	1.32651	0.277991	0.106752	0.418411	0.423374	32.8348	0.162018	2.13855	0.13978	7.91444	37.2764	43.4082	6.47037	1.241	0.427762	3.31089	0.374652	0.000253067	0.00115669	0.000822866	0
F_538	2.28 PROTEOBACTERIA	1	no	3.01259	0.539819	9.58525	10.1385	0.566977	5.1224	2.12075	1.0151	1.46002	0.291772	0.25389	0.975379	1.13023	9.15875	7.89113	9.95598	0.623673	0.58444	1.28382	1.96868	1.30213	1.08795	0.904242	10.7999	10.7038	1.30016	18.0276	4.05305	3.31149	3.23915	0.17667	5.80555	0.812948	6.43293	0.0981755	0.183258	0.200707	0.072211	0.330304	2.03802	0.186102	2.19363	10.0076	10.3362	10.2433	9.69355
F_539	2.28.1 ALPHA_SUBDIVISION	-2	yes	3.74719	0.147676	13.1655	15.4301	0.166798	10.5209	2.02585	0.559438	1.06744	0.0131386	0.00324958	0.497019	0.437269	38.4754	8.91159	14.5955	0.206942	0.29908	0.691829	1.13093	1.38537	0.635049	0.514477	19.9095	19.0211	0.584405	1.86737	6.52514	2.0502	2.03441	0.0146644	5.77769	0.365996	6.59008	0.194122	0.00947589	0.00230364	0.254934	1.41119	1.89205	0.386474	2.14715	41.9801	41.6666	41.8827	41.2718
F_580	2.28.1.6 RHIZOBIUM-AGROBACTERIUM	2	yes	0.510181	0.646313	0.955363	0.95012	0.616745	0.74078	0.255197	0.127525	0.0116851	0.873536	0.901795	0.86629	0.791782	0.872701	0.967506	0.95198	0.841011	0.909059	0.88234	0.919476	1.09865	0.0755845	0.906078	0.94119	0.942847	0.866482	0.621347	0.658736	0.921806	0.923354	0.960523	0.979856	0.330168	0.976239	1.18225	0.954684	0.940813	1.24213	1.72854	0.222835	1.132	0.282571	0.890104	0.897064	0.895057	0.883666
F_583	2.28.1.6.11 METHYLOBACTERIA	2	no	0.0525993	2.55887	0.583146	0.564527	2.51893	0.200923	1.60402e-05	0.903928	0.156935	2.28474	2.16182	0.982982	0.926594	0.374134	0.631509	0.570998	1.13156	1.14773	0.936823	0.880606	1.00089	0.700231	1.03482	0.535296	0.540507	0.958141	0.462762	0.133382	0.780662	0.783532	1.81428	0.691104	1.6678	0.672262	1.78112	1.85613	1.94789	1.79549	1.65636	0.00140655	1.42345	0.000535087	0.407594	0.422107	0.417848	0.39477
F_587	2.28.1.6.11.2 MLB.RADIOTOLERANS	-2	no	4.93111	0.0655151	6.19922	6.86984	0.079633	14.8454	2.31537	0.446453	1.03181	0.000707582	0.00713212	0.562799	0.48573	19.5658	4.80244	6.62712	0.287162	0.391867	0.728097	1.07545	1.36621	0.527581	0.580383	8.10915	7.86995	0.628539	1.58199	9.33731	1.68264	1.67363	0.0664535	3.58597	0.251858	3.92284	0.28974	0.0552919	0.0352073	0.357931	1.52551	2.12588	0.500172	2.48947	16.8516	15.6258	15.9841	17.9293
F_637	2.28.1.8 RHODOBACTER-RHODOVULUM-HYPHOMONAS-RICKETTSIA	-1	no	0.448141	1.51829	0.147486	0.147678	1.46453	0.31275	0.570587	0.96012	0.741162	2.41711	2.70416	1.01081	0.918446	0.205745	0.153878	0.147461	1.40662	1.52232	0.767683	0.384784	0.57931	0.913617	1.11281	0.150493	0.149782	0.558713	0.0743731	0.366415	0.29092	0.299298	3.81615	0.17894	1.12661	0.168625	6.07274	3.65527	3.32743	8.55206	2.79961	0.586583	5.22616	0.557369	0.189962	0.183707	0.185504	0.195794
F_657	2.28.1.8.5 RICKETTSIA_AND_OTHERS	-1	no	0.643842	1.10337	0.349284	0.357497	1.08489	0.552326	0.713658	0.895245	0.798923	1.38786	1.47424	0.466107	0.410533	0.456861	0.331087	0.354582	0.799366	1.00054	0.344793	0.257558	1.09803	0.87574	0.65968	0.371323	0.368788	0.569219	0.170063	0.59105	0.144655	0.150651	1.8296	0.318619	0.961773	0.320973	4.58467	1.77314	1.6654	6.77003	3.453	0.722164	9.24061	0.706535	0.438545	0.430635	0.432954	0.445554
F_681	2.28.2 BETA_SUBDIVISION	2	yes	0.556427	1.95777	0.0438923	0.055344	1.8804	0.373097	0.713286	1.20363	0.927438	3.51214	4.16704	2.95926	2.35697	0.205891	0.0189207	0.0512649	7.6413	9.14316	1.68696	0.601569	0.739549	1.14449	2.73447	0.0749429	0.0713188	1.59895	0.448259	0.447761	0.159194	0.163532	8.59796	0.00135836	1.41891	0.00494474	7.43311	7.62314	6.10276	6.33542	0.975477	0.733489	7.76229	0.696558	0.176404	0.163917	0.167562	0.187593
F_725	2.28.2.8 BORDETELLA	2	yes	0.804149	1.3131	0.353911	0.37492	1.29294	0.690893	0.885513	1.08708	0.981393	1.63313	1.73595	3.09237	1.91562	0.557886	0.296298	0.367691	3.08657	4.58318	2.06896	0.541122	0.808444	1.06582	2.38166	0.406641	0.401097	1.3201	0.740036	0.739993	0.214994	0.217032	2.20797	0.219361	1.15932	0.24435	2.17169	2.1262	1.97816	2.08713	0.913129	0.895222	3.05761	0.877353	0.529311	0.516511	0.520295	0.540411
F_732	2.28.2.8.4 BRD.BRONCHISEPTICA	2	yes	0.90988	1.13759	0.629482	0.64558	1.12964	0.849091	0.950784	1.04401	0.996449	1.25515	1.28992	1.99701	1.48101	0.770681	0.58288	0.64009	1.75873	2.12744	1.74533	0.664741	0.864393	1.03466	1.66896	0.669099	0.665053	1.11915	0.890715	0.876043	0.504661	0.506331	1.43488	0.513571	1.07504	0.537138	1.37582	1.41129	1.36705	1.3479	0.921981	0.955527	1.59628	0.946776	0.752638	0.744399	0.746845	0.759703
F_748	2.28.3 GAMMA_SUBDIVISION	1	yes	2.84869	0.558551	9.8441	10.2844	0.585442	4.7108	2.0457	1.01935	1.43799	0.307241	0.267335	1.00448	1.18298	8.36053	8.30259	10.1443	0.627011	0.578868	1.33414	2.01894	1.23167	1.08858	0.919901	10.7228	10.6693	1.28292	17.4279	3.77064	3.61831	3.53333	0.181736	6.18298	0.825561	6.83822	0.086556	0.189586	0.209535	0.0597213	0.319457	1.97032	0.162848	2.11196	9.20897	9.55987	9.45878	8.88738
F_805	2.28.3.16 MRB.HYDROCARBONOCLASTICUS	2	no	1.87918	0.141235	1.45382	1.4785	0.122739	1.99247	1.23408	0.011376	0.345923	0.36762	0.41553	0.778319	0.694115	1.75589	1.39204	1.46987	0.650534	0.74407	0.839643	0.954404	1.18361	0.034742	0.809608	1.51825	1.51108	0.795717	0.806615	2.02185	1.06319	1.06319	0.554271	1.32049	0.0116833	1.34258	0.836013	0.536707	0.499252	0.909571	1.73862	1.13206	0.930372	1.31804	1.7047	1.68267	1.68912	1.72427
F_813	2.28.3.20 PSEUDOALTEROMONAS	-2	no	2.8203	0.253593	48.1889	61.5489	0.275528	6.21374	1.76141	0.66032	1.07787	0.0656032	0.0403882	0.428748	0.400383	22.7745	24.842	56.7002	0.141957	0.210705	0.653073	1.20848	1.37216	0.726386	0.450039	82.0546	79.028	0.546602	2.09946	4.3049	2.67895	2.64953	0.000618157	12.1279	0.481902	14.9959	0.127827	0.00238699	0.00964273	0.179278	1.28598	1.67147	0.277027	1.84175	32.5398	38.4529	36.5908	28.2399
F_837	2.28.3.23 VIBRIO	1	no	2.50573	0.540761	16.1509	16.0561	0.566245	4.09967	1.83633	0.960625	1.32357	0.290955	0.247991	0.872913	0.997746	7.96941	14.6815	16.1295	0.461383	0.411286	1.13558	2.24991	1.33131	1.0215	0.719963	15.2724	15.4585	1.27983	9.4013	3.28179	4.45402	4.31211	0.146322	10.6958	0.787678	12.0478	0.0742976	0.156821	0.181819	0.0516309	0.407831	1.77325	0.12219	1.8917	9.23282	9.85007	9.66457	8.7225
F_895	2.28.3.27 ENTERICS_AND_RELATIVES	1	yes	3.35733	0.406568	21.2996	24.4341	0.432918	6.96151	2.16239	0.88835	1.37535	0.175111	0.141986	0.843745	0.98191	19.6162	14.2087	23.3401	0.415405	0.415466	1.14925	1.57516	0.973326	0.965775	0.771868	29.0268	28.287	0.841183	7.21172	4.97835	3.69339	3.62135	0.0804834	8.50881	0.678345	9.98318	0.0380096	0.0849379	0.0979685	0.0387278	0.433557	2.05951	0.149544	2.25409	24.188	26.264	25.6575	22.3734
F_896	2.28.3.27.1 BUCHNERA	-2	no	5.46752	0.0355779	4.70993	5.12529	0.0464883	14.3897	2.44397	0.386535	0.99979	0.00935771	0.0236907	0.593697	0.51164	12.6721	3.81337	4.97594	0.330063	0.437869	0.744757	1.05348	1.34861	0.468237	0.612225	5.87283	5.73031	0.650948	1.44642	10.1145	1.55316	1.5463	0.104106	2.98772	0.197792	3.22136	0.345331	0.0905007	0.0649414	0.416344	1.57433	2.22626	0.556391	2.64477	10.9108	10.1842	10.394	11.5763
F_911	2.28.3.27.11 KLEBSIELLA	1	no	1.56852	0.759603	4.74175	4.43932	0.77702	1.95881	1.36024	1.0035	1.16788	0.554184	0.508301	1.00278	1.16793	2.65615	5.70311	4.54058	0.600243	0.468275	1.45249	4.05582	1.15131	1.03331	0.843254	4.02826	4.09634	1.30215	3.7193	1.77228	13.2076	12.3047	0.365729	7.23586	0.912387	6.72058	0.19565	0.384577	0.424034	0.155604	0.512655	1.33844	0.0767971	1.37902	2.85621	2.95329	2.92408	2.77586
F_912	2.28.3.27.11.2 ENB.ASBURIAE	1	no	1.56852	0.759603	4.74175	4.43932	0.77702	1.95881	1.36024	1.0035	1.16788	0.554184	0.508301	1.00278	1.16793	2.65615	5.70311	4.54058	0.600243	0.468275	1.45249	4.05582	1.15131	1.03331	0.843254	4.02826	4.09634	1.30215	3.7193	1.77228	13.2076	12.3047	0.365729	7.23586	0.912387	6.72058	0.19565	0.384577	0.424034	0.155604	0.512655	1.33844	0.0767971	1.37902	2.85621	2.95329	2.92408	2.77586
F_914	2.28.3.27.11.2.017 Enterobactersp.	1	no	1.43989	0.803697	3.54466	3.3507	0.818573	1.72039	1.28454	1.00615	1.13663	0.622015	0.579538	1.04538	1.19509	2.19717	4.17328	3.41554	0.649826	0.502299	1.51483	4.57632	1.09637	1.03012	0.87141	3.08788	3.13141	1.25694	2.91757	1.58786	14.6644	13.7185	0.441339	5.28242	0.931896	4.88505	0.259493	0.460259	0.499158	0.218026	0.562912	1.26801	0.104653	1.29874	2.32987	2.39378	2.37458	2.27675
F_919	2.28.3.27.13 XENORHABDUS	1	no	1.32085	0.845154	2.65273	2.53684	0.857112	1.51383	1.21029	1.00384	1.10208	0.694447	0.657776	0.864098	0.960639	1.82673	3.02666	2.57564	0.681342	0.540112	1.10198	8.31509	1.3713	1.02211	0.73897	2.37876	2.40504	1.59172	2.34958	1.42362	5.67344	5.46315	0.533578	3.69947	0.946605	3.45432	0.416089	0.551089	0.586547	0.365183	0.680279	1.19835	0.244419	1.22052	1.91119	1.95153	1.93944	1.8775
F_930	2.28.3.27.7 PN.AGGLOMERANS	-2	yes	2.45293	0.316952	132.035	138.223	0.339434	4.77464	1.64107	0.708412	1.07719	0.109431	0.0772145	0.393921	0.3898	13.9692	62.3671	139.198	0.118135	0.169224	0.632983	1.26245	1.34931	0.768444	0.419694	104.592	112.299	0.532567	2.16084	3.5095	3.21301	3.17029	0.0112159	22.3787	0.542131	30.1756	0.108635	0.0167989	0.0317132	0.154533	1.22109	1.56903	0.224493	1.70494	18.9009	21.902	20.951	16.737
F_932	2.28.3.27.8 WIGGLESWORTHIA_SYMBIONT	1	no	1.56224	0.787675	4.16199	3.94806	0.804617	1.92274	1.36591	1.02422	1.18242	0.587715	0.54311	0.985272	1.08367	2.54004	4.79394	4.02049	0.68692	0.543405	1.25541	6.05437	1.5163	1.05299	0.760331	3.6457	3.6967	1.95147	4.28242	1.75172	6.12456	5.82897	0.405181	5.64556	0.936058	5.38177	0.264466	0.423326	0.461418	0.206455	0.506709	1.34522	0.153963	1.38372	2.7104	2.79196	2.7675	2.64236
F_935	2.28.3.4 THIOBACILLUS	1	no	1.32569	0.840408	2.70969	2.58702	0.8526	1.52333	1.21274	1.00216	1.10232	0.686621	0.64914	1.04534	1.16443	1.84548	3.10909	2.62803	0.674576	0.515541	1.42597	4.79737	1.06348	1.02078	0.842112	2.4205	2.44812	1.2096	2.24886	1.43086	10.9558	10.4898	0.521867	3.8433	0.943821	3.57329	0.347189	0.539851	0.576222	0.307232	0.637436	1.20054	0.164241	1.22318	1.93287	1.97467	1.96213	1.89798
F_936	2.28.3.4.1 THB.FERROOXIDANS	1	no	1.26079	0.871909	2.24779	2.16461	0.882153	1.41048	1.17327	1.00556	1.08613	0.739939	0.706909	1.07122	1.16215	1.64673	2.51535	2.19248	0.737407	0.58304	1.42797	4.77286	1.05765	1.02066	0.8804	2.05075	2.06972	1.2076	1.9781	1.34096	7.49896	7.30381	0.591668	2.99951	0.957896	2.82208	0.422081	0.608272	0.641513	0.381318	0.679295	1.16372	0.228326	1.18142	1.70943	1.73923	1.73031	1.68447
F_976	2.28.3.8 XANTHOMONAS	2	no	0.303545	3.49328	0.0145527	0.00881474	3.2251	0.126837	0.49935	1.36298	0.829557	11.947	17.6605	1.84144	1.83186	0.0234618	0.0372468	0.0106332	4.50762	3.72838	1.28561	0.714004	0.745494	1.23836	1.92786	0.00281021	0.00362431	1.43588	0.295034	0.191647	0.334656	0.339737	76.9645	0.0833559	1.86614	0.0663539	11.2514	66.0265	42.9003	8.54318	1.14332	0.52742	4.37755	0.476595	0.0126566	0.00894417	0.00997104	0.0164331
[truncated: 25 more columns]
