# Supplementary material for: A Generic Multivariate Framework for the Integration of Microbiome Longitudinal Studies With Other Data Types
Source: Front Genet. 2019 Nov 7;10:963. doi: 10.3389/fgene.2019.00963 (PMC6875829; doi:10.3389/fgene.2019.00963)
Supplement: Supplementary file 3 [file Table_2.xls]

## Sheet: PLS
Feature	Taxonomy	Cluster ID	Selected	M106T894	M129T1196	M179T1018	M205T1473	M207T1196	M229T1227	M266T1372	M271T1466	M285T1569	M290T1524	M291T1584	M292T1383	M299T1033	M308T1437	M310T1500	M357T2099	M369T1850	M379T1799	M398T1643	M415T2220	OTU_1	OTU_10	OTU_107	OTU_11	OTU_13	OTU_130	OTU_14	OTU_15	OTU_16	OTU_169	OTU_17	OTU_18	OTU_19	OTU_2	OTU_20	OTU_21	OTU_22	OTU_24	OTU_25	OTU_26	OTU_28	OTU_29	OTU_30	OTU_304	OTU_31	OTU_33
M106T894		2	yes	0	0.0114625809615901	0.134571821659952	0.0063889555994002	0.0302287697963014	0.0432594224811386	0.165935831394751	0.0211211055884855	0.0439460801715724	0.091399465252615	0.0972902673461688	0.096904492636081	0.0187692516502965	0.104097425769038	0.0252746531084393	0.169379527241459	0.106908890432808	0.145813055020383	0.0279251093305239	0.010103888581371	0.869227228510389	0.663564456538333	0.838500474740684	1.02942609699034	0.864112569503701	0.816488479716187	0.763519299688297	0.746110281848286	0.75210676465885	1.01080365950192	0.596832590591852	0.792091206577211	0.988333588047453	0.765225287313848	0.542777581382965	0.721826070631041	0.866011008588481	0.766858053325187	0.690473616489905	0.675358522908826	0.707129115177133	0.788963645173586	1.06365560038827	1.00143549238683	0.923624428436345	0.580649513113752
M129T1196		-1	no	0.0114625809615901	0	0.0883536860742639	0.00789646297962501	0.0150408746993621	0.0311861793345274	0.106294036572658	0.0113905061787742	0.0308321902927232	0.0552096648895819	0.0616582961553998	0.0581516653936328	0.0289052245598011	0.0635330147349079	0.02603095306598	0.113697552646603	0.0657999773993075	0.0925338157855632	0.0170067416701477	0.000181060451627405	0.748167142867735	0.612054517220912	0.803947922768208	0.914542182455978	0.792345425322429	0.889783941054981	0.669921173396467	0.679743426536658	0.672005361891125	1.07026878154438	0.734525367840937	0.690868593761534	0.921302235603794	0.712944358372934	0.589450451960012	0.817020742589346	0.950610954584093	0.828326461141211	0.615245554457231	0.750076380872616	0.786269047944321	0.869716162872615	0.958663228705322	1.01360513672403	0.840979705055681	0.691132791673326
M179T1018		-1	yes	0.134571821659952	0.0883536860742639	0	0.118411688010002	0.0975716182111265	0.113570783220448	0.0161452599954647	0.0893957082243804	0.119339271758128	0.0114152477871032	0.0158070791325488	0.0149730799927594	0.171418873517393	0.0164476940049263	0.16745910773714	0.00615886389700849	0.0163685040596839	0.00865640847327473	0.106266522202903	0.0960251298994284	0.391146807538487	0.365216730246294	0.58017321164506	0.553539535803571	0.471897430406126	1.27398380953599	0.378879646694948	0.462012579985064	0.347215590068711	1.44785838325475	1.45436660866014	0.358354099097329	0.685594559413109	0.397345215819291	0.831921570037989	1.27314704000537	1.29702553250858	1.14926618639076	0.32179145679421	1.13870788889388	1.17720473856937	1.28584613264102	0.669182109337021	1.05708784974525	0.503913801091626	1.06985730023226
M205T1473		1	yes	0.0063889555994002	0.00789646297962501	0.118411688010002	0	0.0196232089318003	0.0257396606166661	0.131607982812807	0.0194262515042251	0.0267628095529132	0.0765198767543301	0.0755051161997106	0.0805400927504428	0.0212544319500346	0.0824160636696754	0.0141138349350626	0.140259078118479	0.0849166022137664	0.124872470650918	0.0177494863461171	0.00754176438675591	0.804929373633769	0.681724111719684	0.826763890008736	0.983616926301237	0.872472195799171	0.827594827787597	0.706688120663359	0.710721886701078	0.723025334367964	1.01406100048762	0.677505666309251	0.722490027681635	0.978289811254602	0.77173153952284	0.5305640434723	0.768840740011085	0.904932531511788	0.772149506089732	0.64150318758552	0.642238426079099	0.719241142888096	0.802383685004722	1.02098033171048	1.00926359499785	0.915543700499517	0.633788678552698
M207T1196		2	yes	0.0302287697963014	0.0150408746993621	0.0975716182111265	0.0196232089318003	0	0.011091537408197	0.102489647762249	0.0146270342114297	0.00667990949341055	0.0615218337770658	0.0649262457976065	0.0737475229020758	0.0370959595098475	0.0757434805469555	0.0291518063392886	0.119186553602407	0.0780921097361397	0.0936469579384483	0.00297374671456254	0.0157151391795196	0.801667239883954	0.597846070222565	0.830195071286258	0.910985868030376	0.811544188787258	0.875741593491047	0.643923249658537	0.683729782693149	0.672026709602532	1.01711639141732	0.766573585715814	0.679265600997046	0.940368566527454	0.840658516489412	0.563270836026427	0.826086759485375	0.930602580322271	0.797720662271925	0.57227608369619	0.701361774350164	0.764879918024316	0.779356343795957	0.970390270108456	1.02127039853859	0.847860260416591	0.706958062652589
M229T1227		1	yes	0.0432594224811386	0.0311861793345274	0.113570783220448	0.0257396606166661	0.011091537408197	0	0.10763524737813	0.0391464311250199	0.00163859727815678	0.0796937945363734	0.0717257007945637	0.0886935625897618	0.0471259542946428	0.0840536837529373	0.0314476064647827	0.125474475607614	0.0862161810727916	0.111020563044517	0.0044289432198825	0.0320852337679804	0.820976524442903	0.623264846773141	0.819600281647282	0.903371929466468	0.890163748569249	0.77009375888645	0.630160280408994	0.697029815495023	0.656152450616323	0.94845877407196	0.787882598671522	0.656754014644724	0.989631364812657	0.957153968007523	0.513396736494163	0.797278167728306	0.915949109246723	0.747821746074985	0.555155235398009	0.636675580536378	0.693680014006649	0.721835194188904	1.01924174698451	1.02262784155406	0.882835065650264	0.708299070207935
M266T1372		1	no	0.165935831394751	0.106294036572658	0.0161452599954647	0.131607982812807	0.102489647762249	0.10763524737813	0	0.111038656138334	0.114217097962513	0.0140325674247507	0.00916211083179457	0.0157930506213438	0.166526220307751	0.0112765326781792	0.147454813066079	0.0144887231522265	0.0108983829017747	0.0055506198402305	0.110551208921135	0.115644929799396	0.369925716666213	0.409932281441328	0.573373859833179	0.54532012829738	0.505111471292506	1.32909250534199	0.371283480807647	0.400697695434931	0.362062008558006	1.42147258966461	1.50901872110409	0.324602494559109	0.676664654889775	0.421169524581773	0.780606608365336	1.43785806548835	1.35083122394079	1.22593530821055	0.295803781966745	1.04743003172814	1.21217808681159	1.30306712236778	0.619045414342524	1.07852005685882	0.51283243044122	1.14506828950832
M271T1466		2	yes	0.0211211055884855	0.0113905061787742	0.0893957082243804	0.0194262515042251	0.0146270342114297	0.0391464311250199	0.111038656138334	0	0.0336398796634038	0.0563373393203414	0.0674731894369783	0.073387616165614	0.0363822080231825	0.0815385906774309	0.0397507931402579	0.11912508101615	0.0841167304010842	0.0937319980755094	0.0221988505564702	0.0117275824429833	0.780385711301306	0.58448674263296	0.804147977049494	0.938662319344349	0.753757999815856	0.957803242070135	0.658544225524281	0.673246678205012	0.670493356668737	1.09236320110253	0.699612384869793	0.685767273464627	0.917886939895426	0.736746994129096	0.617204637379603	0.800995715283288	0.938647560981007	0.810566450693773	0.580899877658209	0.750320127566065	0.796826020383765	0.785879671588471	0.949272834684244	1.01690990231862	0.825510301572903	0.669519782899171
M285T1569		1	yes	0.0439460801715724	0.0308321902927232	0.119339271758128	0.0267628095529132	0.00667990949341055	0.00163859727815678	0.114217097962513	0.0336398796634038	0	0.0828518003162735	0.077982140438472	0.0949954978503565	0.0476836492168686	0.0917214578888755	0.0317723707864328	0.132735536002403	0.0940689613743092	0.115193761608914	0.00367032921376901	0.0314307286990633	0.838831150677891	0.628372639515613	0.844168263352224	0.925567262388867	0.886664143471757	0.790412866595654	0.642259707385334	0.707230333586976	0.680982685398745	0.950116262752939	0.775226189197915	0.677679985329174	0.989310606613506	0.971155529660066	0.514125669560696	0.786629395459011	0.909168719717107	0.743463644869179	0.568993479105691	0.636184959385331	0.698786231097275	0.713481984384315	1.02049023357429	1.02114935507138	0.893671893461047	0.703684704680015
M290T1524		-1	yes	0.091399465252615	0.0552096648895819	0.0114152477871032	0.0765198767543301	0.0615218337770658	0.0796937945363734	0.0140325674247507	0.0563373393203414	0.0828518003162735	0	0.00367423109658351	0.005098858726126	0.102100166316297	0.00668035244507956	0.0989552187007488	0.0232313725330989	0.00703959379639047	0.00646736762629781	0.0706772962527461	0.061710529967948	0.460950652445897	0.436404974570635	0.615155016601176	0.640975515115345	0.537640113204616	1.24474282016725	0.445455366145689	0.467008901400193	0.42796748685541	1.34847440917355	1.1675979014614	0.405374690668371	0.734030131017173	0.445517120020334	0.740072511555986	1.21761640061858	1.20489819298359	1.1262936069304	0.360470058812307	1.00036500289805	1.10190137575126	1.16482687892445	0.707713889262976	1.05806240791756	0.570212339297567	0.942439905367066
M291T1584		-2	yes	0.0972902673461688	0.0616582961553998	0.0158070791325488	0.0755051161997106	0.0649262457976065	0.0717257007945637	0.00916211083179457	0.0674731894369782	0.077982140438472	0.00367423109658351	0	0.00635514013441214	0.102327816660029	0.00399972544313864	0.0921968196889828	0.0220638791848494	0.00420576857616409	0.00901262971085137	0.0698611070141702	0.0686773149457638	0.442877948912503	0.449385043381449	0.603815710125836	0.625008020142212	0.55956040507905	1.2073144940829	0.432991904615017	0.448972965635944	0.416003389952076	1.33143303265026	1.22029293316068	0.385616879327843	0.733144404484164	0.454834253547876	0.711404566700361	1.25665134078917	1.21961754330011	1.12359650133221	0.343441971216567	0.934359724802954	1.0801869677271	1.17161459248234	0.696405345832322	1.06389314367098	0.573720168271914	0.959684767165655
M292T1383		-1	yes	0.096904492636081	0.0581516653936328	0.0149730799927594	0.0805400927504428	0.0737475229020758	0.0886935625897618	0.0157930506213438	0.073387616165614	0.0949954978503565	0.005098858726126	0.00635514013441214	0	0.108263728593825	0.00152318417707416	0.102425326536719	0.0251759129212706	0.00164469374217829	0.0102228745990893	0.0806406609499156	0.0647766817811299	0.43654558752278	0.448387490087626	0.620221490910738	0.625545317625882	0.552668154486389	1.22415145080252	0.461189414362796	0.466620759219519	0.431926436530225	1.36224659814882	1.21248757128104	0.413911392586157	0.722814739343406	0.422216812837419	0.755262358971054	1.24233755260746	1.22085033304734	1.16133427890362	0.384176065861736	1.01000629413215	1.11580645175774	1.28424936304227	0.702011569985219	1.05549602537443	0.571692779566492	0.9733773275611
M299T1033		-1	no	0.0187692516502965	0.0289052245598011	0.171418873517393	0.0212544319500346	0.0370959595098475	0.0471259542946428	0.166526220307751	0.0363822080231825	0.0476836492168686	0.102100166316297	0.102327816660029	0.108263728593825	0	0.113333991791137	0.00994194832528309	0.214438633301592	0.11606044174599	0.154125719358373	0.0340684471736824	0.0281484453007558	0.929850987029117	0.707156915772046	0.847217537337687	1.06946515157483	0.915233075238282	0.85640772030608	0.838734162134617	0.681210943503052	0.82835007226535	0.984024995402589	0.508080342478694	0.805772045502881	0.990909321607582	0.81240927014618	0.512926629461797	0.787638463870627	0.847852862459429	0.820948265567562	0.687902625652061	0.639411180368609	0.729423354752476	0.748996153729319	1.02701062861484	1.019469883765	0.943281974177139	0.573925913403069
M308T1437		-2	yes	0.104097425769038	0.0635330147349079	0.0164476940049263	0.0824160636696754	0.0757434805469555	0.0840536837529373	0.0112765326781792	0.0815385906774309	0.0917214578888755	0.00668035244507956	0.00399972544313864	0.00152318417707416	0.113333991791137	0	0.101134228528531	0.0219385094962334	1.95113423842191e-05	0.0101209163211059	0.0807361142396699	0.0705983561672449	0.423884602627692	0.455887724070848	0.613841423309327	0.612469219666188	0.562268262454961	1.19785158056495	0.445192275682975	0.45645889533901	0.421695462198246	1.34784487503689	1.27201311506429	0.39721997808289	0.723372221768679	0.429347119284266	0.727966743752443	1.27789295045912	1.2378395572468	1.15529731449535	0.370323983504297	0.981368428778364	1.10793507713019	1.28808309979451	0.693801658627764	1.05911248009292	0.573050948501444	0.999246030909558
M310T1500		1	yes	0.0252746531084393	0.02603095306598	0.16745910773714	0.0141138349350626	0.0291518063392886	0.0314476064647827	0.147454813066079	0.0397507931402579	0.0317723707864328	0.0989552187007488	0.0921968196889828	0.102425326536719	0.00994194832528309	0.101134228528531	0	0.190980144072847	0.103688897263949	0.147645100335767	0.0267994629376892	0.0257844572435547	0.861466540083205	0.765948885522148	0.855018040926652	1.0484179755884	0.957006208415987	0.836972462025555	0.77687255772287	0.678676186461628	0.816175141081123	0.967418050715501	0.608557513055469	0.757386632866269	0.997967880859807	0.850137896047914	0.493122496416471	0.799273588730463	0.887511757312833	0.804191002195543	0.670779029077231	0.597386996078097	0.712518049100629	0.777010840941292	1.00949732195984	1.01963888177795	0.973798237776403	0.618844810206062
M357T2099		-2	yes	0.169379527241459	0.113697552646603	0.00615886389700849	0.140259078118479	0.119186553602407	0.125474475607614	0.0144887231522265	0.11912508101615	0.132735536002403	0.0232313725330989	0.0220638791848494	0.0251759129212706	0.214438633301592	0.0219385094962334	0.190980144072847	0	0.0215282865797467	0.0155316710077479	0.127528076200799	0.122510240514655	0.340253010663776	0.37861459649321	0.564331958930782	0.519489589632426	0.470234789736554	1.27368737286237	0.329959858343572	0.444571332774232	0.318382916414192	1.46713944896079	1.7609892330842	0.316408893183624	0.672870351417017	0.393767848010649	0.828372901093441	1.32878295929046	1.38427313481757	1.15172115011036	0.29608940742913	1.1139610688606	1.18536167868486	1.37256664917126	0.640516570042594	1.06009672906947	0.496871780664125	1.16611017562267
M369T1850		1	no	0.106908890432808	0.0657999773993075	0.0163685040596839	0.0849166022137664	0.0780921097361397	0.0862161810727916	0.0108983829017747	0.0841167304010842	0.0940689613743092	0.00703959379639047	0.00420576857616409	0.00164469374217829	0.11606044174599	1.95113423842191e-05	0.103688897263949	0.0215282865797467	0	0.00994089008049764	0.0831136325469384	0.0729891765703307	0.41913569251222	0.453673933092539	0.611016594894332	0.607780747828986	0.558837150695849	1.20403791445508	0.442179838392329	0.453268940960419	0.418203815104809	1.35380825756444	1.28494955146971	0.393403417799141	0.720012518260128	0.425065259577045	0.731082122357121	1.28837163713515	1.2441162545647	1.16276869392414	0.367383873417571	0.986969923984933	1.11523990529875	1.29939380566633	0.68969220236622	1.0598660139255	0.569030543696571	1.00648693571288
M379T1799		-1	yes	0.145813055020383	0.0925338157855632	0.00865640847327473	0.124872470650918	0.0936469579384483	0.111020563044517	0.0055506198402305	0.0937319980755094	0.115193761608914	0.00646736762629781	0.00901262971085137	0.0102228745990893	0.154125719358373	0.0101209163211059	0.147645100335767	0.0155316710077479	0.00994089008049764	0	0.104720694513392	0.101112852486363	0.395135945782257	0.390151794007523	0.585944590754524	0.564975063024305	0.488698992258159	1.33798174010503	0.399190383196043	0.423749900152051	0.374549695429257	1.43098221149722	1.39638725155001	0.357311492925379	0.678348371919785	0.410628108275815	0.804450437620886	1.3772426015691	1.30474753693791	1.22459410701389	0.318433702135302	1.126093797029	1.2190787197851	1.29573514332013	0.639730692368185	1.07049904335653	0.509648354352637	1.08662489232703
M398T1643		2	yes	0.0279251093305239	0.0170067416701477	0.106266522202903	0.0177494863461171	0.00297374671456254	0.0044289432198825	0.110551208921135	0.0221988505564702	0.00367032921376901	0.0706772962527461	0.0698611070141702	0.0806406609499156	0.0340684471736824	0.0807361142396699	0.0267994629376892	0.127528076200799	0.0831136325469384	0.104720694513392	0	0.0174199180560486	0.838207368202869	0.608102193244968	0.827198447168806	0.918307744740757	0.852149231209747	0.811742818595494	0.653945456917349	0.702701882073628	0.671893494967396	0.979511114525161	0.742934667546494	0.691669928864168	0.969687985325443	0.895447710000497	0.546132676727939	0.802733860445345	0.908823953396276	0.770576534437066	0.581027959123727	0.676183718418726	0.725650308956405	0.747226867877799	1.00789207667107	1.01919755839164	0.870807330906188	0.688612607720498
M415T2220		2	yes	0.010103888581371	0.000181060451627405	0.0960251298994284	0.00754176438675591	0.0157151391795196	0.0320852337679804	0.115644929799396	0.0117275824429833	0.0314307286990633	0.061710529967948	0.0686773149457638	0.0647766817811299	0.0281484453007558	0.0705983561672449	0.0257844572435547	0.122510240514655	0.0729891765703307	0.101112852486363	0.0174199180560486	0	0.768107811809459	0.621834969413933	0.815452327102539	0.932172195267204	0.806267275052993	0.876026859895122	0.684715074790178	0.69382306656642	0.688063273500303	1.05861755607407	0.714926404385711	0.710929643550643	0.931911623607501	0.729732075037628	0.584083793187722	0.798975801696169	0.938769629630021	0.815524694410031	0.632844101657027	0.741797733025095	0.773597210704801	0.856547251336532	0.974201560459184	1.01114113618024	0.857160720909709	0.679497673113818
OTU_1	Bacteria;Synergistetes;Synergistia;Synergistales;Synergistaceae;Aminobacterium;unknown species	-2	yes	0.869227228510389	0.748167142867735	0.391146807538487	0.804929373633769	0.801667239883954	0.820976524442903	0.369925716666213	0.780385711301306	0.838831150677891	0.460950652445897	0.442877948912503	0.43654558752278	0.929850987029117	0.423884602627692	0.861466540083205	0.340253010663776	0.41913569251222	0.395135945782257	0.838207368202869	0.768107811809459	0	0.29752883768965	0.292505352763968	0.164005380878803	0.182969539496581	3.58290892180785	0.184060875760161	0.15376046186588	0.138338362960101	3.77915879550971	5.43210722953752	0.111434811564269	0.218854003715832	0.112541165908692	1.47799850399485	2.88192570212237	4.73166624083836	3.61578641242806	0.176921042242953	2.31881070281626	3.17798445293138	8.13428615897815	0.166112859398836	1.18475238302971	0.162678943756652	3.12149993215506
OTU_10	Bacteria;Firmicutes;Clostridia;Clostridiales;Clostridiaceae 1;Clostridium sensu stricto 1;Clostridium disporicum	-1	yes	0.663564456538332	0.612054517220912	0.365216730246294	0.681724111719684	0.597846070222565	0.623264846773141	0.409932281441328	0.58448674263296	0.628372639515613	0.436404974570635	0.449385043381449	0.448387490087626	0.707156915772046	0.455887724070848	0.765948885522148	0.37861459649321	0.453673933092539	0.390151794007523	0.608102193244968	0.621834969413933	0.29752883768965	0	0.404405030874211	0.183644360127043	0.162470103871859	1.94696546456418	0.37445086081704	0.322039726839548	0.132278343240146	2.51056978541762	2.01133782901339	0.343984882618115	0.266083150754759	0.323174603798749	1.1430338088473	1.45659669977973	1.95860245764374	1.91216824796173	0.212326694446111	3.71081486203559	1.89047923439593	1.89193183601987	0.393861371483137	1.16340723403158	0.120666078844099	1.86857568260644
OTU_107		1	no	0.838500474740684	0.803947922768208	0.58017321164506	0.826763890008737	0.830195071286258	0.819600281647282	0.573373859833179	0.804147977049494	0.844168263352224	0.615155016601176	0.603815710125836	0.620221490910738	0.847217537337687	0.613841423309326	0.855018040926652	0.564331958930782	0.611016594894332	0.585944590754524	0.827198447168806	0.815452327102539	0.292505352763968	0.404405030874211	0	0.219064127661101	0.171328880321986	2.93220242156171	0.210113077409599	0.191671917262902	0.157013982959325	4.16464049351701	1.82452974035531	0.163579315735679	0.294314789840784	0.363068331148974	1.86807386162377	2.49760787994745	5.59779087997185	3.25843053234351	0.169853811566055	2.01119856570934	2.87906399598701	2.15295128028426	0.214059698673417	1.45618041504012	0.142989003917247	1.75248726818477
OTU_11		1	no	1.02942609699034	0.914542182455978	0.553539535803571	0.983616926301237	0.910985868030376	0.903371929466468	0.54532012829738	0.938662319344349	0.925567262388867	0.640975515115345	0.625008020142212	0.625545317625882	1.06946515157483	0.612469219666188	1.0484179755884	0.519489589632426	0.607780747828986	0.564975063024305	0.918307744740757	0.932172195267204	0.164005380878803	0.183644360127043	0.219064127661101	0	0.15988813875287	2.59485363646295	0.239111214712587	0.216673035557611	0.0762339239609447	4.33270187271159	4.10367344332203	0.181763619787161	0.171665099483085	0.331182941659813	1.99413952078266	4.76293924328154	5.86528255017258	3.16063160521372	0.170427136547797	4.32489707573226	5.12577855269631	3.75943621060232	0.171445325279277	1.34665874421882	0.0557979985642985	7.53151690565492
OTU_13	Bacteria;Firmicutes;Clostridia;Clostridiales;Syntrophomonadaceae;Syntrophomonas;unknown species	-1	yes	0.864112569503701	0.792345425322429	0.471897430406125	0.872472195799171	0.811544188787258	0.890163748569249	0.505111471292506	0.753757999815856	0.886664143471757	0.537640113204616	0.55956040507905	0.552668154486389	0.915233075238282	0.562268262454961	0.957006208415987	0.470234789736554	0.558837150695849	0.488698992258159	0.852149231209747	0.806267275052993	0.182969539496581	0.162470103871859	0.171328880321986	0.15988813875287	0	6.51425182085883	0.178278177514799	0.184194064563877	0.120731721316864	7.74767444795142	2.24438708867605	0.173159034525168	0.171911698780172	0.172875346266474	2.45998965050525	3.20079868493104	4.27001500241305	3.66949314015973	0.163154405046207	4.20365187671681	6.3718797643526	3.39641447489211	0.152412159675873	1.24708122046531	0.0492411780063782	2.38724344861852
OTU_130	Bacteria;Bacteroidetes;Bacteroidia;Bacteroidales;Bacteroidaceae;Bacteroides;Bacteroides ovatus	1	yes	0.816488479716187	0.88978394105498	1.27398380953599	0.827594827787597	0.875741593491047	0.77009375888645	1.32909250534199	0.957803242070135	0.790412866595654	1.24474282016725	1.2073144940829	1.22415145080252	0.85640772030608	1.19785158056495	0.836972462025555	1.27368737286237	1.20403791445508	1.33798174010503	0.811742818595494	0.876026859895122	3.58290892180785	1.94696546456418	2.93220242156171	2.59485363646295	6.51425182085883	0	2.24233555753211	4.59942988606142	2.23167997458015	0.18936188402561	0.511543348986895	3.37385765410826	4.59895726642522	3.93613288618716	0.312645546191541	0.311038427041007	0.247903314400406	0.119865885646649	3.12944272481814	0.367375707483857	0.128058778271487	0.296961291099351	7.242504532148	0.766841978345163	5.11807802061414	0.465655451112414
OTU_14	Bacteria;Bacteroidetes;Bacteroidia;Bacteroidales;Rikenellaceae;vadinBC27 wastewater-sludge group;unknown species	-2	yes	0.763519299688297	0.669921173396467	0.378879646694948	0.706688120663359	0.643923249658537	0.630160280408994	0.371283480807647	0.658544225524281	0.642259707385334	0.445455366145689	0.432991904615017	0.461189414362796	0.838734162134617	0.445192275682975	0.77687255772287	0.329959858343572	0.442179838392329	0.399190383196043	0.653945456917349	0.684715074790178	0.184060875760161	0.37445086081704	0.210113077409599	0.239111214712587	0.178278177514799	2.24233555753211	0	0.269586866368599	0.0912692283771422	2.42463274496247	3.99612125638554	0.0802342362269158	0.421050935565843	0.368467667904867	1.77673189316841	2.42166139328347	3.55277922938739	1.85362562655536	0.102918637975046	1.40436555268992	2.13823570297443	2.32389721087163	0.27928425885836	1.15321450396235	0.248043932387026	1.99182538141828
OTU_15		1	no	0.746110281848286	0.679743426536658	0.462012579985064	0.710721886701078	0.683729782693149	0.697029815495023	0.400697695434931	0.673246678205012	0.707230333586976	0.467008901400193	0.448972965635944	0.466620759219519	0.681210943503052	0.45645889533901	0.678676186461628	0.444571332774232	0.453268940960419	0.423749900152051	0.702701882073628	0.69382306656642	0.15376046186588	0.322039726839548	0.191671917262902	0.216673035557611	0.184194064563877	4.59942988606142	0.269586866368599	0	0.217035258431536	4.79470101478205	1.77761131397079	0.177167208264064	0.161512531310729	0.231523031639362	1.21354929946346	3.86809912699932	4.07065137093919	3.79424781744244	0.160236502307385	1.75810065818262	3.65183387378886	3.25435797957275	0.0763500772201943	1.43196703927305	0.153629664856447	1.9972130759859
OTU_16		1	no	0.752106764658849	0.672005361891125	0.347215590068711	0.723025334367964	0.672026709602532	0.656152450616324	0.362062008558006	0.670493356668737	0.680982685398745	0.42796748685541	0.416003389952076	0.431926436530225	0.82835007226535	0.421695462198246	0.816175141081123	0.318382916414192	0.418203815104809	0.374549695429257	0.671893494967396	0.688063273500303	0.138338362960101	0.132278343240146	0.157013982959325	0.0762339239609447	0.120731721316864	2.23167997458015	0.0912692283771422	0.217035258431536	0	3.5180565184516	4.21418294903406	0.101059879901562	0.276372579550884	0.271130776647893	1.86946779182641	2.76072140256339	3.8416744165556	2.18736471304648	0.0739400132146142	2.90889330383949	2.65950877587013	2.76367053250603	0.251144022282744	1.206548577707	0.0879287670948529	2.98175964932112
OTU_169	Bacteria;Firmicutes;Clostridia;Clostridiales;Ruminococcaceae;[Eubacterium] coprostanoligenes group;unknown species	1	yes	1.01080365950192	1.07026878154438	1.44785838325475	1.01406100048762	1.01711639141732	0.94845877407196	1.42147258966461	1.09236320110253	0.950116262752939	1.34847440917355	1.33143303265026	1.36224659814882	0.984024995402589	1.34784487503689	0.9674180507155	1.46713944896079	1.35380825756444	1.43098221149722	0.979511114525161	1.05861755607407	3.77915879550971	2.51056978541762	4.16464049351701	4.33270187271159	7.74767444795142	0.18936188402561	2.42463274496247	4.79470101478204	3.5180565184516	0	0.602199485594573	2.5154230103126	7.88444713586068	3.72074517768371	0.387905280993463	0.320821206884451	0.196520386881454	0.39990523192399	2.41581061895559	0.338848705652802	0.156514403375911	0.280255877620703	8.42870089936212	0.774130980557546	6.43193037719975	0.378160272112976
OTU_17		-1	no	0.596832590591852	0.734525367840937	1.45436660866014	0.677505666309251	0.766573585715814	0.787882598671522	1.50901872110409	0.699612384869793	0.775226189197915	1.1675979014614	1.22029293316068	1.21248757128104	0.508080342478694	1.27201311506429	0.608557513055469	1.7609892330842	1.28494955146971	1.39638725155001	0.742934667546494	0.714926404385711	5.43210722953752	2.01133782901339	1.82452974035531	4.10367344332203	2.24438708867605	0.511543348986895	3.99612125638554	1.7776113139708	4.21418294903406	0.602199485594573	0	4.03365390816246	2.12514872044689	2.16468032046233	0.508503719110116	0.445495826544578	0.337072846198861	0.429033587887379	3.25630479580586	0.451656786151789	0.490456053600568	0.265059220855282	2.39875338573021	0.919020745933476	2.73178729245503	0.245911240583221
OTU_18		1	no	0.792091206577211	0.690868593761534	0.358354099097329	0.722490027681635	0.679265600997046	0.656754014644724	0.324602494559109	0.685767273464627	0.677679985329174	0.405374690668371	0.385616879327843	0.413911392586157	0.805772045502881	0.39721997808289	0.75738663286627	0.316408893183624	0.393403417799141	0.357311492925379	0.691669928864168	0.710929643550643	0.111434811564269	0.343984882618115	0.163579315735679	0.181763619787161	0.173159034525168	3.37385765410825	0.0802342362269158	0.177167208264064	0.101059879901562	2.5154230103126	4.03365390816246	0	0.380729536595006	0.260777695876655	1.52872822699567	3.25550162300079	4.16378694741325	3.46999229907452	0.0326150310201283	1.80879577031966	3.01632530525405	2.48586409600077	0.241825208344725	1.26560465472372	0.151667006529251	2.76847941766676
OTU_19	Bacteria;Bacteroidetes;Bacteroidia;Bacteroidales;Rikenellaceae;vadinBC27 wastewater-sludge group;unknown species	-2	yes	0.988333588047453	0.921302235603794	0.685594559413109	0.978289811254602	0.940368566527453	0.989631364812657	0.676664654889775	0.917886939895426	0.989310606613506	0.734030131017173	0.733144404484164	0.722814739343406	0.990909321607582	0.723372221768679	0.997967880859806	0.672870351417017	0.720012518260128	0.678348371919785	0.969687985325443	0.931911623607501	0.218854003715832	0.266083150754759	0.294314789840784	0.171665099483085	0.171911698780172	4.59895726642523	0.421050935565843	0.161512531310729	0.276372579550884	7.88444713586068	2.12514872044689	0.380729536595006	0	0.303713727935836	1.66953280356587	2.41304720611063	7.48669277778256	4.48482466873662	0.357009039583569	2.78022440630154	3.86944828956704	4.72323766594395	0.0609239580578589	1.48688377681535	0.123969995754178	2.36424191478534
OTU_2	Archaea;Euryarchaeota;Methanomicrobia;Methanosarcinales;Methanosarcinaceae;Methanosarcina;Methanosarcina mazei	-1	yes	0.765225287313848	0.712944358372934	0.397345215819291	0.77173153952284	0.840658516489412	0.957153968007523	0.421169524581773	0.736746994129096	0.971155529660066	0.445517120020334	0.454834253547876	0.422216812837419	0.812409270146179	0.429347119284266	0.850137896047914	0.393767848010649	0.425065259577045	0.410628108275815	0.895447710000497	0.729732075037628	0.112541165908692	0.323174603798749	0.363068331148974	0.331182941659813	0.172875346266474	3.93613288618716	0.368467667904867	0.231523031639362	0.271130776647893	3.72074517768371	2.16468032046233	0.260777695876655	0.303713727935836	0	1.43966451931811	2.56718819238266	2.5378275795227	3.50018868074758	0.326919543612675	2.38782426366749	3.35400155934296	6.70480893512462	0.27041070192608	1.11572624389687	0.229103428876418	1.71071498927491
OTU_20	Bacteria;Bacteroidetes;Bacteroidia;Bacteroidales;Bacteroidaceae;Bacteroides;Bacteroides uniformis	1	yes	0.542777581382965	0.589450451960012	0.831921570037989	0.5305640434723	0.563270836026427	0.513396736494163	0.780606608365336	0.617204637379603	0.514125669560696	0.740072511555986	0.711404566700361	0.755262358971054	0.512926629461797	0.727966743752443	0.493122496416471	0.828372901093441	0.731082122357121	0.804450437620886	0.546132676727939	0.584083793187722	1.47799850399485	1.1430338088473	1.86807386162377	1.99413952078266	2.45998965050525	0.312645546191541	1.77673189316841	1.21354929946346	1.86946779182641	0.387905280993463	0.508503719110116	1.52872822699567	1.66953280356587	1.43966451931811	0	0.366555655075937	0.521948695547832	0.454802022114462	1.36141777375323	0.3553827928248	0.253942264883009	0.484151880584557	2.03835642810781	0.963899223182478	2.17243761854078	0.47024678936844
OTU_21		-1	no	0.721826070631041	0.817020742589346	1.27314704000537	0.768840740011084	0.826086759485376	0.797278167728306	1.43785806548835	0.800995715283288	0.786629395459011	1.21761640061858	1.25665134078917	1.24233755260746	0.787638463870627	1.27789295045912	0.799273588730462	1.32878295929046	1.28837163713515	1.3772426015691	0.802733860445345	0.798975801696169	2.88192570212237	1.45659669977973	2.49760787994745	4.76293924328154	3.20079868493104	0.311038427041007	2.42166139328347	3.86809912699932	2.76072140256338	0.320821206884451	0.445495826544578	3.25550162300079	2.41304720611063	2.56718819238266	0.366555655075937	0	0.380126796138613	0.332863893574253	2.84281297111795	0.414681845023372	0.0759583635987228	0.343480103135171	4.44384341888386	0.78738339270016	3.70764764443016	0.190197699032756
OTU_22		-1	no	0.866011008588481	0.950610954584094	1.29702553250858	0.904932531511788	0.930602580322271	0.915949109246724	1.35083122394079	0.938647560981007	0.909168719717106	1.20489819298359	1.21961754330011	1.22085033304734	0.847852862459429	1.2378395572468	0.887511757312833	1.38427313481757	1.2441162545647	1.30474753693791	0.908823953396277	0.938769629630021	4.73166624083837	1.95860245764374	5.59779087997185	5.86528255017258	4.27001500241305	0.247903314400406	3.55277922938739	4.07065137093919	3.8416744165556	0.196520386881454	0.337072846198861	4.16378694741325	7.48669277778256	2.5378275795227	0.521948695547832	0.380126796138613	0	0.227652258972068	3.29257211951371	0.397855911357717	0.256597290916653	0.254507497850705	10.4246665883043	0.655033010879765	5.54809921516498	0.260495512700838
OTU_24		-1	no	0.766858053325187	0.828326461141211	1.14926618639076	0.772149506089732	0.797720662271925	0.747821746074985	1.22593530821055	0.810566450693773	0.743463644869179	1.1262936069304	1.12359650133221	1.16133427890362	0.820948265567562	1.15529731449535	0.804191002195543	1.15172115011036	1.16276869392414	1.22459410701389	0.770576534437066	0.815524694410031	3.61578641242806	1.91216824796173	3.25843053234351	3.16063160521372	3.66949314015973	0.119865885646649	1.85362562655536	3.79424781744244	2.18736471304648	0.39990523192399	0.429033587887379	3.46999229907452	4.48482466873662	3.50018868074758	0.454802022114462	0.332863893574253	0.227652258972068	0	2.82970220851661	0.338925007941034	0.199004671482411	0.192562333537727	5.44207725111522	0.739697529498874	5.04523284746651	0.457507149074209
OTU_25	Bacteria;Bacteroidetes;Bacteroidetes vadinHA17;unknown order;unknown family;unknown genus;unknown species	-2	yes	0.690473616489905	0.615245554457231	0.32179145679421	0.64150318758552	0.57227608369619	0.555155235398009	0.295803781966745	0.580899877658209	0.568993479105691	0.360470058812307	0.343441971216567	0.384176065861736	0.687902625652061	0.370323983504297	0.670779029077231	0.29608940742913	0.367383873417571	0.318433702135302	0.581027959123727	0.632844101657027	0.176921042242953	0.212326694446111	0.169853811566055	0.170427136547797	0.163154405046207	3.12944272481814	0.102918637975046	0.160236502307385	0.0739400132146142	2.41581061895559	3.25630479580586	0.0326150310201283	0.357009039583569	0.326919543612675	1.36141777375323	2.84281297111795	3.29257211951371	2.82970220851661	0	1.8004576660521	2.53386705553698	1.77114365301094	0.2564758356754	1.30337581236728	0.124631261421298	2.32358808172791
OTU_26	Bacteria;Bacteroidetes;Bacteroidia;Bacteroidales;Porphyromonadaceae;Proteiniphilum;unknown species	1	yes	0.675358522908826	0.750076380872616	1.13870788889388	0.642238426079099	0.701361774350164	0.636675580536378	1.04743003172814	0.750320127566065	0.636184959385331	1.00036500289805	0.934359724802954	1.01000629413215	0.639411180368609	0.981368428778364	0.597386996078097	1.1139610688606	0.986969923984933	1.126093797029	0.676183718418726	0.741797733025095	2.31881070281626	3.71081486203559	2.01119856570934	4.32489707573226	4.20365187671681	0.367375707483857	1.40436555268992	1.75810065818262	2.90889330383949	0.338848705652802	0.451656786151789	1.80879577031966	2.78022440630154	2.38782426366749	0.3553827928248	0.414681845023372	0.397855911357717	0.338925007941034	1.8004576660521	0	0.221429496966616	0.370968142957555	2.30703894987577	0.892955368743851	5.27916896918124	0.24131283253403
OTU_28	Bacteria;Firmicutes;Clostridia;Clostridiales;Lachnospiraceae;Mobilitalea;unknown species	1	yes	0.707129115177133	0.786269047944321	1.17720473856937	0.719241142888096	0.764879918024316	0.693680014006649	1.21217808681159	0.796826020383765	0.698786231097275	1.10190137575126	1.0801869677271	1.11580645175774	0.729423354752476	1.10793507713019	0.712518049100629	1.18536167868486	1.11523990529875	1.2190787197851	0.725650308956405	0.773597210704801	3.17798445293138	1.89047923439593	2.87906399598701	5.12577855269631	6.3718797643526	0.128058778271487	2.13823570297443	3.65183387378886	2.65950877587013	0.156514403375911	0.490456053600568	3.01632530525404	3.86944828956704	3.35400155934296	0.253942264883009	0.0759583635987228	0.256597290916653	0.199004671482411	2.53386705553698	0.221429496966616	0	0.269010449262303	6.50718466200641	0.759525872635217	6.44294035386641	0.181002224058669
OTU_29		-1	no	0.788963645173586	0.869716162872615	1.28584613264102	0.802383685004722	0.779356343795957	0.721835194188904	1.30306712236778	0.785879671588471	0.713481984384315	1.16482687892445	1.17161459248234	1.28424936304227	0.748996153729319	1.28808309979451	0.777010840941292	1.37256664917126	1.29939380566633	1.29573514332013	0.747226867877798	0.856547251336532	8.13428615897815	1.89193183601987	2.15295128028426	3.75943621060232	3.39641447489211	0.296961291099351	2.32389721087163	3.25435797957275	2.76367053250604	0.280255877620703	0.265059220855282	2.48586409600077	4.72323766594395	6.70480893512463	0.484151880584557	0.343480103135171	0.254507497850705	0.192562333537727	1.77114365301094	0.370968142957555	0.269010449262303	0	4.94597962721933	0.906899796998655	3.4713686707084	0.393229366891067
OTU_30	Bacteria;Spirochaetae;Spirochaetes;Spirochaetales;Spirochaetaceae;Treponema 2;unknown species	-2	yes	1.06365560038827	0.958663228705322	0.669182109337021	1.02098033171048	0.970390270108456	1.01924174698451	0.619045414342524	0.949272834684244	1.02049023357429	0.707713889262976	0.696405345832322	0.702011569985219	1.02701062861484	0.693801658627764	1.00949732195985	0.640516570042594	0.68969220236622	0.639730692368185	1.00789207667107	0.974201560459184	0.166112859398836	0.393861371483137	0.214059698673417	0.171445325279277	0.152412159675873	7.242504532148	0.27928425885836	0.0763500772201943	0.251144022282744	8.42870089936213	2.39875338573021	0.241825208344725	0.0609239580578589	0.27041070192608	2.03835642810781	4.44384341888386	10.4246665883043	5.44207725111522	0.2564758356754	2.30703894987577	6.50718466200642	4.94597962721933	0	1.50547176318018	0.13434936217277	3.08189325981661
OTU_304		-1	no	1.00143549238683	1.01360513672403	1.05708784974525	1.00926359499785	1.02127039853859	1.02262784155406	1.07852005685882	1.01690990231862	1.02114935507138	1.05806240791756	1.06389314367098	1.05549602537443	1.019469883765	1.05911248009292	1.01963888177795	1.06009672906947	1.0598660139255	1.07049904335653	1.01919755839164	1.01114113618024	1.18475238302971	1.16340723403158	1.45618041504012	1.34665874421881	1.24708122046531	0.766841978345163	1.15321450396235	1.43196703927305	1.206548577707	0.774130980557546	0.919020745933476	1.26560465472372	1.48688377681535	1.11572624389687	0.963899223182478	0.78738339270016	0.655033010879765	0.739697529498874	1.30337581236728	0.892955368743851	0.759525872635217	0.906899796998655	1.50547176318018	0	1.3912993166122	0.811109263511765
OTU_31	Bacteria;Bacteroidetes;Bacteroidia;Bacteroidales;Porphyromonadaceae;Petrimonas;Petrimonas sulfuriphila	-2	yes	0.923624428436345	0.840979705055681	0.503913801091626	0.915543700499517	0.847860260416591	0.882835065650264	0.51283243044122	0.825510301572903	0.893671893461047	0.570212339297567	0.573720168271914	0.571692779566492	0.943281974177139	0.573050948501444	0.973798237776403	0.496871780664125	0.569030543696571	0.509648354352637	0.870807330906188	0.857160720909709	0.162678943756652	0.120666078844099	0.142989003917247	0.0557979985642985	0.0492411780063782	5.11807802061414	0.248043932387026	0.153629664856447	0.0879287670948529	6.43193037719975	2.73178729245503	0.151667006529251	0.123969995754178	0.229103428876418	2.17243761854078	3.70764764443016	5.54809921516498	5.04523284746651	0.124631261421298	5.27916896918124	6.44294035386641	3.4713686707084	0.13434936217277	1.3912993166122	0	3.78604822825195
OTU_33		-1	no	0.580649513113752	0.691132791673326	1.06985730023226	0.633788678552698	0.706958062652589	0.708299070207935	1.14506828950832	0.669519782899171	0.703684704680015	0.942439905367066	0.959684767165655	0.9733773275611	0.573925913403069	0.999246030909558	0.618844810206062	1.16611017562267	1.00648693571288	1.08662489232703	0.688612607720498	0.679497673113818	3.12149993215506	1.86857568260644	1.75248726818477	7.53151690565492	2.38724344861852	0.465655451112414	1.99182538141828	1.9972130759859	2.98175964932112	0.378160272112976	0.245911240583221	2.76847941766676	2.36424191478534	1.71071498927491	0.47024678936844	0.190197699032756	0.260495512700838	0.457507149074209	2.32358808172791	0.24131283253403	0.181002224058669	0.393229366891067	3.08189325981661	0.811109263511765	3.78604822825195	0
OTU_34		-1	no	1.29191202690697	1.36052867506911	1.89282632123968	1.32584505220204	1.31740149927143	1.33388608815543	1.98557511326968	1.36651368908543	1.29939518680481	1.81323259085287	1.86444935561305	1.79565831924618	1.31141706805064	1.82278618371036	1.31173544998087	1.95959557248994	1.83174997597724	1.91554083780302	1.31055607401189	1.33938728505399	4.86641290936008	3.38103990969292	11.0909183097042	3.89506950439927	4.39055285488984	0.309030171873754	3.44196452104543	7.72486779169514	5.25313620215141	0.33617691408733	0.50490299879843	6.24715096464399	4.68062271371021	3.37202928934033	0.959874093708466	0.613938864032913	0.185225560952554	0.239398959844065	6.78129951654587	0.530351609904016	0.526568229536666	0.42270937726548	5.03786493266582	0.691425054151769	6.46044226756682	0.642791473938357
OTU_35	Bacteria;Tenericutes;Mollicutes;Acholeplasmatales;Acholeplasmataceae;Acholeplasma;unknown species	-1	yes	1.05960339432126	0.99787821857642	0.723516308733304	1.08846243628319	1.03758077789567	1.14987271613332	0.764044695144713	0.968690581715125	1.1371480906097	0.785446111136546	0.818654012377114	0.782535893707374	1.08686269567008	0.803880404685422	1.14959098863811	0.740474346220673	0.800465667654548	0.733538627969214	1.08539657964005	1.00784420831646	0.314756133925886	0.245823920615203	0.302339490615895	0.233922575398422	0.0781785393679337	7.55152074512246	0.474376622447772	0.286200025151527	0.31139798285431	11.5346506378211	1.71016660442796	0.430210417761562	0.0919549232682053	0.260224107624066	2.7548767592881	2.45555174887786	4.17256430109142	4.64832458928059	0.415642726745732	4.93712208819948	6.69318620349592	3.82814390322624	0.154297069837466	1.27875364576491	0.0989238002324368	2.25134794682483
OTU_38	Bacteria;Chloroflexi;Anaerolineae;Anaerolineales;Anaerolineaceae;Ornatilinea;unknown species	-1	yes	0.661633350517717	0.572605768198513	0.317411904043297	0.648138791317692	0.609834444408832	0.631184444085767	0.293360878210684	0.610144835277826	0.652060975331925	0.354428533127009	0.350242459958294	0.330721586839748	0.636812118073841	0.32868554757364	0.656563981158969	0.30974115416106	0.324955650980348	0.299916158363998	0.621494274958245	0.586926262857551	0.132467463939414	0.204024638363581	0.299159880137046	0.202262205241744	0.174034201433083	2.60069377634613	0.250428911921634	0.11031831650562	0.16358984779921	3.46854781829766	2.0285948325869	0.220982395832171	0.260526326852536	0.146912042848132	1.40249570075482	3.28064626098962	2.64693376843707	2.85590111574003	0.235802278326194	2.64373129579607	3.09878417730648	4.7391898930616	0.212976576369036	1.18734598590424	0.172495540375889	2.08104435276277
OTU_4	Bacteria;Firmicutes;Clostridia;Clostridiales;Clostridiaceae 1;Clostridium sensu stricto 1;Clostridium butyricum	-2	yes	0.814122527408722	0.741566782008019	0.485122690551156	0.784039466138923	0.728790208551924	0.715148378514456	0.465016287825318	0.738917428484237	0.731469990224647	0.533466023514526	0.52028778869377	0.53680047439858	0.813566511413071	0.526446357205604	0.809182526241718	0.462900060860174	0.523255153925755	0.4827522070864	0.731980086747874	0.754672508014097	0.205296327363446	0.159927338976958	0.122805143268132	0.0645912808086444	0.149745156626355	2.56552329965429	0.213013077136129	0.117727153469224	0.0774289596462685	4.55041622037604	2.47130896166806	0.165342642393727	0.168104325493346	0.360422408240432	1.34407165070141	2.82867334521697	5.5886533636979	2.57502831277044	0.117205021101608	2.93742478653001	2.99532521303701	2.36016777096417	0.160710727908631	1.47792510575727	0.0636967108145197	3.39534053714589
OTU_41		1	no	0.912742189189827	0.81481645493419	0.515678370656378	0.862991901509923	0.78110176832998	0.765815796553071	0.505069863487639	0.806908207551099	0.776791143513045	0.593405725584516	0.576178889455145	0.597410962590271	0.955169042975865	0.582246912033715	0.918955318677732	0.477263846748822	0.578803646228563	0.528015019405283	0.790121617266096	0.829010237876929	0.17900588946025	0.192878694135156	0.219611133381907	0.0464877594716791	0.166186150473349	2.31559509928477	0.157883398652338	0.213835913607044	0.0818472598088239	3.58916225534107	3.60698227817885	0.16104875096832	0.176802954366973	0.438482554497667	1.61704591262816	3.11802333493241	6.08613858067125	2.25029925938929	0.13193076274128	2.44275945613785	3.20825934874653	2.49055592186791	0.162994346704661	1.38313421083848	0.0895929206240805	4.53866113789849
OTU_44	Bacteria;Firmicutes;Clostridia;Clostridiales;Syntrophomonadaceae;Syntrophomonas;Syntrophomonas wolfei	-1	yes	1.00115648227175	0.975219055622152	0.829013509892336	1.01100877774868	1.02716517239914	1.10223677721425	0.831117106376506	0.972914360403191	1.09562313261445	0.84579463580095	0.857350926052014	0.833663640599687	0.999066540384911	0.842587020043647	1.0197309454902	0.83155401387266	0.840074794018412	0.819109213118026	1.06225847022543	0.981523332415848	0.380800715165717	0.576970146091247	0.37208866373723	0.455516937602454	0.262328540806233	4.51517134530491	0.642215640759091	0.27768010348835	0.559893598698513	9.19190152975603	1.31445663391048	0.578671766841771	0.10806568090032	0.336399790453045	1.63286161907064	2.04601543685511	4.09140421386196	3.45481414026221	0.630230930960675	2.0224717380618	3.65746407261809	3.5844736284276	0.15685645028478	1.38595862618075	0.304162089719469	1.46168880634005
OTU_45	Bacteria;Chloroflexi;Anaerolineae;Anaerolineales;Anaerolineaceae;Longilinea;unknown species	-2	yes	0.851028767570028	0.706988324719448	0.362476576189571	0.765727070177098	0.665637503058685	0.648269913568302	0.313401803192992	0.693551525637368	0.6625821775235	0.419182160296277	0.396263806891845	0.423028125862	0.820156647338072	0.404161781336692	0.784370925501351	0.327895551731938	0.400198290994188	0.347932202396997	0.681096445000462	0.727617885385769	0.154831212159431	0.193087550673485	0.338260330611424	0.108931126452512	0.234838444348005	2.47494921359781	0.241251915106541	0.159693084700006	0.115605929353874	2.95968670329717	3.4255098163519	0.136932477036148	0.321622441548852	0.323781432761856	1.23832024103357	4.26101182353184	3.0880853603856	2.0897020541071	0.105146959161747	2.55923581170093	3.31596946454642	2.1300122129022	0.235127339142864	1.27681169111307	0.14639644861205	5.73047815401648
OTU_46	Bacteria;Bacteroidetes;Bacteroidia;Bacteroidales;Bacteroidaceae;Bacteroides;Bacteroides intestinalis	1	yes	0.642938555316692	0.736430297407872	1.09183452032756	0.674661214823184	0.736330985379183	0.725325296604233	1.14264970765682	0.730777820953264	0.717477083116484	0.978891692707403	0.99089157825393	0.989962413212695	0.632435447816065	1.00498148320342	0.662887754783107	1.16543494107884	1.01081450046383	1.10547153880787	0.722061097129443	0.725327870912823	3.44750547720105	2.31477363570425	2.83340025311185	5.13241822398668	2.80130289138584	0.316492875258322	2.73161917473641	2.34180011912457	3.80492951728125	0.421055410623238	0.203440951618853	3.11823607991011	3.90085353709267	2.00690378914376	0.400292917083535	0.45152973554819	0.137463160460374	0.221721740027095	2.99292153020022	0.281177660048099	0.357891253607169	0.29637053925793	4.64726180303433	0.791642926050754	4.21401664330837	0.208317095461624
OTU_5		1	no	0.786774197798519	0.720569483234402	0.459887341251097	0.77251598713022	0.736541103402369	0.791801660343617	0.45859160933804	0.704230586714839	0.789313448842889	0.507892388772997	0.508685505643105	0.504610873550413	0.79468465190441	0.50495045511836	0.812060003364611	0.451429802585825	0.5016211055186	0.458999318070924	0.773174331396867	0.733232370533178	0.127750767939584	0.169711275994996	0.309546161950316	0.143099197976448	0.0860066289352258	4.59528178372974	0.324039529572262	0.0981307665744414	0.190838995465476	8.63180525920506	1.97127949708624	0.25536443452129	0.10323906362675	0.162985176439203	1.40860599244419	3.61529229592416	3.71430183310828	2.972051158409	0.234016537817777	2.78112426374704	5.43367173233244	4.16366155228418	0.105488351744248	1.30425464891702	0.0844414114751633	2.73474301622725
OTU_50	Bacteria;Firmicutes;Clostridia;Clostridiales;Ruminococcaceae;Anaerofilum;unknown species	1	yes	0.886860218011456	0.95133995218375	1.32697462182717	0.888813457607436	0.921046309525671	0.881538089761882	1.29023223980942	0.954598703211825	0.875340844295351	1.20899231620958	1.1922305352611	1.21374653156395	0.853382001361152	1.20892346342806	0.841630469963724	1.34952680027332	1.21450619558863	1.30168463708025	0.901179128173349	0.940645524934546	3.22463940118636	2.84294080721551	6.59741007409433	7.88276652877108	8.2933618923688	0.243706774249856	2.88477215323498	3.14710875310325	4.45748566129958	0.114907968538949	0.456807875627992	3.23246103143576	7.00675939928719	2.67864586945242	0.344642732912327	0.293837058947845	0.106864721673342	0.25662032066337	3.00850054543188	0.213060165505087	0.133239117401415	0.318786644209899	6.49326956234176	0.688737671601186	10.8956517649402	0.271804400818612
OTU_51		1	no	0.605431272288971	0.544033205819872	0.313073228407048	0.60563133760431	0.562908120482939	0.575750003110644	0.326485608596497	0.536713555069525	0.591096766231744	0.372674140356912	0.370620454456338	0.371029051045751	0.631389664758735	0.371361972656273	0.660065265428848	0.309645445520994	0.36884986942331	0.324966637492503	0.569033565423301	0.554660545995445	0.166834483399743	0.0732351811034874	0.295149253260498	0.175414767786682	0.153484337213147	2.1285599475391	0.248038001532032	0.154239151977113	0.0997926030343094	3.49795528125538	2.03339758719783	0.270979723558983	0.206087119185721	0.244791824363328	1.37096249474207	1.94072177842366	2.495654632179	1.96127114597482	0.202553621830091	2.73819307428864	2.10866067935918	2.79154107546967	0.236463267479134	1.17479288711664	0.138895473656323	1.71020605654102
OTU_59	Bacteria;Firmicutes;Clostridia;Clostridiales;Peptococcaceae;Pelotomaculum;unknown species	-1	yes	0.75104498110986	0.690915090600264	0.450762803121516	0.746699968882451	0.683681890310003	0.700486564333908	0.458824724234262	0.680150589530898	0.707596631288223	0.506322511659175	0.507063960376978	0.505992050501555	0.765800588655156	0.507300506995385	0.790959873569941	0.44647616125	0.504448827096488	0.45828841399397	0.695865386863833	0.701626004833552	0.200241686268029	0.077608937350246	0.206795767846748	0.104943179120546	0.0879768834560999	2.98718480288196	0.246096214562203	0.14083709819671	0.106926939608592	5.14694844105488	2.0803788827587	0.235420083222735	0.105188245898508	0.289115025667638	1.46469497380785	2.22233912540183	3.82080713597395	2.80731574101975	0.172924158815239	3.04281527895457	2.99767504229593	2.90039529605981	0.161425511605786	1.34467486430559	0.0503555947836243	2.26893793549849
OTU_6	Bacteria;Bacteroidetes;Bacteroidia;Bacteroidales;Porphyromonadaceae;Petrimonas;unknown species	-2	yes	0.650062158499693	0.556543921457208	0.277795333068426	0.575657223447561	0.546757253829991	0.517270750333275	0.228699762119382	0.547416655755861	0.540565112597144	0.305671601297472	0.280037707762615	0.31770339283195	0.625837817048442	0.296362350302253	0.588514626032607	0.24323370538681	0.293274666775163	0.264061329557335	0.552024881710651	0.575441902896388	0.205944185354936	0.413805376543976	0.278539211261114	0.245910127040115	0.280600274116912	2.08598340167277	0.180951697764098	0.182970078380558	0.156760459633095	2.57459369976644	2.25864414932625	0.101906578479102	0.515417396031379	0.31270956415158	1.23008289393919	4.58065180402105	2.39052848132145	1.62485590838523	0.109606808597327	1.56791830850971	2.78244882104168	1.64401132689986	0.324350336674897	1.21082890245856	0.262192151579983	2.86173899305679
OTU_60	Bacteria;Firmicutes;Clostridia;Clostridiales;Peptococcaceae;Cryptanaerobacter;unknown species	-1	yes	0.946173437497837	0.912490152100159	0.724998140602002	0.941317093343581	0.939923063847774	0.974373224745139	0.714523127561262	0.911209457325197	0.981291125533992	0.749309768135414	0.746159129746158	0.747195921838371	0.9424125459932	0.745747228216664	0.952532212489169	0.715493193995218	0.743000164341545	0.718120238016342	0.957436131180002	0.921691383112927	0.330947154821778	0.497982887762137	0.124573607791993	0.296856300297503	0.194676849603894	4.21436117401122	0.361382807121437	0.194462347826117	0.334928679664734	6.54312067377699	1.61929070348826	0.342340323167706	0.112889814040121	0.352514323858064	1.79378001066565	2.60673964288543	6.98474091146867	4.22417132652072	0.357147879754856	1.83869027894818	3.77631181865682	3.16478147537841	0.105996886360338	1.67745648709295	0.202101503778958	1.57194797063189
OTU_61	Bacteria;Cloacimonetes;W5;unknown order;unknown family;unknown genus;unknown species	-1	yes	1.03861096079587	0.943032060950042	0.612141902833362	1.04065073819173	0.933200465110415	0.991172417553362	0.632063092437591	0.907763824554527	0.988548830033894	0.690379159670957	0.705812598811876	0.700964840512163	1.06737895216401	0.707686611652963	1.10290276907327	0.609860485572014	0.704056396314051	0.619046010576948	0.965367037049218	0.956878327802679	0.24006614673096	0.12487479268363	0.243404663586847	0.115174659557069	0.0763924965901435	5.04216594098426	0.299344632097883	0.246254004968401	0.161493953108336	4.54455323953874	2.64358083581971	0.255782928832945	0.0956641776596458	0.331324159131435	2.28527419206269	2.5015220924845	5.30814321270184	4.95354273813936	0.205789373449715	5.14104550018427	4.66319903856642	3.03631146938621	0.141606190299471	1.36966288871407	0.0404000550263606	3.01465565664773
OTU_65		1	no	1.0031541408162	0.851961168441492	0.502445994226354	0.899553359419976	0.891390676537999	0.848275214897329	0.448742553314711	0.917402600134405	0.882816598632856	0.5757291328378	0.540524836231891	0.547708151332306	1.06283306613221	0.519419610490707	0.934525582256644	0.420553416839346	0.514426131475673	0.502068365081929	0.897436180883457	0.87188079236027	0.0955175829733054	0.529342764355842	0.274441471665145	0.176467704374202	0.323979589287744	2.04466407557616	0.128798148246867	0.21839295353927	0.137347897353373	2.93271774955577	5.94886731981567	0.146254198305272	0.364088593574161	0.309740232974626	1.7014940903546	3.30189237901992	4.71119047808032	2.09190170908613	0.229304251644322	1.93681797584096	2.48079080880352	4.63844680969192	0.231464583704759	1.15616900297822	0.291261830346886	3.77795561660635
OTU_68	Bacteria;Bacteroidetes;Bacteroidia;Bacteroidales;Porphyromonadaceae;unknown genus;unknown species	1	yes	0.92562899143223	1.00035854015811	1.48894575294494	0.950205210346483	0.979351060634566	0.928973472571599	1.50040836300591	1.03039061659732	0.927127819837989	1.36611850963605	1.37243798232384	1.3592159646263	0.905238075380405	1.3642327231825	0.909132115748488	1.5436765549275	1.37177164174504	1.48334973948894	0.942851985510266	0.984577735722086	5.1124070162422	3.30227227000204	5.11783353821052	6.94974439525334	7.36599628692542	0.154023910065653	2.91095915068747	5.08595085647478	5.34358664018024	0.0857103658805644	0.367640760858439	3.98097556104595	8.45369610907215	3.97457547706265	0.467380906982285	0.322083190775515	0.117626923118299	0.255455952968671	4.34479213083366	0.303860438834498	0.186929083662678	0.27933381370333	9.77662494298639	0.712514546527447	10.7929516361365	0.256752457095273
OTU_7	Bacteria;Bacteroidetes;Bacteroidia;Bacteroidales;Bacteroidaceae;Bacteroides;Bacteroides graminisolvens	1	yes	0.654443438718537	0.766153053777969	1.32589600496335	0.678160721146511	0.763323457062551	0.70110842921743	1.35141764855324	0.766130433921497	0.706630087672771	1.17271178718547	1.14337014968318	1.19197462014999	0.623117563982354	1.18846973211526	0.650214249487492	1.42526876942334	1.19854778451038	1.35044765054624	0.719085049142378	0.750456777466052	5.11768763870814	1.95591495580233	3.25953258875401	4.32352993999718	6.57510683314564	0.163441292061789	5.4384072133686	2.93971689252932	4.17847476475946	0.274577432676478	0.19759657151402	5.10522892218126	3.2072347303242	3.41304177571686	0.204331747180442	0.235569439707065	0.203434288770225	0.194240273657799	3.54795708127711	0.272104091419074	0.152074775223705	0.17049730620274	5.04558319739535	0.856113111604095	5.16788463623841	0.255708714497737
OTU_74	Bacteria;Firmicutes;Clostridia;Clostridiales;Lachnospiraceae;Tyzzerella;Clostridium sp.	1	yes	0.868013605338286	0.929480773190938	1.25248591676294	0.85648604820883	0.901983355072734	0.833049805164334	1.22217306268008	0.951352295869707	0.837926528720972	1.16285467547029	1.13176861258183	1.16094738722584	0.853994177025541	1.14459700766544	0.82778202146666	1.24810351506738	1.14917004076216	1.25439833381288	0.870134925963284	0.920344918164776	2.96504662108033	3.00809099390501	3.82932067733534	4.54265395882817	8.00465275101735	0.160097848803933	2.27525109867072	3.47844505058558	3.13878694976157	0.120132791489448	0.51898830991762	2.35493425519515	13.6857788623322	2.77738087452616	0.333710512124458	0.364239648010499	0.156562034860404	0.200026842818978	2.40297862414263	0.218073389574218	0.156279731188659	0.281581351785479	9.00281799827693	0.714343533132164	7.9524281840732	0.411336944313425
OTU_75	Bacteria;Firmicutes;Clostridia;Clostridiales;Lachnospiraceae;Mobilitalea;unknown species	2	yes	0.880231391090093	0.945997403415071	1.214766439473	0.910043243202363	0.957376192576816	0.916971866020203	1.33367458369592	0.974977286975568	0.920429850442024	1.21574008675662	1.23015254934607	1.20119597876087	0.956868915197308	1.21035666541679	0.955683707547985	1.23000711431729	1.2153712034893	1.30030290857272	0.925888063843167	0.933507031261119	2.73470053554935	1.61687154649386	3.72208973675492	3.02198224570253	3.57442080718847	0.121377503601696	2.07014892090267	5.91754284621729	2.05873043479138	0.292965622490898	0.601309484790656	3.31949742524493	5.12704140644332	2.23824545128048	0.539107988150493	0.247910339628745	0.189645818141827	0.131462218863878	3.25485967607584	0.542565941610943	0.162670364460879	0.434784481171992	11.0000300501574	0.562428119654786	4.46061620048074	0.424830473781623
OTU_8	Bacteria;Thermotogae;Thermotogae;Petrotogales;Petrotogaceae;Defluviitoga;unknown species	-2	yes	1.06831651904473	0.950736097932526	0.598120511280835	1.03382687693436	0.986919021718342	1.04262576708572	0.603262731346899	0.950117502963898	1.04421286965524	0.684923885398248	0.687891676134109	0.673684511657523	1.1410506921607	0.67099528892098	1.10878369883577	0.559823450149152	0.66645546304349	0.611679644817603	1.03090407194075	0.966347370534638	0.0892558653994579	0.239182953704161	0.234685611193966	0.0966489367510094	0.0918946575278585	5.18409035098926	0.225953951033157	0.186404550950644	0.140209643460397	9.27107348372533	3.82314645648479	0.203985201209408	0.0803640010140603	0.207916606662759	2.10880295610425	2.8549138307756	12.5004430395208	4.00833016102755	0.239413323543596	4.07321280943691	5.09758263753854	6.65610315727223	0.0816955613496987	1.27291392149722	0.0779890410064002	4.45079262839626
OTU_82	Bacteria;Proteobacteria;Gammaproteobacteria;Pseudomonadales;Pseudomonadaceae;Pseudomonas;Pseudomonas caeni	-2	yes	1.03146763511524	1.02300335572577	1.12627858335109	0.99194962403307	0.959811020379478	0.943727728323242	1.06351763265256	0.991585472720824	0.925890543668504	1.08634919483477	1.06923536610341	1.11823199989298	1.00837493609468	1.09857648656224	0.955044076085047	1.09088072224491	1.1005653955527	1.09299563004019	0.970441995583239	1.02081430491474	1.32216780474305	1.62450038195031	3.00687113835946	1.82224643329881	2.143176198007	0.67624003845377	1.25788625528248	1.35404308642747	1.73062532214364	0.450164662777395	0.95988461789249	1.32640138390785	1.87215616701351	1.70050279881213	0.508854820169347	0.739924392411699	0.652025142450204	0.478171883397908	1.23062190187908	0.473959225249396	0.542908665461149	0.546670042905474	1.42158426227527	0.966837244155691	2.26293588690373	0.951891658110949
OTU_84		-1	no	0.748216817678732	0.83431289271565	1.25053038896832	0.771366954273841	0.804518404239192	0.765291946766752	1.28458552875516	0.844163646905736	0.760773284685441	1.14204088534496	1.14064143659999	1.1474359897485	0.733889096141813	1.15177511070913	0.751593462012058	1.3157490443859	1.15867073994086	1.26441538444847	0.77614849797641	0.821163942027651	5.01629840011348	2.36158427652102	5.20510825651365	6.20323233856354	5.57811307691543	0.135506666234358	3.16278145683363	4.00272046540279	4.49337303818622	0.174928157128748	0.275724313486789	4.20949436748482	6.84347075888852	3.07584020762626	0.30672970535302	0.320672111118358	0.0622615388975437	0.147855745742641	3.69137922577662	0.224239489444125	0.179271620264514	0.224936268787451	9.92085095164328	0.735626749664381	7.70483704430392	0.235449944583298
OTU_92		1	no	0.786408596957575	0.748621292537322	0.495172624585109	0.76211732005676	0.810280124051305	0.815948499933189	0.474564624045883	0.744136150769778	0.840800606436127	0.518421288196733	0.503574858996826	0.521270957236504	0.78719975194743	0.51255534646226	0.782850557105461	0.472111345872835	0.509210554229365	0.490660008448154	0.825384320288792	0.763574705224249	0.158483553722705	0.376333242406622	0.149887822413875	0.231046492776629	0.222987529396995	3.71660964078282	0.360920245290402	0.137599762737829	0.191411070273089	4.29671367480971	2.08588989575565	0.159584255957175	0.295811404962081	0.203078156210454	1.27499649218968	2.6056013531598	4.00016535407092	3.23186413789499	0.170947354163134	2.5275342302228	2.96408531910055	2.65787149771623	0.236748171481392	1.29910180711094	0.163486220768519	2.18597341164373
OTU_97	Bacteria;Firmicutes;Clostridia;Clostridiales;Syntrophomonadaceae;Syntrophomonas;unknown species	-1	yes	1.0515165164416	0.988397043531757	0.761834260151757	1.04246355109681	1.01326107984831	1.07763591341405	0.748317154391281	0.99326600976293	1.0730425832193	0.800360200561003	0.802686495948764	0.784221830787768	1.0423356263352	0.785841172680999	1.0521874941506	0.752851749804518	0.782263116037254	0.747717062326271	1.04926524557647	0.998780377046031	0.259456014110096	0.361726597356226	0.347662328103375	0.212665628118879	0.195293694810329	5.15884809741987	0.513177990905306	0.197132451493844	0.376863030025249	7.87753990291851	1.90670258935173	0.423198153909079	0.0226665819492676	0.29641192386936	1.60053652181193	2.78249943766009	6.92459694393837	5.38886630215488	0.433740125164056	2.6610245979394	5.11245196369097	4.99460074557803	0.0741493613403567	1.54228488182298	0.154603635980765	2.5159139336597
[truncated: 25 more columns]

## Sheet: Block PLS
Feature	Taxonomy	Cluster ID	Selected	acetate	CH4	CO2	M106T894	M129T1196	M179T1018	M205T1473	M207T1196	M229T1227	M266T1372	M271T1466	M285T1569	M290T1524	M291T1584	M292T1383	M299T1033	M308T1437	M310T1500	M357T2099	M369T1850	M379T1799	M398T1643	M415T2220	OTU_1	OTU_10	OTU_107	OTU_11	OTU_13	OTU_130	OTU_14	OTU_15	OTU_16	OTU_169	OTU_17	OTU_18	OTU_19	OTU_2	OTU_20	OTU_21	OTU_22	OTU_24	OTU_25	OTU_26	OTU_28	OTU_29	OTU_30
acetate		1	yes	0	7.80191871511336	13.4913417278307	1.1170987275392	1.13892744011718	1.29514545754032	1.10878279840314	1.12027316412559	1.07645233728198	1.27144101477854	1.15710736769297	1.08173733665749	1.25275954589826	1.24230939794942	1.26065803361923	1.09994466281779	1.24735925728713	1.08141327410525	1.29307507583446	1.24952952585342	1.28328289372096	1.09811011405593	1.13400268089598	2.04234363723672	2.11680258430946	2.22053362200744	1.96189836449135	2.92306607648792	0.408367795221934	1.67409614160275	2.6046014688655	1.95538075407655	0.185095970328273	0.802589884745538	1.5010661322574	6.41863857036689	1.98878768551419	0.693382831837336	0.777584062782412	0.380674784639509	0.570693024218317	1.60305852121222	0.672462611192483	0.553897058406108	0.466501582944641	3.50003394284266
CH4		-1	yes	7.80191871511336	0	0.0778793345571934	0.894178604473439	0.855368365845661	0.689653571159571	0.899386041343596	0.890546020303852	0.971852745097666	0.683857246555807	0.840896946750479	0.95998063608486	0.71016959224817	0.719653877590741	0.699994103506605	0.885400352669021	0.709543606172396	0.905956903679306	0.69037706603824	0.70696211220514	0.67594563614598	0.93191922360154	0.862856290134595	0.269781619807354	0.396514410346969	0.410896650522083	0.41186718234834	0.197046773373356	5.57128856899727	0.501656971893101	0.164989833763744	0.45080019183659	8.52708352750753	1.43072034438327	0.511901121303634	0.0670904995514652	0.254057620260177	1.55382748315007	1.94217205401196	3.52262499947525	3.41407701284127	0.510663582579856	1.83556211395014	3.17839344980725	4.61897208395665	0.102583396179136
CO2		-1	yes	13.4913417278307	0.0778793345571934	0	0.988718436604363	0.96395228034748	0.860568278430123	0.993222881637976	0.9911830062057	1.05173538279997	0.855550495689853	0.955443101804334	1.04132856178614	0.872022418717767	0.880823786180224	0.862999337245573	0.981020593902581	0.870778043185211	0.993398511519871	0.861921601535906	0.868978706379772	0.848080168739133	1.02139753825117	0.968314694639389	0.469305617943319	0.618589439956042	0.546905627859687	0.57140617219783	0.36935580077585	3.33443966156743	0.700634274670417	0.343276110377245	0.670756260824931	5.06712750002887	1.23987272729647	0.698878133602855	0.125507494172956	0.456203689929076	1.41917358756277	1.60130469215332	3.10833456612942	2.56880588123412	0.719519874001448	1.5345768413142	2.43883130097379	2.73178385484005	0.20335096343229
M106T894		2	yes	1.1170987275392	0.894178604473439	0.988718436604362	0	0.0114625809615901	0.134571821659952	0.0063889555994002	0.0302287697963014	0.0432594224811386	0.165935831394751	0.0211211055884855	0.0439460801715724	0.091399465252615	0.0972902673461688	0.096904492636081	0.0187692516502965	0.104097425769038	0.0252746531084393	0.169379527241459	0.106908890432808	0.145813055020383	0.0279251093305239	0.010103888581371	0.869227228510389	0.663564456538333	0.838500474740684	1.02942609699034	0.864112569503701	0.816488479716187	0.763519299688297	0.746110281848286	0.75210676465885	1.01080365950192	0.596832590591852	0.792091206577211	0.988333588047453	0.765225287313848	0.542777581382965	0.721826070631041	0.866011008588481	0.766858053325187	0.690473616489905	0.675358522908826	0.707129115177133	0.788963645173586	1.06365560038827
M129T1196		-1	no	1.13892744011718	0.855368365845661	0.96395228034748	0.0114625809615901	0	0.0883536860742639	0.00789646297962501	0.0150408746993621	0.0311861793345274	0.106294036572658	0.0113905061787742	0.0308321902927232	0.0552096648895819	0.0616582961553998	0.0581516653936328	0.0289052245598011	0.0635330147349079	0.02603095306598	0.113697552646603	0.0657999773993075	0.0925338157855632	0.0170067416701477	0.000181060451627405	0.748167142867735	0.612054517220912	0.803947922768208	0.914542182455978	0.792345425322429	0.889783941054981	0.669921173396467	0.679743426536658	0.672005361891125	1.07026878154438	0.734525367840937	0.690868593761534	0.921302235603794	0.712944358372934	0.589450451960012	0.817020742589346	0.950610954584093	0.828326461141211	0.615245554457231	0.750076380872616	0.786269047944321	0.869716162872615	0.958663228705322
M179T1018		-1	yes	1.29514545754032	0.689653571159571	0.860568278430123	0.134571821659952	0.0883536860742639	0	0.118411688010002	0.0975716182111265	0.113570783220448	0.0161452599954647	0.0893957082243804	0.119339271758128	0.0114152477871032	0.0158070791325488	0.0149730799927594	0.171418873517393	0.0164476940049263	0.16745910773714	0.00615886389700849	0.0163685040596839	0.00865640847327473	0.106266522202903	0.0960251298994284	0.391146807538487	0.365216730246294	0.58017321164506	0.553539535803571	0.471897430406126	1.27398380953599	0.378879646694948	0.462012579985064	0.347215590068711	1.44785838325475	1.45436660866014	0.358354099097329	0.685594559413109	0.397345215819291	0.831921570037989	1.27314704000537	1.29702553250858	1.14926618639076	0.32179145679421	1.13870788889388	1.17720473856937	1.28584613264102	0.669182109337021
M205T1473		1	yes	1.10878279840314	0.899386041343596	0.993222881637976	0.0063889555994002	0.00789646297962501	0.118411688010002	0	0.0196232089318003	0.0257396606166661	0.131607982812807	0.0194262515042251	0.0267628095529132	0.0765198767543301	0.0755051161997106	0.0805400927504428	0.0212544319500346	0.0824160636696754	0.0141138349350626	0.140259078118479	0.0849166022137664	0.124872470650918	0.0177494863461171	0.00754176438675591	0.804929373633769	0.681724111719684	0.826763890008736	0.983616926301237	0.872472195799171	0.827594827787597	0.706688120663359	0.710721886701078	0.723025334367964	1.01406100048762	0.677505666309251	0.722490027681635	0.978289811254602	0.77173153952284	0.5305640434723	0.768840740011085	0.904932531511788	0.772149506089732	0.64150318758552	0.642238426079099	0.719241142888096	0.802383685004722	1.02098033171048
M207T1196		2	yes	1.12027316412559	0.890546020303852	0.9911830062057	0.0302287697963014	0.0150408746993621	0.0975716182111265	0.0196232089318003	0	0.011091537408197	0.102489647762249	0.0146270342114297	0.00667990949341055	0.0615218337770658	0.0649262457976065	0.0737475229020758	0.0370959595098475	0.0757434805469555	0.0291518063392886	0.119186553602407	0.0780921097361397	0.0936469579384483	0.00297374671456254	0.0157151391795196	0.801667239883954	0.597846070222565	0.830195071286258	0.910985868030376	0.811544188787258	0.875741593491047	0.643923249658537	0.683729782693149	0.672026709602532	1.01711639141732	0.766573585715814	0.679265600997046	0.940368566527454	0.840658516489412	0.563270836026427	0.826086759485375	0.930602580322271	0.797720662271925	0.57227608369619	0.701361774350164	0.764879918024316	0.779356343795957	0.970390270108456
M229T1227		1	yes	1.07645233728198	0.971852745097666	1.05173538279997	0.0432594224811386	0.0311861793345274	0.113570783220448	0.0257396606166661	0.011091537408197	0	0.10763524737813	0.0391464311250199	0.00163859727815678	0.0796937945363734	0.0717257007945637	0.0886935625897618	0.0471259542946428	0.0840536837529373	0.0314476064647827	0.125474475607614	0.0862161810727916	0.111020563044517	0.0044289432198825	0.0320852337679804	0.820976524442903	0.623264846773141	0.819600281647282	0.903371929466468	0.890163748569249	0.77009375888645	0.630160280408994	0.697029815495023	0.656152450616323	0.94845877407196	0.787882598671522	0.656754014644724	0.989631364812657	0.957153968007523	0.513396736494163	0.797278167728306	0.915949109246723	0.747821746074985	0.555155235398009	0.636675580536378	0.693680014006649	0.721835194188904	1.01924174698451
M266T1372		1	no	1.27144101477854	0.683857246555807	0.855550495689852	0.165935831394751	0.106294036572658	0.0161452599954647	0.131607982812807	0.102489647762249	0.10763524737813	0	0.111038656138334	0.114217097962513	0.0140325674247507	0.00916211083179457	0.0157930506213438	0.166526220307751	0.0112765326781792	0.147454813066079	0.0144887231522265	0.0108983829017747	0.0055506198402305	0.110551208921135	0.115644929799396	0.369925716666213	0.409932281441328	0.573373859833179	0.54532012829738	0.505111471292506	1.32909250534199	0.371283480807647	0.400697695434931	0.362062008558006	1.42147258966461	1.50901872110409	0.324602494559109	0.676664654889775	0.421169524581773	0.780606608365336	1.43785806548835	1.35083122394079	1.22593530821055	0.295803781966745	1.04743003172814	1.21217808681159	1.30306712236778	0.619045414342524
M271T1466		2	yes	1.15710736769297	0.840896946750479	0.955443101804334	0.0211211055884855	0.0113905061787742	0.0893957082243804	0.0194262515042251	0.0146270342114297	0.0391464311250199	0.111038656138334	0	0.0336398796634038	0.0563373393203414	0.0674731894369783	0.073387616165614	0.0363822080231825	0.0815385906774309	0.0397507931402579	0.11912508101615	0.0841167304010842	0.0937319980755094	0.0221988505564702	0.0117275824429833	0.780385711301306	0.58448674263296	0.804147977049494	0.938662319344349	0.753757999815856	0.957803242070135	0.658544225524281	0.673246678205012	0.670493356668737	1.09236320110253	0.699612384869793	0.685767273464627	0.917886939895426	0.736746994129096	0.617204637379603	0.800995715283288	0.938647560981007	0.810566450693773	0.580899877658209	0.750320127566065	0.796826020383765	0.785879671588471	0.949272834684244
M285T1569		1	yes	1.08173733665749	0.95998063608486	1.04132856178614	0.0439460801715724	0.0308321902927232	0.119339271758128	0.0267628095529132	0.00667990949341055	0.00163859727815678	0.114217097962513	0.0336398796634038	0	0.0828518003162735	0.077982140438472	0.0949954978503565	0.0476836492168686	0.0917214578888755	0.0317723707864328	0.132735536002403	0.0940689613743092	0.115193761608914	0.00367032921376901	0.0314307286990633	0.838831150677891	0.628372639515613	0.844168263352224	0.925567262388867	0.886664143471757	0.790412866595654	0.642259707385334	0.707230333586976	0.680982685398745	0.950116262752939	0.775226189197915	0.677679985329174	0.989310606613506	0.971155529660066	0.514125669560696	0.786629395459011	0.909168719717107	0.743463644869179	0.568993479105691	0.636184959385331	0.698786231097275	0.713481984384315	1.02049023357429
M290T1524		-1	yes	1.25275954589826	0.71016959224817	0.872022418717767	0.091399465252615	0.0552096648895819	0.0114152477871032	0.0765198767543301	0.0615218337770658	0.0796937945363734	0.0140325674247507	0.0563373393203414	0.0828518003162735	0	0.00367423109658351	0.005098858726126	0.102100166316297	0.00668035244507956	0.0989552187007488	0.0232313725330989	0.00703959379639047	0.00646736762629781	0.0706772962527461	0.061710529967948	0.460950652445897	0.436404974570635	0.615155016601176	0.640975515115345	0.537640113204616	1.24474282016725	0.445455366145689	0.467008901400193	0.42796748685541	1.34847440917355	1.1675979014614	0.405374690668371	0.734030131017173	0.445517120020334	0.740072511555986	1.21761640061858	1.20489819298359	1.1262936069304	0.360470058812307	1.00036500289805	1.10190137575126	1.16482687892445	0.707713889262976
M291T1584		-2	yes	1.24230939794942	0.719653877590741	0.880823786180224	0.0972902673461688	0.0616582961553998	0.0158070791325488	0.0755051161997106	0.0649262457976065	0.0717257007945637	0.00916211083179457	0.0674731894369782	0.077982140438472	0.00367423109658351	0	0.00635514013441214	0.102327816660029	0.00399972544313864	0.0921968196889828	0.0220638791848494	0.00420576857616409	0.00901262971085137	0.0698611070141702	0.0686773149457638	0.442877948912503	0.449385043381449	0.603815710125836	0.625008020142212	0.55956040507905	1.2073144940829	0.432991904615017	0.448972965635944	0.416003389952076	1.33143303265026	1.22029293316068	0.385616879327843	0.733144404484164	0.454834253547876	0.711404566700361	1.25665134078917	1.21961754330011	1.12359650133221	0.343441971216567	0.934359724802954	1.0801869677271	1.17161459248234	0.696405345832322
M292T1383		-1	yes	1.26065803361923	0.699994103506605	0.862999337245573	0.096904492636081	0.0581516653936328	0.0149730799927594	0.0805400927504428	0.0737475229020758	0.0886935625897618	0.0157930506213438	0.073387616165614	0.0949954978503565	0.005098858726126	0.00635514013441214	0	0.108263728593825	0.00152318417707416	0.102425326536719	0.0251759129212706	0.00164469374217829	0.0102228745990893	0.0806406609499156	0.0647766817811299	0.43654558752278	0.448387490087626	0.620221490910738	0.625545317625882	0.552668154486389	1.22415145080252	0.461189414362796	0.466620759219519	0.431926436530225	1.36224659814882	1.21248757128104	0.413911392586157	0.722814739343406	0.422216812837419	0.755262358971054	1.24233755260746	1.22085033304734	1.16133427890362	0.384176065861736	1.01000629413215	1.11580645175774	1.28424936304227	0.702011569985219
M299T1033		-1	no	1.09994466281779	0.885400352669021	0.981020593902581	0.0187692516502965	0.0289052245598011	0.171418873517393	0.0212544319500346	0.0370959595098475	0.0471259542946428	0.166526220307751	0.0363822080231825	0.0476836492168686	0.102100166316297	0.102327816660029	0.108263728593825	0	0.113333991791137	0.00994194832528309	0.214438633301592	0.11606044174599	0.154125719358373	0.0340684471736824	0.0281484453007558	0.929850987029117	0.707156915772046	0.847217537337687	1.06946515157483	0.915233075238282	0.85640772030608	0.838734162134617	0.681210943503052	0.82835007226535	0.984024995402589	0.508080342478694	0.805772045502881	0.990909321607582	0.81240927014618	0.512926629461797	0.787638463870627	0.847852862459429	0.820948265567562	0.687902625652061	0.639411180368609	0.729423354752476	0.748996153729319	1.02701062861484
M308T1437		-2	yes	1.24735925728713	0.709543606172396	0.870778043185211	0.104097425769038	0.0635330147349079	0.0164476940049263	0.0824160636696754	0.0757434805469555	0.0840536837529373	0.0112765326781792	0.0815385906774309	0.0917214578888755	0.00668035244507956	0.00399972544313864	0.00152318417707416	0.113333991791137	0	0.101134228528531	0.0219385094962334	1.95113423842191e-05	0.0101209163211059	0.0807361142396699	0.0705983561672449	0.423884602627692	0.455887724070848	0.613841423309327	0.612469219666188	0.562268262454961	1.19785158056495	0.445192275682975	0.45645889533901	0.421695462198246	1.34784487503689	1.27201311506429	0.39721997808289	0.723372221768679	0.429347119284266	0.727966743752443	1.27789295045912	1.2378395572468	1.15529731449535	0.370323983504297	0.981368428778364	1.10793507713019	1.28808309979451	0.693801658627764
M310T1500		1	yes	1.08141327410525	0.905956903679306	0.993398511519871	0.0252746531084393	0.02603095306598	0.16745910773714	0.0141138349350626	0.0291518063392886	0.0314476064647827	0.147454813066079	0.0397507931402579	0.0317723707864328	0.0989552187007488	0.0921968196889828	0.102425326536719	0.00994194832528309	0.101134228528531	0	0.190980144072847	0.103688897263949	0.147645100335767	0.0267994629376892	0.0257844572435547	0.861466540083205	0.765948885522148	0.855018040926652	1.0484179755884	0.957006208415987	0.836972462025555	0.77687255772287	0.678676186461628	0.816175141081123	0.967418050715501	0.608557513055469	0.757386632866269	0.997967880859807	0.850137896047914	0.493122496416471	0.799273588730463	0.887511757312833	0.804191002195543	0.670779029077231	0.597386996078097	0.712518049100629	0.777010840941292	1.00949732195984
M357T2099		-2	yes	1.29307507583446	0.69037706603824	0.861921601535906	0.169379527241459	0.113697552646603	0.00615886389700849	0.140259078118479	0.119186553602407	0.125474475607614	0.0144887231522265	0.11912508101615	0.132735536002403	0.0232313725330989	0.0220638791848494	0.0251759129212706	0.214438633301592	0.0219385094962334	0.190980144072847	0	0.0215282865797467	0.0155316710077479	0.127528076200799	0.122510240514655	0.340253010663776	0.37861459649321	0.564331958930782	0.519489589632426	0.470234789736554	1.27368737286237	0.329959858343572	0.444571332774232	0.318382916414192	1.46713944896079	1.7609892330842	0.316408893183624	0.672870351417017	0.393767848010649	0.828372901093441	1.32878295929046	1.38427313481757	1.15172115011036	0.29608940742913	1.1139610688606	1.18536167868486	1.37256664917126	0.640516570042594
M369T1850		1	no	1.24952952585342	0.70696211220514	0.868978706379772	0.106908890432808	0.0657999773993075	0.0163685040596839	0.0849166022137664	0.0780921097361397	0.0862161810727916	0.0108983829017747	0.0841167304010842	0.0940689613743092	0.00703959379639047	0.00420576857616409	0.00164469374217829	0.11606044174599	1.95113423842191e-05	0.103688897263949	0.0215282865797467	0	0.00994089008049764	0.0831136325469384	0.0729891765703307	0.41913569251222	0.453673933092539	0.611016594894332	0.607780747828986	0.558837150695849	1.20403791445508	0.442179838392329	0.453268940960419	0.418203815104809	1.35380825756444	1.28494955146971	0.393403417799141	0.720012518260128	0.425065259577045	0.731082122357121	1.28837163713515	1.2441162545647	1.16276869392414	0.367383873417571	0.986969923984933	1.11523990529875	1.29939380566633	0.68969220236622
M379T1799		-1	yes	1.28328289372096	0.67594563614598	0.848080168739133	0.145813055020383	0.0925338157855632	0.00865640847327473	0.124872470650918	0.0936469579384483	0.111020563044517	0.0055506198402305	0.0937319980755094	0.115193761608914	0.00646736762629781	0.00901262971085137	0.0102228745990893	0.154125719358373	0.0101209163211059	0.147645100335767	0.0155316710077479	0.00994089008049764	0	0.104720694513392	0.101112852486363	0.395135945782257	0.390151794007523	0.585944590754524	0.564975063024305	0.488698992258159	1.33798174010503	0.399190383196043	0.423749900152051	0.374549695429257	1.43098221149722	1.39638725155001	0.357311492925379	0.678348371919785	0.410628108275815	0.804450437620886	1.3772426015691	1.30474753693791	1.22459410701389	0.318433702135302	1.126093797029	1.2190787197851	1.29573514332013	0.639730692368185
M398T1643		2	yes	1.09811011405593	0.93191922360154	1.02139753825117	0.0279251093305239	0.0170067416701477	0.106266522202903	0.0177494863461171	0.00297374671456254	0.0044289432198825	0.110551208921135	0.0221988505564702	0.00367032921376901	0.0706772962527461	0.0698611070141702	0.0806406609499156	0.0340684471736824	0.0807361142396699	0.0267994629376892	0.127528076200799	0.0831136325469384	0.104720694513392	0	0.0174199180560486	0.838207368202869	0.608102193244968	0.827198447168806	0.918307744740757	0.852149231209747	0.811742818595494	0.653945456917349	0.702701882073628	0.671893494967396	0.979511114525161	0.742934667546494	0.691669928864168	0.969687985325443	0.895447710000497	0.546132676727939	0.802733860445345	0.908823953396276	0.770576534437066	0.581027959123727	0.676183718418726	0.725650308956405	0.747226867877799	1.00789207667107
M415T2220		2	yes	1.13400268089598	0.862856290134595	0.968314694639389	0.010103888581371	0.000181060451627405	0.0960251298994284	0.00754176438675591	0.0157151391795196	0.0320852337679804	0.115644929799396	0.0117275824429833	0.0314307286990633	0.061710529967948	0.0686773149457638	0.0647766817811299	0.0281484453007558	0.0705983561672449	0.0257844572435547	0.122510240514655	0.0729891765703307	0.101112852486363	0.0174199180560486	0	0.768107811809459	0.621834969413933	0.815452327102539	0.932172195267204	0.806267275052993	0.876026859895122	0.684715074790178	0.69382306656642	0.688063273500303	1.05861755607407	0.714926404385711	0.710929643550643	0.931911623607501	0.729732075037628	0.584083793187722	0.798975801696169	0.938769629630021	0.815524694410031	0.632844101657027	0.741797733025095	0.773597210704801	0.856547251336532	0.974201560459184
OTU_1	Bacteria;Synergistetes;Synergistia;Synergistales;Synergistaceae;Aminobacterium;unknown species	-2	yes	2.04234363723672	0.269781619807354	0.469305617943319	0.869227228510389	0.748167142867735	0.391146807538487	0.804929373633769	0.801667239883954	0.820976524442903	0.369925716666213	0.780385711301306	0.838831150677891	0.460950652445897	0.442877948912503	0.43654558752278	0.929850987029117	0.423884602627692	0.861466540083205	0.340253010663776	0.41913569251222	0.395135945782257	0.838207368202869	0.768107811809459	0	0.29752883768965	0.292505352763968	0.164005380878803	0.182969539496581	3.58290892180785	0.184060875760161	0.15376046186588	0.138338362960101	3.77915879550971	5.43210722953752	0.111434811564269	0.218854003715832	0.112541165908692	1.47799850399485	2.88192570212237	4.73166624083836	3.61578641242806	0.176921042242953	2.31881070281626	3.17798445293138	8.13428615897815	0.166112859398836
OTU_10	Bacteria;Firmicutes;Clostridia;Clostridiales;Clostridiaceae 1;Clostridium sensu stricto 1;Clostridium disporicum	-1	yes	2.11680258430946	0.396514410346969	0.618589439956042	0.663564456538332	0.612054517220912	0.365216730246294	0.681724111719684	0.597846070222565	0.623264846773141	0.409932281441328	0.58448674263296	0.628372639515613	0.436404974570635	0.449385043381449	0.448387490087626	0.707156915772046	0.455887724070848	0.765948885522148	0.37861459649321	0.453673933092539	0.390151794007523	0.608102193244968	0.621834969413933	0.29752883768965	0	0.404405030874211	0.183644360127043	0.162470103871859	1.94696546456418	0.37445086081704	0.322039726839548	0.132278343240146	2.51056978541762	2.01133782901339	0.343984882618115	0.266083150754759	0.323174603798749	1.1430338088473	1.45659669977973	1.95860245764374	1.91216824796173	0.212326694446111	3.71081486203559	1.89047923439593	1.89193183601987	0.393861371483137
OTU_107		1	no	2.22053362200744	0.410896650522083	0.546905627859687	0.838500474740684	0.803947922768208	0.58017321164506	0.826763890008737	0.830195071286258	0.819600281647282	0.573373859833179	0.804147977049494	0.844168263352224	0.615155016601176	0.603815710125836	0.620221490910738	0.847217537337687	0.613841423309326	0.855018040926652	0.564331958930782	0.611016594894332	0.585944590754524	0.827198447168806	0.815452327102539	0.292505352763968	0.404405030874211	0	0.219064127661101	0.171328880321986	2.93220242156171	0.210113077409599	0.191671917262902	0.157013982959325	4.16464049351701	1.82452974035531	0.163579315735679	0.294314789840784	0.363068331148974	1.86807386162377	2.49760787994745	5.59779087997185	3.25843053234351	0.169853811566055	2.01119856570934	2.87906399598701	2.15295128028426	0.214059698673417
OTU_11		1	no	1.96189836449135	0.41186718234834	0.571406172197831	1.02942609699034	0.914542182455978	0.553539535803571	0.983616926301237	0.910985868030376	0.903371929466468	0.54532012829738	0.938662319344349	0.925567262388867	0.640975515115345	0.625008020142212	0.625545317625882	1.06946515157483	0.612469219666188	1.0484179755884	0.519489589632426	0.607780747828986	0.564975063024305	0.918307744740757	0.932172195267204	0.164005380878803	0.183644360127043	0.219064127661101	0	0.15988813875287	2.59485363646295	0.239111214712587	0.216673035557611	0.0762339239609447	4.33270187271159	4.10367344332203	0.181763619787161	0.171665099483085	0.331182941659813	1.99413952078266	4.76293924328154	5.86528255017258	3.16063160521372	0.170427136547797	4.32489707573226	5.12577855269631	3.75943621060232	0.171445325279277
OTU_13	Bacteria;Firmicutes;Clostridia;Clostridiales;Syntrophomonadaceae;Syntrophomonas;unknown species	-1	yes	2.92306607648792	0.197046773373356	0.36935580077585	0.864112569503701	0.792345425322429	0.471897430406125	0.872472195799171	0.811544188787258	0.890163748569249	0.505111471292506	0.753757999815856	0.886664143471757	0.537640113204616	0.55956040507905	0.552668154486389	0.915233075238282	0.562268262454961	0.957006208415987	0.470234789736554	0.558837150695849	0.488698992258159	0.852149231209747	0.806267275052993	0.182969539496581	0.162470103871859	0.171328880321986	0.15988813875287	0	6.51425182085883	0.178278177514799	0.184194064563877	0.120731721316864	7.74767444795142	2.24438708867605	0.173159034525168	0.171911698780172	0.172875346266474	2.45998965050525	3.20079868493104	4.27001500241305	3.66949314015973	0.163154405046207	4.20365187671681	6.3718797643526	3.39641447489211	0.152412159675873
OTU_130	Bacteria;Bacteroidetes;Bacteroidia;Bacteroidales;Bacteroidaceae;Bacteroides;Bacteroides ovatus	1	yes	0.408367795221934	5.57128856899727	3.33443966156743	0.816488479716187	0.88978394105498	1.27398380953599	0.827594827787597	0.875741593491047	0.77009375888645	1.32909250534199	0.957803242070135	0.790412866595654	1.24474282016725	1.2073144940829	1.22415145080252	0.85640772030608	1.19785158056495	0.836972462025555	1.27368737286237	1.20403791445508	1.33798174010503	0.811742818595494	0.876026859895122	3.58290892180785	1.94696546456418	2.93220242156171	2.59485363646295	6.51425182085883	0	2.24233555753211	4.59942988606142	2.23167997458015	0.18936188402561	0.511543348986895	3.37385765410826	4.59895726642522	3.93613288618716	0.312645546191541	0.311038427041007	0.247903314400406	0.119865885646649	3.12944272481814	0.367375707483857	0.128058778271487	0.296961291099351	7.242504532148
OTU_14	Bacteria;Bacteroidetes;Bacteroidia;Bacteroidales;Rikenellaceae;vadinBC27 wastewater-sludge group;unknown species	-2	yes	1.67409614160275	0.501656971893101	0.700634274670417	0.763519299688297	0.669921173396467	0.378879646694948	0.706688120663359	0.643923249658537	0.630160280408994	0.371283480807647	0.658544225524281	0.642259707385334	0.445455366145689	0.432991904615017	0.461189414362796	0.838734162134617	0.445192275682975	0.77687255772287	0.329959858343572	0.442179838392329	0.399190383196043	0.653945456917349	0.684715074790178	0.184060875760161	0.37445086081704	0.210113077409599	0.239111214712587	0.178278177514799	2.24233555753211	0	0.269586866368599	0.0912692283771422	2.42463274496247	3.99612125638554	0.0802342362269158	0.421050935565843	0.368467667904867	1.77673189316841	2.42166139328347	3.55277922938739	1.85362562655536	0.102918637975046	1.40436555268992	2.13823570297443	2.32389721087163	0.27928425885836
OTU_15		1	no	2.6046014688655	0.164989833763744	0.343276110377245	0.746110281848286	0.679743426536658	0.462012579985064	0.710721886701078	0.683729782693149	0.697029815495023	0.400697695434931	0.673246678205012	0.707230333586976	0.467008901400193	0.448972965635944	0.466620759219519	0.681210943503052	0.45645889533901	0.678676186461628	0.444571332774232	0.453268940960419	0.423749900152051	0.702701882073628	0.69382306656642	0.15376046186588	0.322039726839548	0.191671917262902	0.216673035557611	0.184194064563877	4.59942988606142	0.269586866368599	0	0.217035258431536	4.79470101478205	1.77761131397079	0.177167208264064	0.161512531310729	0.231523031639362	1.21354929946346	3.86809912699932	4.07065137093919	3.79424781744244	0.160236502307385	1.75810065818262	3.65183387378886	3.25435797957275	0.0763500772201943
OTU_16		1	no	1.95538075407655	0.45080019183659	0.670756260824931	0.752106764658849	0.672005361891125	0.347215590068711	0.723025334367964	0.672026709602532	0.656152450616324	0.362062008558006	0.670493356668737	0.680982685398745	0.42796748685541	0.416003389952076	0.431926436530225	0.82835007226535	0.421695462198246	0.816175141081123	0.318382916414192	0.418203815104809	0.374549695429257	0.671893494967396	0.688063273500303	0.138338362960101	0.132278343240146	0.157013982959325	0.0762339239609447	0.120731721316864	2.23167997458015	0.0912692283771422	0.217035258431536	0	3.5180565184516	4.21418294903406	0.101059879901562	0.276372579550884	0.271130776647893	1.86946779182641	2.76072140256339	3.8416744165556	2.18736471304648	0.0739400132146142	2.90889330383949	2.65950877587013	2.76367053250603	0.251144022282744
OTU_169	Bacteria;Firmicutes;Clostridia;Clostridiales;Ruminococcaceae;[Eubacterium] coprostanoligenes group;unknown species	1	yes	0.185095970328273	8.52708352750753	5.06712750002887	1.01080365950192	1.07026878154438	1.44785838325475	1.01406100048762	1.01711639141732	0.94845877407196	1.42147258966461	1.09236320110253	0.950116262752939	1.34847440917355	1.33143303265026	1.36224659814882	0.984024995402589	1.34784487503689	0.9674180507155	1.46713944896079	1.35380825756444	1.43098221149722	0.979511114525161	1.05861755607407	3.77915879550971	2.51056978541762	4.16464049351701	4.33270187271159	7.74767444795142	0.18936188402561	2.42463274496247	4.79470101478204	3.5180565184516	0	0.602199485594573	2.5154230103126	7.88444713586068	3.72074517768371	0.387905280993463	0.320821206884451	0.196520386881454	0.39990523192399	2.41581061895559	0.338848705652802	0.156514403375911	0.280255877620703	8.42870089936212
OTU_17		-1	no	0.802589884745538	1.43072034438327	1.23987272729648	0.596832590591852	0.734525367840937	1.45436660866014	0.677505666309251	0.766573585715814	0.787882598671522	1.50901872110409	0.699612384869793	0.775226189197915	1.1675979014614	1.22029293316068	1.21248757128104	0.508080342478694	1.27201311506429	0.608557513055469	1.7609892330842	1.28494955146971	1.39638725155001	0.742934667546494	0.714926404385711	5.43210722953752	2.01133782901339	1.82452974035531	4.10367344332203	2.24438708867605	0.511543348986895	3.99612125638554	1.7776113139708	4.21418294903406	0.602199485594573	0	4.03365390816246	2.12514872044689	2.16468032046233	0.508503719110116	0.445495826544578	0.337072846198861	0.429033587887379	3.25630479580586	0.451656786151789	0.490456053600568	0.265059220855282	2.39875338573021
OTU_18		1	no	1.5010661322574	0.511901121303634	0.698878133602856	0.792091206577211	0.690868593761534	0.358354099097329	0.722490027681635	0.679265600997046	0.656754014644724	0.324602494559109	0.685767273464627	0.677679985329174	0.405374690668371	0.385616879327843	0.413911392586157	0.805772045502881	0.39721997808289	0.75738663286627	0.316408893183624	0.393403417799141	0.357311492925379	0.691669928864168	0.710929643550643	0.111434811564269	0.343984882618115	0.163579315735679	0.181763619787161	0.173159034525168	3.37385765410825	0.0802342362269158	0.177167208264064	0.101059879901562	2.5154230103126	4.03365390816246	0	0.380729536595006	0.260777695876655	1.52872822699567	3.25550162300079	4.16378694741325	3.46999229907452	0.0326150310201283	1.80879577031966	3.01632530525405	2.48586409600077	0.241825208344725
OTU_19	Bacteria;Bacteroidetes;Bacteroidia;Bacteroidales;Rikenellaceae;vadinBC27 wastewater-sludge group;unknown species	-2	yes	6.41863857036689	0.0670904995514652	0.125507494172956	0.988333588047453	0.921302235603794	0.685594559413109	0.978289811254602	0.940368566527453	0.989631364812657	0.676664654889775	0.917886939895426	0.989310606613506	0.734030131017173	0.733144404484164	0.722814739343406	0.990909321607582	0.723372221768679	0.997967880859806	0.672870351417017	0.720012518260128	0.678348371919785	0.969687985325443	0.931911623607501	0.218854003715832	0.266083150754759	0.294314789840784	0.171665099483085	0.171911698780172	4.59895726642523	0.421050935565843	0.161512531310729	0.276372579550884	7.88444713586068	2.12514872044689	0.380729536595006	0	0.303713727935836	1.66953280356587	2.41304720611063	7.48669277778256	4.48482466873662	0.357009039583569	2.78022440630154	3.86944828956704	4.72323766594395	0.0609239580578589
OTU_2	Archaea;Euryarchaeota;Methanomicrobia;Methanosarcinales;Methanosarcinaceae;Methanosarcina;Methanosarcina mazei	-1	yes	1.98878768551419	0.254057620260177	0.456203689929076	0.765225287313848	0.712944358372934	0.397345215819291	0.77173153952284	0.840658516489412	0.957153968007523	0.421169524581773	0.736746994129096	0.971155529660066	0.445517120020334	0.454834253547876	0.422216812837419	0.812409270146179	0.429347119284266	0.850137896047914	0.393767848010649	0.425065259577045	0.410628108275815	0.895447710000497	0.729732075037628	0.112541165908692	0.323174603798749	0.363068331148974	0.331182941659813	0.172875346266474	3.93613288618716	0.368467667904867	0.231523031639362	0.271130776647893	3.72074517768371	2.16468032046233	0.260777695876655	0.303713727935836	0	1.43966451931811	2.56718819238266	2.5378275795227	3.50018868074758	0.326919543612675	2.38782426366749	3.35400155934296	6.70480893512462	0.27041070192608
OTU_20	Bacteria;Bacteroidetes;Bacteroidia;Bacteroidales;Bacteroidaceae;Bacteroides;Bacteroides uniformis	1	yes	0.693382831837336	1.55382748315007	1.41917358756277	0.542777581382965	0.589450451960012	0.831921570037989	0.5305640434723	0.563270836026427	0.513396736494163	0.780606608365336	0.617204637379603	0.514125669560696	0.740072511555986	0.711404566700361	0.755262358971054	0.512926629461797	0.727966743752443	0.493122496416471	0.828372901093441	0.731082122357121	0.804450437620886	0.546132676727939	0.584083793187722	1.47799850399485	1.1430338088473	1.86807386162377	1.99413952078266	2.45998965050525	0.312645546191541	1.77673189316841	1.21354929946346	1.86946779182641	0.387905280993463	0.508503719110116	1.52872822699567	1.66953280356587	1.43966451931811	0	0.366555655075937	0.521948695547832	0.454802022114462	1.36141777375323	0.3553827928248	0.253942264883009	0.484151880584557	2.03835642810781
OTU_21		-1	no	0.777584062782412	1.94217205401196	1.60130469215332	0.721826070631041	0.817020742589346	1.27314704000537	0.768840740011084	0.826086759485376	0.797278167728306	1.43785806548835	0.800995715283288	0.786629395459011	1.21761640061858	1.25665134078917	1.24233755260746	0.787638463870627	1.27789295045912	0.799273588730462	1.32878295929046	1.28837163713515	1.3772426015691	0.802733860445345	0.798975801696169	2.88192570212237	1.45659669977973	2.49760787994745	4.76293924328154	3.20079868493104	0.311038427041007	2.42166139328347	3.86809912699932	2.76072140256338	0.320821206884451	0.445495826544578	3.25550162300079	2.41304720611063	2.56718819238266	0.366555655075937	0	0.380126796138613	0.332863893574253	2.84281297111795	0.414681845023372	0.0759583635987228	0.343480103135171	4.44384341888386
OTU_22		-1	no	0.380674784639509	3.52262499947525	3.10833456612942	0.866011008588481	0.950610954584094	1.29702553250858	0.904932531511788	0.930602580322271	0.915949109246724	1.35083122394079	0.938647560981007	0.909168719717106	1.20489819298359	1.21961754330011	1.22085033304734	0.847852862459429	1.2378395572468	0.887511757312833	1.38427313481757	1.2441162545647	1.30474753693791	0.908823953396277	0.938769629630021	4.73166624083837	1.95860245764374	5.59779087997185	5.86528255017258	4.27001500241305	0.247903314400406	3.55277922938739	4.07065137093919	3.8416744165556	0.196520386881454	0.337072846198861	4.16378694741325	7.48669277778256	2.5378275795227	0.521948695547832	0.380126796138613	0	0.227652258972068	3.29257211951371	0.397855911357717	0.256597290916653	0.254507497850705	10.4246665883043
OTU_24		-1	no	0.570693024218317	3.41407701284127	2.56880588123412	0.766858053325187	0.828326461141211	1.14926618639076	0.772149506089732	0.797720662271925	0.747821746074985	1.22593530821055	0.810566450693773	0.743463644869179	1.1262936069304	1.12359650133221	1.16133427890362	0.820948265567562	1.15529731449535	0.804191002195543	1.15172115011036	1.16276869392414	1.22459410701389	0.770576534437066	0.815524694410031	3.61578641242806	1.91216824796173	3.25843053234351	3.16063160521372	3.66949314015973	0.119865885646649	1.85362562655536	3.79424781744244	2.18736471304648	0.39990523192399	0.429033587887379	3.46999229907452	4.48482466873662	3.50018868074758	0.454802022114462	0.332863893574253	0.227652258972068	0	2.82970220851661	0.338925007941034	0.199004671482411	0.192562333537727	5.44207725111522
OTU_25	Bacteria;Bacteroidetes;Bacteroidetes vadinHA17;unknown order;unknown family;unknown genus;unknown species	-2	yes	1.60305852121222	0.510663582579856	0.719519874001448	0.690473616489905	0.615245554457231	0.32179145679421	0.64150318758552	0.57227608369619	0.555155235398009	0.295803781966745	0.580899877658209	0.568993479105691	0.360470058812307	0.343441971216567	0.384176065861736	0.687902625652061	0.370323983504297	0.670779029077231	0.29608940742913	0.367383873417571	0.318433702135302	0.581027959123727	0.632844101657027	0.176921042242953	0.212326694446111	0.169853811566055	0.170427136547797	0.163154405046207	3.12944272481814	0.102918637975046	0.160236502307385	0.0739400132146142	2.41581061895559	3.25630479580586	0.0326150310201283	0.357009039583569	0.326919543612675	1.36141777375323	2.84281297111795	3.29257211951371	2.82970220851661	0	1.8004576660521	2.53386705553698	1.77114365301094	0.2564758356754
OTU_26	Bacteria;Bacteroidetes;Bacteroidia;Bacteroidales;Porphyromonadaceae;Proteiniphilum;unknown species	1	yes	0.672462611192483	1.83556211395014	1.5345768413142	0.675358522908826	0.750076380872616	1.13870788889388	0.642238426079099	0.701361774350164	0.636675580536378	1.04743003172814	0.750320127566065	0.636184959385331	1.00036500289805	0.934359724802954	1.01000629413215	0.639411180368609	0.981368428778364	0.597386996078097	1.1139610688606	0.986969923984933	1.126093797029	0.676183718418726	0.741797733025095	2.31881070281626	3.71081486203559	2.01119856570934	4.32489707573226	4.20365187671681	0.367375707483857	1.40436555268992	1.75810065818262	2.90889330383949	0.338848705652802	0.451656786151789	1.80879577031966	2.78022440630154	2.38782426366749	0.3553827928248	0.414681845023372	0.397855911357717	0.338925007941034	1.8004576660521	0	0.221429496966616	0.370968142957555	2.30703894987577
OTU_28	Bacteria;Firmicutes;Clostridia;Clostridiales;Lachnospiraceae;Mobilitalea;unknown species	1	yes	0.553897058406108	3.17839344980725	2.43883130097379	0.707129115177133	0.786269047944321	1.17720473856937	0.719241142888096	0.764879918024316	0.693680014006649	1.21217808681159	0.796826020383765	0.698786231097275	1.10190137575126	1.0801869677271	1.11580645175774	0.729423354752476	1.10793507713019	0.712518049100629	1.18536167868486	1.11523990529875	1.2190787197851	0.725650308956405	0.773597210704801	3.17798445293138	1.89047923439593	2.87906399598701	5.12577855269631	6.3718797643526	0.128058778271487	2.13823570297443	3.65183387378886	2.65950877587013	0.156514403375911	0.490456053600568	3.01632530525404	3.86944828956704	3.35400155934296	0.253942264883009	0.0759583635987228	0.256597290916653	0.199004671482411	2.53386705553698	0.221429496966616	0	0.269010449262303	6.50718466200641
OTU_29		-1	no	0.466501582944641	4.61897208395665	2.73178385484005	0.788963645173586	0.869716162872615	1.28584613264102	0.802383685004722	0.779356343795957	0.721835194188904	1.30306712236778	0.785879671588471	0.713481984384315	1.16482687892445	1.17161459248234	1.28424936304227	0.748996153729319	1.28808309979451	0.777010840941292	1.37256664917126	1.29939380566633	1.29573514332013	0.747226867877798	0.856547251336532	8.13428615897815	1.89193183601987	2.15295128028426	3.75943621060232	3.39641447489211	0.296961291099351	2.32389721087163	3.25435797957275	2.76367053250604	0.280255877620703	0.265059220855282	2.48586409600077	4.72323766594395	6.70480893512463	0.484151880584557	0.343480103135171	0.254507497850705	0.192562333537727	1.77114365301094	0.370968142957555	0.269010449262303	0	4.94597962721933
OTU_30	Bacteria;Spirochaetae;Spirochaetes;Spirochaetales;Spirochaetaceae;Treponema 2;unknown species	-2	yes	3.50003394284266	0.102583396179136	0.20335096343229	1.06365560038827	0.958663228705322	0.669182109337021	1.02098033171048	0.970390270108456	1.01924174698451	0.619045414342524	0.949272834684244	1.02049023357429	0.707713889262976	0.696405345832322	0.702011569985219	1.02701062861484	0.693801658627764	1.00949732195985	0.640516570042594	0.68969220236622	0.639730692368185	1.00789207667107	0.974201560459184	0.166112859398836	0.393861371483137	0.214059698673417	0.171445325279277	0.152412159675873	7.242504532148	0.27928425885836	0.0763500772201943	0.251144022282744	8.42870089936213	2.39875338573021	0.241825208344725	0.0609239580578589	0.27041070192608	2.03835642810781	4.44384341888386	10.4246665883043	5.44207725111522	0.2564758356754	2.30703894987577	6.50718466200642	4.94597962721933	0
OTU_304		-1	no	0.772788932281774	1.2623875182966	1.41555182132275	1.00143549238683	1.01360513672403	1.05708784974525	1.00926359499785	1.02127039853859	1.02262784155406	1.07852005685882	1.01690990231862	1.02114935507138	1.05806240791756	1.06389314367098	1.05549602537443	1.019469883765	1.05911248009292	1.01963888177795	1.06009672906947	1.0598660139255	1.07049904335653	1.01919755839164	1.01114113618024	1.18475238302971	1.16340723403158	1.45618041504012	1.34665874421881	1.24708122046531	0.766841978345163	1.15321450396235	1.43196703927305	1.206548577707	0.774130980557546	0.919020745933476	1.26560465472372	1.48688377681535	1.11572624389687	0.963899223182478	0.78738339270016	0.655033010879765	0.739697529498874	1.30337581236728	0.892955368743851	0.759525872635217	0.906899796998655	1.50547176318018
OTU_31	Bacteria;Bacteroidetes;Bacteroidia;Bacteroidales;Porphyromonadaceae;Petrimonas;Petrimonas sulfuriphila	-2	yes	2.66335577798742	0.25706441665263	0.421088738522178	0.923624428436345	0.840979705055681	0.503913801091626	0.915543700499517	0.847860260416591	0.882835065650264	0.51283243044122	0.825510301572903	0.893671893461047	0.570212339297567	0.573720168271914	0.571692779566492	0.943281974177139	0.573050948501444	0.973798237776403	0.496871780664125	0.569030543696571	0.509648354352637	0.870807330906188	0.857160720909709	0.162678943756652	0.120666078844099	0.142989003917247	0.0557979985642985	0.0492411780063782	5.11807802061414	0.248043932387026	0.153629664856447	0.0879287670948529	6.43193037719975	2.73178729245503	0.151667006529251	0.123969995754178	0.229103428876418	2.17243761854078	3.70764764443016	5.54809921516498	5.04523284746651	0.124631261421298	5.27916896918124	6.44294035386641	3.4713686707084	0.13434936217277
OTU_33		-1	no	0.86812259768528	1.30684816366369	1.22936980914694	0.580649513113752	0.691132791673326	1.06985730023226	0.633788678552698	0.706958062652589	0.708299070207935	1.14506828950832	0.669519782899171	0.703684704680015	0.942439905367066	0.959684767165655	0.9733773275611	0.573925913403069	0.999246030909558	0.618844810206062	1.16611017562267	1.00648693571288	1.08662489232703	0.688612607720498	0.679497673113818	3.12149993215506	1.86857568260644	1.75248726818477	7.53151690565492	2.38724344861852	0.465655451112414	1.99182538141828	1.9972130759859	2.98175964932112	0.378160272112976	0.245911240583221	2.76847941766676	2.36424191478534	1.71071498927491	0.47024678936844	0.190197699032756	0.260495512700838	0.457507149074209	2.32358808172791	0.24131283253403	0.181002224058669	0.393229366891067	3.08189325981661
OTU_34		-1	no	0.433904139436905	3.17199347153961	2.11951678299095	1.29191202690697	1.36052867506911	1.89282632123968	1.32584505220204	1.31740149927143	1.33388608815543	1.98557511326968	1.36651368908543	1.29939518680481	1.81323259085287	1.86444935561305	1.79565831924618	1.31141706805064	1.82278618371036	1.31173544998087	1.95959557248994	1.83174997597724	1.91554083780302	1.31055607401189	1.33938728505399	4.86641290936008	3.38103990969292	11.0909183097042	3.89506950439927	4.39055285488984	0.309030171873754	3.44196452104543	7.72486779169514	5.25313620215141	0.33617691408733	0.50490299879843	6.24715096464399	4.68062271371021	3.37202928934033	0.959874093708466	0.613938864032913	0.185225560952554	0.239398959844065	6.78129951654587	0.530351609904016	0.526568229536666	0.42270937726548	5.03786493266582
OTU_35	Bacteria;Tenericutes;Mollicutes;Acholeplasmatales;Acholeplasmataceae;Acholeplasma;unknown species	-1	yes	4.82590608967061	0.111306500070837	0.19449956977565	1.05960339432126	0.99787821857642	0.723516308733304	1.08846243628319	1.03758077789567	1.14987271613332	0.764044695144713	0.968690581715125	1.1371480906097	0.785446111136546	0.818654012377114	0.782535893707374	1.08686269567008	0.803880404685422	1.14959098863811	0.740474346220673	0.800465667654548	0.733538627969214	1.08539657964005	1.00784420831646	0.314756133925886	0.245823920615203	0.302339490615895	0.233922575398422	0.0781785393679337	7.55152074512246	0.474376622447772	0.286200025151527	0.31139798285431	11.5346506378211	1.71016660442796	0.430210417761562	0.0919549232682053	0.260224107624066	2.7548767592881	2.45555174887786	4.17256430109142	4.64832458928059	0.415642726745732	4.93712208819948	6.69318620349592	3.82814390322624	0.154297069837466
OTU_38	Bacteria;Chloroflexi;Anaerolineae;Anaerolineales;Anaerolineaceae;Ornatilinea;unknown species	-1	yes	2.09706178898033	0.264477775654852	0.491469595069123	0.661633350517717	0.572605768198513	0.317411904043297	0.648138791317692	0.609834444408832	0.631184444085767	0.293360878210684	0.610144835277826	0.652060975331925	0.354428533127009	0.350242459958294	0.330721586839748	0.636812118073841	0.32868554757364	0.656563981158969	0.30974115416106	0.324955650980348	0.299916158363998	0.621494274958245	0.586926262857551	0.132467463939414	0.204024638363581	0.299159880137046	0.202262205241744	0.174034201433083	2.60069377634613	0.250428911921634	0.11031831650562	0.16358984779921	3.46854781829766	2.0285948325869	0.220982395832171	0.260526326852536	0.146912042848132	1.40249570075482	3.28064626098962	2.64693376843707	2.85590111574003	0.235802278326194	2.64373129579607	3.09878417730648	4.7391898930616	0.212976576369036
OTU_4	Bacteria;Firmicutes;Clostridia;Clostridiales;Clostridiaceae 1;Clostridium sensu stricto 1;Clostridium butyricum	-2	yes	2.50229754874309	0.34845125815826	0.534903361099517	0.814122527408722	0.741566782008019	0.485122690551156	0.784039466138923	0.728790208551924	0.715148378514456	0.465016287825318	0.738917428484237	0.731469990224647	0.533466023514526	0.52028778869377	0.53680047439858	0.813566511413071	0.526446357205604	0.809182526241718	0.462900060860174	0.523255153925755	0.4827522070864	0.731980086747874	0.754672508014097	0.205296327363446	0.159927338976958	0.122805143268132	0.0645912808086444	0.149745156626355	2.56552329965429	0.213013077136129	0.117727153469224	0.0774289596462685	4.55041622037604	2.47130896166806	0.165342642393727	0.168104325493346	0.360422408240432	1.34407165070141	2.82867334521697	5.5886533636979	2.57502831277044	0.117205021101608	2.93742478653001	2.99532521303701	2.36016777096417	0.160710727908631
OTU_41		1	no	2.15880835992553	0.409465484800341	0.575273873991159	0.912742189189827	0.81481645493419	0.515678370656378	0.862991901509923	0.78110176832998	0.765815796553071	0.505069863487639	0.806908207551099	0.776791143513045	0.593405725584516	0.576178889455145	0.597410962590271	0.955169042975865	0.582246912033715	0.918955318677732	0.477263846748822	0.578803646228563	0.528015019405283	0.790121617266096	0.829010237876929	0.17900588946025	0.192878694135156	0.219611133381907	0.0464877594716791	0.166186150473349	2.31559509928477	0.157883398652338	0.213835913607044	0.0818472598088239	3.58916225534107	3.60698227817885	0.16104875096832	0.176802954366973	0.438482554497667	1.61704591262816	3.11802333493241	6.08613858067125	2.25029925938929	0.13193076274128	2.44275945613785	3.20825934874653	2.49055592186791	0.162994346704661
OTU_44	Bacteria;Firmicutes;Clostridia;Clostridiales;Syntrophomonadaceae;Syntrophomonas;Syntrophomonas wolfei	-1	yes	7.99663164021076	0.0641637825367568	0.0335861325579057	1.00115648227175	0.975219055622152	0.829013509892336	1.01100877774868	1.02716517239914	1.10223677721425	0.831117106376506	0.972914360403191	1.09562313261445	0.84579463580095	0.857350926052014	0.833663640599687	0.999066540384911	0.842587020043647	1.0197309454902	0.83155401387266	0.840074794018412	0.819109213118026	1.06225847022543	0.981523332415848	0.380800715165717	0.576970146091247	0.37208866373723	0.455516937602454	0.262328540806233	4.51517134530491	0.642215640759091	0.27768010348835	0.559893598698513	9.19190152975603	1.31445663391048	0.578671766841771	0.10806568090032	0.336399790453045	1.63286161907064	2.04601543685511	4.09140421386196	3.45481414026221	0.630230930960675	2.0224717380618	3.65746407261809	3.5844736284276	0.15685645028478
OTU_45	Bacteria;Chloroflexi;Anaerolineae;Anaerolineales;Anaerolineaceae;Longilinea;unknown species	-2	yes	1.58115826091932	0.490730497144788	0.693400839426058	0.851028767570028	0.706988324719448	0.362476576189571	0.765727070177098	0.665637503058685	0.648269913568302	0.313401803192992	0.693551525637368	0.6625821775235	0.419182160296277	0.396263806891845	0.423028125862	0.820156647338072	0.404161781336692	0.784370925501351	0.327895551731938	0.400198290994188	0.347932202396997	0.681096445000462	0.727617885385769	0.154831212159431	0.193087550673485	0.338260330611424	0.108931126452512	0.234838444348005	2.47494921359781	0.241251915106541	0.159693084700006	0.115605929353874	2.95968670329717	3.4255098163519	0.136932477036148	0.321622441548852	0.323781432761856	1.23832024103357	4.26101182353184	3.0880853603856	2.0897020541071	0.105146959161747	2.55923581170093	3.31596946454642	2.1300122129022	0.235127339142864
OTU_46	Bacteria;Bacteroidetes;Bacteroidia;Bacteroidales;Bacteroidaceae;Bacteroides;Bacteroides intestinalis	1	yes	0.638224320311978	1.92271108819559	1.63426402334284	0.642938555316692	0.736430297407872	1.09183452032756	0.674661214823184	0.736330985379183	0.725325296604233	1.14264970765682	0.730777820953264	0.717477083116484	0.978891692707403	0.99089157825393	0.989962413212695	0.632435447816065	1.00498148320342	0.662887754783107	1.16543494107884	1.01081450046383	1.10547153880787	0.722061097129443	0.725327870912823	3.44750547720105	2.31477363570425	2.83340025311185	5.13241822398668	2.80130289138584	0.316492875258322	2.73161917473641	2.34180011912457	3.80492951728125	0.421055410623238	0.203440951618853	3.11823607991011	3.90085353709267	2.00690378914376	0.400292917083535	0.45152973554819	0.137463160460374	0.221721740027095	2.99292153020022	0.281177660048099	0.357891253607169	0.29637053925793	4.64726180303433
OTU_5		1	no	3.32975793216327	0.119238212434708	0.287105756575727	0.786774197798519	0.720569483234402	0.459887341251097	0.77251598713022	0.736541103402369	0.791801660343617	0.45859160933804	0.704230586714839	0.789313448842889	0.507892388772997	0.508685505643105	0.504610873550413	0.79468465190441	0.50495045511836	0.812060003364611	0.451429802585825	0.5016211055186	0.458999318070924	0.773174331396867	0.733232370533178	0.127750767939584	0.169711275994996	0.309546161950316	0.143099197976448	0.0860066289352258	4.59528178372974	0.324039529572262	0.0981307665744414	0.190838995465476	8.63180525920506	1.97127949708624	0.25536443452129	0.10323906362675	0.162985176439203	1.40860599244419	3.61529229592416	3.71430183310828	2.972051158409	0.234016537817777	2.78112426374704	5.43367173233244	4.16366155228418	0.105488351744248
OTU_50	Bacteria;Firmicutes;Clostridia;Clostridiales;Ruminococcaceae;Anaerofilum;unknown species	1	yes	0.348421866705512	3.33170124736358	2.92772134377558	0.886860218011456	0.95133995218375	1.32697462182717	0.888813457607436	0.921046309525671	0.881538089761882	1.29023223980942	0.954598703211825	0.875340844295351	1.20899231620958	1.1922305352611	1.21374653156395	0.853382001361152	1.20892346342806	0.841630469963724	1.34952680027332	1.21450619558863	1.30168463708025	0.901179128173349	0.940645524934546	3.22463940118636	2.84294080721551	6.59741007409433	7.88276652877108	8.2933618923688	0.243706774249856	2.88477215323498	3.14710875310325	4.45748566129958	0.114907968538949	0.456807875627992	3.23246103143576	7.00675939928719	2.67864586945242	0.344642732912327	0.293837058947845	0.106864721673342	0.25662032066337	3.00850054543188	0.213060165505087	0.133239117401415	0.318786644209899	6.49326956234176
OTU_51		1	no	2.48887841142768	0.262583970180296	0.494237326918205	0.605431272288971	0.544033205819872	0.313073228407048	0.60563133760431	0.562908120482939	0.575750003110644	0.326485608596497	0.536713555069525	0.591096766231744	0.372674140356912	0.370620454456338	0.371029051045751	0.631389664758735	0.371361972656273	0.660065265428848	0.309645445520994	0.36884986942331	0.324966637492503	0.569033565423301	0.554660545995445	0.166834483399743	0.0732351811034874	0.295149253260498	0.175414767786682	0.153484337213147	2.1285599475391	0.248038001532032	0.154239151977113	0.0997926030343094	3.49795528125538	2.03339758719783	0.270979723558983	0.206087119185721	0.244791824363328	1.37096249474207	1.94072177842366	2.495654632179	1.96127114597482	0.202553621830091	2.73819307428864	2.10866067935918	2.79154107546967	0.236463267479134
OTU_59	Bacteria;Firmicutes;Clostridia;Clostridiales;Peptococcaceae;Pelotomaculum;unknown species	-1	yes	3.74297262082492	0.194288647106045	0.373831881955543	0.75104498110986	0.690915090600264	0.450762803121516	0.746699968882451	0.683681890310003	0.700486564333908	0.458824724234262	0.680150589530898	0.707596631288223	0.506322511659175	0.507063960376978	0.505992050501555	0.765800588655156	0.507300506995385	0.790959873569941	0.44647616125	0.504448827096488	0.45828841399397	0.695865386863833	0.701626004833552	0.200241686268029	0.077608937350246	0.206795767846748	0.104943179120546	0.0879768834560999	2.98718480288196	0.246096214562203	0.14083709819671	0.106926939608592	5.14694844105488	2.0803788827587	0.235420083222735	0.105188245898508	0.289115025667638	1.46469497380785	2.22233912540183	3.82080713597395	2.80731574101975	0.172924158815239	3.04281527895457	2.99767504229593	2.90039529605981	0.161425511605786
OTU_6	Bacteria;Bacteroidetes;Bacteroidia;Bacteroidales;Porphyromonadaceae;Petrimonas;unknown species	-2	yes	1.34728216218747	0.607581376248793	0.794421713521202	0.650062158499693	0.556543921457208	0.277795333068426	0.575657223447561	0.546757253829991	0.517270750333275	0.228699762119382	0.547416655755861	0.540565112597144	0.305671601297472	0.280037707762615	0.31770339283195	0.625837817048442	0.296362350302253	0.588514626032607	0.24323370538681	0.293274666775163	0.264061329557335	0.552024881710651	0.575441902896388	0.205944185354936	0.413805376543976	0.278539211261114	0.245910127040115	0.280600274116912	2.08598340167277	0.180951697764098	0.182970078380558	0.156760459633095	2.57459369976644	2.25864414932625	0.101906578479102	0.515417396031379	0.31270956415158	1.23008289393919	4.58065180402105	2.39052848132145	1.62485590838523	0.109606808597327	1.56791830850971	2.78244882104168	1.64401132689986	0.324350336674897
OTU_60	Bacteria;Firmicutes;Clostridia;Clostridiales;Peptococcaceae;Cryptanaerobacter;unknown species	-1	yes	5.06971298888896	0.141870963078318	0.14015653475975	0.946173437497837	0.912490152100159	0.724998140602002	0.941317093343581	0.939923063847774	0.974373224745139	0.714523127561262	0.911209457325197	0.981291125533992	0.749309768135414	0.746159129746158	0.747195921838371	0.9424125459932	0.745747228216664	0.952532212489169	0.715493193995218	0.743000164341545	0.718120238016342	0.957436131180002	0.921691383112927	0.330947154821778	0.497982887762137	0.124573607791993	0.296856300297503	0.194676849603894	4.21436117401122	0.361382807121437	0.194462347826117	0.334928679664734	6.54312067377699	1.61929070348826	0.342340323167706	0.112889814040121	0.352514323858064	1.79378001066565	2.60673964288543	6.98474091146867	4.22417132652072	0.357147879754856	1.83869027894818	3.77631181865682	3.16478147537841	0.105996886360338
OTU_61	Bacteria;Cloacimonetes;W5;unknown order;unknown family;unknown genus;unknown species	-1	yes	2.93551121140549	0.235816761077297	0.366853989375239	1.03861096079587	0.943032060950042	0.612141902833362	1.04065073819173	0.933200465110415	0.991172417553362	0.632063092437591	0.907763824554527	0.988548830033894	0.690379159670957	0.705812598811876	0.700964840512163	1.06737895216401	0.707686611652963	1.10290276907327	0.609860485572014	0.704056396314051	0.619046010576948	0.965367037049218	0.956878327802679	0.24006614673096	0.12487479268363	0.243404663586847	0.115174659557069	0.0763924965901435	5.04216594098426	0.299344632097883	0.246254004968401	0.161493953108336	4.54455323953874	2.64358083581971	0.255782928832945	0.0956641776596458	0.331324159131435	2.28527419206269	2.5015220924845	5.30814321270184	4.95354273813936	0.205789373449715	5.14104550018427	4.66319903856642	3.03631146938621	0.141606190299471
OTU_65		1	no	1.57344811734431	0.476590935394647	0.656196163081836	1.0031541408162	0.851961168441492	0.502445994226354	0.899553359419976	0.891390676537999	0.848275214897329	0.448742553314711	0.917402600134405	0.882816598632856	0.5757291328378	0.540524836231891	0.547708151332306	1.06283306613221	0.519419610490707	0.934525582256644	0.420553416839346	0.514426131475673	0.502068365081929	0.897436180883457	0.87188079236027	0.0955175829733054	0.529342764355842	0.274441471665145	0.176467704374202	0.323979589287744	2.04466407557616	0.128798148246867	0.21839295353927	0.137347897353373	2.93271774955577	5.94886731981567	0.146254198305272	0.364088593574161	0.309740232974626	1.7014940903546	3.30189237901992	4.71119047808032	2.09190170908613	0.229304251644322	1.93681797584096	2.48079080880352	4.63844680969192	0.231464583704759
OTU_68	Bacteria;Bacteroidetes;Bacteroidia;Bacteroidales;Porphyromonadaceae;unknown genus;unknown species	1	yes	0.311669693283214	4.70343298250501	3.10640361689198	0.92562899143223	1.00035854015811	1.48894575294494	0.950205210346483	0.979351060634566	0.928973472571599	1.50040836300591	1.03039061659732	0.927127819837989	1.36611850963605	1.37243798232384	1.3592159646263	0.905238075380405	1.3642327231825	0.909132115748488	1.5436765549275	1.37177164174504	1.48334973948894	0.942851985510266	0.984577735722086	5.1124070162422	3.30227227000204	5.11783353821052	6.94974439525334	7.36599628692542	0.154023910065653	2.91095915068747	5.08595085647478	5.34358664018024	0.0857103658805644	0.367640760858439	3.98097556104595	8.45369610907215	3.97457547706265	0.467380906982285	0.322083190775515	0.117626923118299	0.255455952968671	4.34479213083366	0.303860438834498	0.186929083662678	0.27933381370333	9.77662494298639
OTU_7	Bacteria;Bacteroidetes;Bacteroidia;Bacteroidales;Bacteroidaceae;Bacteroides;Bacteroides graminisolvens	1	yes	0.555119308871073	2.72537216541668	1.96026393327361	0.654443438718537	0.766153053777969	1.32589600496335	0.678160721146511	0.763323457062551	0.70110842921743	1.35141764855324	0.766130433921497	0.706630087672771	1.17271178718547	1.14337014968318	1.19197462014999	0.623117563982354	1.18846973211526	0.650214249487492	1.42526876942334	1.19854778451038	1.35044765054624	0.719085049142378	0.750456777466052	5.11768763870814	1.95591495580233	3.25953258875401	4.32352993999718	6.57510683314564	0.163441292061789	5.4384072133686	2.93971689252932	4.17847476475946	0.274577432676478	0.19759657151402	5.10522892218126	3.2072347303242	3.41304177571686	0.204331747180442	0.235569439707065	0.203434288770225	0.194240273657799	3.54795708127711	0.272104091419074	0.152074775223705	0.17049730620274	5.04558319739535
OTU_74	Bacteria;Firmicutes;Clostridia;Clostridiales;Lachnospiraceae;Tyzzerella;Clostridium sp.	1	yes	0.236093067526089	6.82052489694041	5.4774925546663	0.868013605338286	0.929480773190938	1.25248591676294	0.85648604820883	0.901983355072734	0.833049805164334	1.22217306268008	0.951352295869707	0.837926528720972	1.16285467547029	1.13176861258183	1.16094738722584	0.853994177025541	1.14459700766544	0.82778202146666	1.24810351506738	1.14917004076216	1.25439833381288	0.870134925963284	0.920344918164776	2.96504662108033	3.00809099390501	3.82932067733534	4.54265395882817	8.00465275101735	0.160097848803933	2.27525109867072	3.47844505058558	3.13878694976157	0.120132791489448	0.51898830991762	2.35493425519515	13.6857788623322	2.77738087452616	0.333710512124458	0.364239648010499	0.156562034860404	0.200026842818978	2.40297862414263	0.218073389574218	0.156279731188659	0.281581351785479	9.00281799827693
OTU_75	Bacteria;Firmicutes;Clostridia;Clostridiales;Lachnospiraceae;Mobilitalea;unknown species	2	yes	0.507985132565031	3.80518799744361	3.35137370100074	0.880231391090093	0.945997403415071	1.214766439473	0.910043243202363	0.957376192576816	0.916971866020203	1.33367458369592	0.974977286975568	0.920429850442024	1.21574008675662	1.23015254934607	1.20119597876087	0.956868915197308	1.21035666541679	0.955683707547985	1.23000711431729	1.2153712034893	1.30030290857272	0.925888063843167	0.933507031261119	2.73470053554935	1.61687154649386	3.72208973675492	3.02198224570253	3.57442080718847	0.121377503601696	2.07014892090267	5.91754284621729	2.05873043479138	0.292965622490898	0.601309484790656	3.31949742524493	5.12704140644332	2.23824545128048	0.539107988150493	0.247910339628745	0.189645818141827	0.131462218863878	3.25485967607584	0.542565941610943	0.162670364460879	0.434784481171992	11.0000300501574
OTU_8	Bacteria;Thermotogae;Thermotogae;Petrotogales;Petrotogaceae;Defluviitoga;unknown species	-2	yes	3.30726792510059	0.164903189271851	0.300273331664983	1.06831651904473	0.950736097932526	0.598120511280835	1.03382687693436	0.986919021718342	1.04262576708572	0.603262731346899	0.950117502963898	1.04421286965524	0.684923885398248	0.687891676134109	0.673684511657523	1.1410506921607	0.67099528892098	1.10878369883577	0.559823450149152	0.66645546304349	0.611679644817603	1.03090407194075	0.966347370534638	0.0892558653994579	0.239182953704161	0.234685611193966	0.0966489367510094	0.0918946575278585	5.18409035098926	0.225953951033157	0.186404550950644	0.140209643460397	9.27107348372533	3.82314645648479	0.203985201209408	0.0803640010140603	0.207916606662759	2.10880295610425	2.8549138307756	12.5004430395208	4.00833016102755	0.239413323543596	4.07321280943691	5.09758263753854	6.65610315727223	0.0816955613496987
OTU_82	Bacteria;Proteobacteria;Gammaproteobacteria;Pseudomonadales;Pseudomonadaceae;Pseudomonas;Pseudomonas caeni	-2	yes	0.480158653229839	1.72494910359826	1.71111899438791	1.03146763511524	1.02300335572577	1.12627858335109	0.99194962403307	0.959811020379478	0.943727728323242	1.06351763265256	0.991585472720824	0.925890543668504	1.08634919483477	1.06923536610341	1.11823199989298	1.00837493609468	1.09857648656224	0.955044076085047	1.09088072224491	1.1005653955527	1.09299563004019	0.970441995583239	1.02081430491474	1.32216780474305	1.62450038195031	3.00687113835946	1.82224643329881	2.143176198007	0.67624003845377	1.25788625528248	1.35404308642747	1.73062532214364	0.450164662777395	0.95988461789249	1.32640138390785	1.87215616701351	1.70050279881213	0.508854820169347	0.739924392411699	0.652025142450204	0.478171883397908	1.23062190187908	0.473959225249396	0.542908665461149	0.546670042905474	1.42158426227527
OTU_84		-1	no	0.434801646552823	3.52415272421397	2.66602792856594	0.748216817678732	0.83431289271565	1.25053038896832	0.771366954273841	0.804518404239192	0.765291946766752	1.28458552875516	0.844163646905736	0.760773284685441	1.14204088534496	1.14064143659999	1.1474359897485	0.733889096141813	1.15177511070913	0.751593462012058	1.3157490443859	1.15867073994086	1.26441538444847	0.77614849797641	0.821163942027651	5.01629840011348	2.36158427652102	5.20510825651365	6.20323233856354	5.57811307691543	0.135506666234358	3.16278145683363	4.00272046540279	4.49337303818622	0.174928157128748	0.275724313486789	4.20949436748482	6.84347075888852	3.07584020762626	0.30672970535302	0.320672111118358	0.0622615388975437	0.147855745742641	3.69137922577662	0.224239489444125	0.179271620264514	0.224936268787451	9.92085095164328
OTU_92		1	no	1.83432734890517	0.367049987260672	0.53590961658537	0.786408596957575	0.748621292537322	0.495172624585109	0.76211732005676	0.810280124051305	0.815948499933189	0.474564624045883	0.744136150769778	0.840800606436127	0.518421288196733	0.503574858996826	0.521270957236504	0.78719975194743	0.51255534646226	0.782850557105461	0.472111345872835	0.509210554229365	0.490660008448154	0.825384320288792	0.763574705224249	0.158483553722705	0.376333242406622	0.149887822413875	0.231046492776629	0.222987529396995	3.71660964078282	0.360920245290402	0.137599762737829	0.191411070273089	4.29671367480971	2.08588989575565	0.159584255957175	0.295811404962081	0.203078156210454	1.27499649218968	2.6056013531598	4.00016535407092	3.23186413789499	0.170947354163134	2.5275342302228	2.96408531910055	2.65787149771623	0.236748171481392
OTU_97	Bacteria;Firmicutes;Clostridia;Clostridiales;Syntrophomonadaceae;Syntrophomonas;unknown species	-1	yes	5.43862656494358	0.073315187721442	0.0980050535833109	1.0515165164416	0.988397043531757	0.761834260151757	1.04246355109681	1.01326107984831	1.07763591341405	0.748317154391281	0.99326600976293	1.0730425832193	0.800360200561003	0.802686495948764	0.784221830787768	1.0423356263352	0.785841172680999	1.0521874941506	0.752851749804518	0.782263116037254	0.747717062326271	1.04926524557647	0.998780377046031	0.259456014110096	0.361726597356226	0.347662328103375	0.212665628118879	0.195293694810329	5.15884809741987	0.513177990905306	0.197132451493844	0.376863030025249	7.87753990291851	1.90670258935173	0.423198153909079	0.0226665819492676	0.29641192386936	1.60053652181193	2.78249943766009	6.92459694393837	5.38886630215488	0.433740125164056	2.6610245979394	5.11245196369097	4.99460074557803	0.0741493613403567
propionate		2	yes	0.666670831343115	1.19992297624158	1.26636082503221	1.05346957659117	1.05258574959676	1.0653356006709	1.05308154394978	1.05159100767149	1.05249681061105	1.06067112968076	1.05321471642027	1.05164417449004	1.06025671388817	1.06123161115298	1.05940835929886	1.0472962813168	1.05989808130698	1.04649450696937	1.06715580784312	1.06000789799095	1.06035040252311	1.05157576500993	1.0521584620273	1.09554133701151	1.13085368196384	1.13957953003381	1.087359120207	1.12614845925003	0.99585493318982	1.10708672877458	1.13281776439149	1.12144796609852	0.873556614924433	0.988502132093065	1.06896037864532	1.1923856234237	1.07873645128158	1.05940075250996	1.01511211095173	0.929153440443405	1.02709733525922	1.0870140820203	1.0104045296669	1.02034103222678	0.950440961280358	1.10128766332439
[truncated: 29 more columns]
